# **An Evolutionarily Conserved piRNA-producing Locus Required for Male Mouse Fertility**

Pei-Hsuan Wu,<sup>1</sup> Yu Fu,<sup>2,3</sup> Katharine Cecchini,<sup>1</sup> Deniz M. Özata,<sup>1</sup> Zhiping Weng,<sup>3,4,\*</sup> and  
Phillip D. Zamore<sup>1,5,\*</sup>

<sup>1</sup>Howard Hughes Medical Institute and RNA Therapeutics Institute, University of  
Massachusetts Medical School, Worcester, MA 01605, USA

<sup>2</sup>Bioinformatics Program, Boston University, 44 Cummington Mall, Boston, MA 02215,  
USA

<sup>3</sup>Program in Bioinformatics and Integrative Biology, University of Massachusetts Medical  
School, Worcester, MA 01605, USA.

<sup>4</sup>Department of Biochemistry and Molecular Pharmacology, University of Massachusetts  
Medical School, 368 Plantation Street, Worcester, MA 01605, USA

<sup>5</sup>Lead contact

\*Correspondence: [zhiping.weng@umassmed.edu](mailto:zhiping.weng@umassmed.edu) (Z.W.),  
[phillip.zamore@umassmed.edu](mailto:phillip.zamore@umassmed.edu) (P.D.Z.)

Running title: A piRNA locus required for fertility

## SUMMARY (≤150 words; now 150)

Pachytene piRNAs, which comprise >80% of all small RNAs in the adult mouse testis, have been proposed to bind and regulate target RNAs like miRNAs, to cleave targets like siRNAs, or to lack biological function altogether. Although mutants lacking proteins that make pachytene piRNAs are male sterile, no biological function has been identified for any mammalian piRNA-producing locus. Here, we report that loss of piRNA precursor transcription from a conserved pachytene piRNA locus on mouse chromosome 6 (*pi6*) perturbs male fertility. Loss of *pi6* piRNAs has no measurable effect on sperm quantity or transposon repression, yet *pi6*<sup>-/-</sup> mice produce sperm with defects in motility, egg fertilization, and embryo development, severely reducing pup production even at the peak of male reproduction. Our data establish a direct role for pachytene piRNAs in spermiogenesis and embryo viability and enable new strategies to identify the RNA targets of individual piRNA species.

**Keywords:** PIWI-interacting RNA; piRNA; MIWI; A-MYB; MYBL1, spermatogenesis; acrosome; zona pellucida; sperm; pachytene piRNA; meiosis

## Highlights

- Normal male mouse fertility and spermiogenesis require piRNAs from the *pi6* locus
- Normal sperm motility and binding to zona pellucida require *pi6* piRNAs
- Sperm from *pi6* males fail to support embryo development
- Defects in *pi6* sperm reflect changes in the abundance of specific mRNAs

## INTRODUCTION

Only animals produce PIWI-interacting RNAs (piRNAs), 21–35-nt small RNAs that form the most abundant class of small RNA in the germline. In most animals, piRNAs protect the germline genome from transposons and repetitive sequences, and, in many arthropods, piRNAs fight viruses and transposons in somatic tissues (Houwing et al., 2007; Aravin et al., 2008; Batista et al., 2008; Das et al., 2008; Lewis et al., 2018). The mammalian male germline makes three classes of piRNAs: (1) 26–28 nt transposon-silencing piRNAs predominate in the fetal testis (Aravin et al., 2008); (2) shortly after birth 26–27 nt piRNAs derived from mRNA 3' untranslated regions (UTRs) emerge (Robine et al., 2009); and (3) at the pachytene stage of meiosis, ~30 nt, non-repetitive pachytene piRNAs appear. Pachytene piRNAs accumulate to comprise >80% of all small RNAs in the adult mouse testis, and they continue to be made throughout the male mouse reproductive lifespan. These piRNAs contain fewer transposon sequences than the genome as a whole, and most pachytene piRNAs map only to the loci from which they are produced. The diversity of pachytene piRNAs is unparalleled in development, with >1 million distinct species routinely detected in spermatocytes or spermatids. Intriguingly, the sequences of pachytene piRNAs are not themselves conserved, but piRNA-producing loci have been maintained at the syntenic regions across eutherian mammals (Girard et al., 2006; Chirn et al., 2015), suggesting that the vast sequence diversity of pachytene piRNAs is itself biologically meaningful.

In mice, 100 pachytene piRNA-producing loci have been annotated (Girard et al., 2006; Grivna et al., 2006; Lau et al., 2006; Ro et al., 2007; Li et al., 2013). All are coordinately regulated by the transcription factor A-MYB (MYBL1), which also promotes expression of proteins that convert piRNA precursor transcripts into mature piRNAs, as well as proteins required for cell cycle progression and meiosis (Bolcun-Filas et al., 2011). Of the 100 piRNA-producing loci, 15 pairs of pachytene piRNA-producing genes

are divergently transcribed from bidirectional, A-MYB-binding promoters (Li et al., 2013). The contribution of pachytene piRNAs from each piRNA-producing locus is unequal, with just five loci—*pi2*, *pi6*, *pi7*, *pi9*, and *pi17*—contributing to >50% of all pachytene piRNA production at 17 days postpartum (dpp).

Loss of proteins required to make pachytene piRNAs, including the pachytene piRNA-binding protein, MIWI (PIWIL1), invariably arrests spermatogenesis and renders males sterile (Deng and Lin, 2002; Reuter et al., 2011; Zheng and Wang, 2012; Li et al., 2013; Castañeda et al., 2014; Wasik et al., 2015). Yet, loss of the chromosome 17 pachytene piRNA-producing locus, *17-qA3.3-27363(-),26735(+)* (henceforth, *pi17*), has no detectable phenotype or impact on male fertility (Homolka et al., 2015), even though *pi17* produces ~30% of all pachytene piRNAs. Similarly, mice disrupted in expression of a piRNA cluster on chromosome 2 are viable and fertile (P.-H.W., K.C., and PDZ, unpublished; Xu et al., 2008). Consequently, the function of pachytene piRNAs in mice is actively debated. One model proposes that pachytene piRNAs regulate meiotic progression of spermatocytes by cleaving mRNAs during meiosis (Goh et al., 2015; Zhang et al., 2015). Another model posits that pachytene piRNAs direct degradation of specific mRNAs via a miRNA-like mechanism involving mRNA deadenylation (Gou et al., 2014). A third model proposes that MIWI functions without piRNAs, and that piRNAs are byproducts without a critical function (Vourekas et al., 2012). Compelling evidence exists to support each model.

In fact, direct demonstration of piRNA function in any animal has proven elusive. Only two piRNA-producing loci have been directly shown to have a biological function—both are in flies and were identified genetically before the discovery of piRNAs (Livak, 1984; Livak, 1990; Palumbo et al., 1994; Péliesson et al., 1994; Bozzetti et al., 1995; Prud'homme et al., 1995; Robert et al., 2001; Robert et al., 2001; Mével-Ninio et al., 2007). In male flies, piRNAs from *Suppressor of Stellate*, a multi-copy gene on the Y chromosome, silence the selfish gene *Stellate*, and deletion of *Suppressor of Stellate*

leads to Stellate protein crystals in spermatocytes (Aravin et al., 2001; Aravin et al., 2003). In female flies, deletion of the piRNA-producing *flamenco* gene, which is expressed in somatic follicle cells that support oogenesis, leads to *gypsy* family transposon expression and infertility (Brennecke et al., 2007; Saito et al., 2009).

Here, we report that a small promoter deletion in the chromosome 6 pachytene piRNA cluster *6-qF3-28913(-),8009(+)* (henceforth, *pi6*) that eliminates *pi6* piRNA production disrupts male fertility. The *pi6* locus, one of the five most productive piRNA-producing loci in mice, generates 5.8% of pachytene piRNAs in the adult testis and is conserved among eutherian mammals. Mice lacking *pi6*-derived piRNAs produce normal numbers of sperm and continue to repress transposons. However, *pi6* mutant sperm fertilize eggs poorly due to defective sperm motility and zona pellucida penetration. Consistent with these phenotypes, the steady-state abundance of mRNAs encoding proteins crucial for ciliary function, zona pellucida proteolysis, and egg binding was significantly decreased in sperm progenitor cells from *pi6* males. Our findings provide direct evidence for a biological function for pachytene piRNAs in male mouse fertility, and *pi6* promoter deletions provide a new model for the future identification of piRNA targets in vivo.

## RESULTS

### ***pi6* Promoter Deletion Eliminates *pi6* pachytene piRNAs**

To eliminate production of *pi6* pachytene piRNAs while minimizing the impact on adjacent genes, we used a pair of single-guide RNAs to delete 227 bp, including the A-MYB-binding promoter sequences, from *pi6* (Figure 1, S1A, and S1B, and Table S1; Li et al., 2013). For comparison, we created an analogous promoter deletion in *pi17*. We established stable mutant lines (*pi6<sup>em1</sup>*-1, -2, and -3 in Figure S1B) from three founders whose *pi6* promoter deletion sizes range from 219 to 230 bp and differ at their deletion boundaries, reflecting imprecise DNA repair after Cas9 cleavage. All three deletions

eliminated *pi6* primary transcripts and mature pachytene piRNAs from both arms of the locus (Figure 1). Because these lines were created using the same pair of sgRNA guides, we refer to all as the *pi6<sup>em1</sup>* allele.

### ***pi6* is Required for Male Mouse Fertility**

When paired with C57BL/6 females, *pi6<sup>em1/em1</sup>* males between 2 and 8 months old produced fewer pups compared to their littermates, even at peak reproductive age (Figure 2A and S2A). In six months, C57BL/6 males produced  $7 \pm 1$  ( $n = 5$ ) litters, while *pi6<sup>em1/em1</sup>* males produced  $2 \pm 2$  ( $n = 6$ ) litters. The significantly smaller number of progeny produced by *pi6<sup>em1/em1</sup>* males over their reproductive lifetime does not reflect fewer pups produced in each litter: *pi6<sup>em1/em1</sup>* males sired  $5 \pm 2$  ( $n = 4$ ) pups per litter compared to  $6 \pm 2$  ( $n = 27$ ) pups per litter for C57BL/6 control males (Figure 2A). Moreover, *pi6<sup>em1/em1</sup>* males regularly produced mating plugs, a sign of mating, in cohabiting females. Instead, the reduced progeny from *pi6<sup>em1/em1</sup>* males reflects two abnormal aspects of their fertility (Figure 2B). First, 29% of *pi6<sup>em1/em1</sup>* males never produced pups. Second, the mutants that did sire pups did so less frequently. These defects are specific for the loss of *pi6* piRNAs in males, because *pi6<sup>+/-em1</sup>* heterozygous males and *pi6<sup>em1/em1</sup>* homozygous mutant females showed no discernable phenotype. As observed previously for a partial-loss-of-function *pi17* promoter deletion (Homolka et al., 2015), males and females carrying a ~583-bp promoter deletion in *pi17* were fully fertile, despite loss of primary transcripts and mature piRNAs from both arms of the *pi17* locus (Figure 1).

To test that the reduced fertility of *pi6<sup>em1/em1</sup>* male mice reflects loss of the *pi6* promoter—and not an undetected Cas9-induced off-target mutation elsewhere in the genome—we used Cas9 and a second pair of sgRNAs to generate a 117 bp *pi6* promoter deletion, *pi6<sup>em2</sup>* (Figures 1, S1A, and S1C, and Table S1). Like *pi6<sup>em1/em1</sup>* male mice, *pi6<sup>em2/em2</sup>* males produced neither primary *pi6* transcripts nor mature *pi6* piRNAs

and showed reduced fertility (Figure S2A). We conclude that *pi6* piRNAs are required for C57BL/6 male fertility in mice.

### ***pi6<sup>em1/em1</sup>* Males Produce Fewer Embryos**

*pi6* mutant male matings were less likely to produce fully developed embryos. We examined the embryos produced by natural mating of C57BL/6 females housed with C57BL/6, *pi6<sup>+ /em1</sup>*, or *pi6<sup>em1/em1</sup>* males at 8.5, 14.5, or 16.5 days after occurrence of a mating plug. At 8.5 days after mating, C57BL/6 females housed with *pi6<sup>em1/em1</sup>* males carried fewer embryos ( $2 \pm 2$ ,  $n = 3$ ) compared to the females paired with *pi6<sup>+ /em1</sup>* ( $6 \pm 5$ ,  $n = 2$ ) or C57BL/6 control ( $7 \pm 4$ ,  $n = 1$ ) males (Figure 2C). At 14.5 and 16.5 days post-mating, female mice paired with *pi6<sup>em1/em1</sup>* males had even fewer embryos. Consistent with the observation that naturally-born pups sired by *pi6<sup>em1/em1</sup>* males were rare but healthy, the surviving embryos resulting from natural mating showed no obvious abnormalities.

Moreover, *pi6* piRNAs appear to play little if any role in the soma of the developing embryo. *pi6<sup>+ /em1</sup>* heterozygous males mated to *pi6<sup>+ /em1</sup>* heterozygous females yielded progeny at the expected Mendelian and sex ratios. Moreover, the weight of *pi6<sup>em1/em1</sup>* homozygous pups ( $28.3 \pm 0.6$  g,  $n = 8$ ) that developed to adulthood was indistinguishable from their C57BL/6 ( $26.9 \pm 0.3$  g,  $n = 8$ ) or heterozygous littermates ( $28.6 \pm 0.3$  g,  $n = 8$ ) (Figure S2B). We detected no difference in the gross appearance or obvious changes in behavior among these pups.

### ***pi6<sup>em1/em1</sup>* Males Produce Mature Spermatozoa**

Two-to-four months after birth, both *pi6<sup>+ /em1</sup>* and *pi6<sup>em1/em1</sup>* testes weighed slightly less than C57BL/6 testes (Figure S2B). Nonetheless, *pi6<sup>em1/em1</sup>* testis gross histology was normal, with all expected germ cell types present in seminiferous tubules and sperm clearly visible in the lumen (Figure 2D). The quantity of caudal epididymal sperm

produced by *pi6<sup>em1/em1</sup>* mice ( $19 \pm 10$  million sperm per ml;  $n = 6$ ) was also comparable to that of their *pi6<sup>+/em1</sup>* ( $23 \pm 7$  million sperm/ml;  $n = 4$ ) or C57BL/6 ( $20 \pm 10$  million sperm per ml;  $n = 13$ ) littermates (Figure 2E).

Although *pi6<sup>em1/em1</sup>* mice produce normal numbers of sperm, the sperm showed signs of agglutination compared to C57BL/6 sperm after 90 min of incubation in vitro, and ~10% of *pi6<sup>em1/em1</sup>* caudal epididymal sperm had abnormal head morphology (Figure S2C). Defects in germ cell chromosomal synapsis, triggering errors in gene expression, have been linked to abnormal sperm head shape (Wong et al., 2008; de Boer et al., 2015). In fact,  $22 \pm 7$  percent of *pi6<sup>em1/em1</sup>* pachytene spermatocytes had unsynapsed sex chromosomes or incompletely synapsed autosomal chromosomes, compared to  $7 \pm 3$  percent for C57BL/6 ( $n = 4$ ) (Figure S2E).

### ***pi6<sup>em1/em1</sup>* Sperm Fail to Fertilize**

*pi6* mutant males produce ordinary numbers of normally shaped sperm (~90%), yet are ineffectual at siring offspring. We used in vitro fertilization (IVF) to distinguish between defects in mating behavior and sperm function, incubating sperm from C57BL/6, *pi6<sup>+/em1</sup>*, or *pi6<sup>em1/em1</sup>* males with wild-type oocytes and scoring for the presence of both male and female pronuclei and the subsequent development of the resulting bi-pronuclear zygotes into two-cell embryos 24 h later (Figure 3A). The majority of oocytes incubated with C57BL/6 ( $91 \pm 5\%$ ;  $n = 5$ ) or *pi6<sup>+/em1</sup>* ( $60 \pm 35\%$ ;  $n = 3$ ) sperm developed into two-cell embryos. By contrast, only  $7 \pm 5\%$  ( $n = 7$ ) of oocytes incubated with *pi6<sup>em1/em1</sup>* sperm reached the two-cell stage. The majority of these oocytes remained one-cell embryos, and few contained a male pronucleus, suggesting that *pi6<sup>em1/em1</sup>* sperm are defective in fertilization.

## ***pi6<sup>em1/em1</sup>* Sperm Nuclei Support Fertilization**

The best studied piRNA function is transposon silencing, and mouse *pi2* has been proposed to be involved in LINE1 element silencing, although *pi2* mutant males are fertile (Xu et al., 2008). Moreover, LINE1 transcript abundance increases in mice bearing inactivating mutations in the catalytic site of MIWI (Reuter et al., 2011). Transposon activation can produce DNA damage, and genomic integrity is critical for fertilization (Ahmadi and Ng, 1999; Morris et al., 2002; Bourc'his and Bestor, 2004; Lewis and Aitken, 2005). However, pachytene piRNAs are depleted of repetitive sequences in contrast to other types of piRNA-producing genomic loci (Figure S3A; Aravin et al., 2006; Girard et al., 2006; Gainetdinov et al., 2018).

We asked whether the defect in fertilization by *pi6<sup>em1/em1</sup>* might reflect DNA damage or epigenetic dysregulation of the *pi6<sup>em1/em1</sup>* sperm genome. *pi6<sup>+/em1</sup>* or *pi6<sup>em1/em1</sup>* sperm heads were individually injected into the cytoplasm of wild-type oocytes (intracytoplasmic sperm injection, or ICSI) (Figure 3B), bypassing the requirement for sperm motility, acrosome reaction, egg binding, or sperm-egg membrane fusion (Kuretake et al., 1996). *pi6<sup>em1/em1</sup>* sperm heads delivered by ICSI fertilized the oocyte at a rate similar to that of *pi6<sup>+/em1</sup>* sperm: 66% of oocytes injected with homozygous mutant *pi6<sup>em1/em1</sup>* sperm heads reached the two-cell stage, compared to 79% for *pi6<sup>+/em1</sup>*. Thus, most *pi6<sup>em1/em1</sup>* nuclei are capable of fertilization.

The steady-state abundance of transposon RNA in *pi6<sup>em1/em1</sup>* testicular germ cells further supports the view that the fertilization defect caused by loss of *pi6* piRNAs does not reflect a failure to silence transposons. We used RNA-seq to measure the abundance of RNA from 1,007 transposons in four distinct germ cell types, purified by fluorescence-activated cell sorting: pachytene spermatocytes (4C), diplotene spermatocytes (4C), secondary spermatocytes (2C), and spermatids (1C). *pi6* piRNAs are plentiful in pachytene spermatocytes onwards (Figure S3B), yet when *pi6* piRNAs

were eliminated, we found no significant changes in steady-state RNA abundance (i.e., an increase or decrease  $\geq 2$ -fold and  $\text{FDR} \leq 0.05$ ) for any transposon family compared to C57BL/6 cells (Figure S3C). We also note that, similar to C57BL/6 testis,  $\gamma\text{H2AX}$  expression is confined to meiotic spermatocytes in *pi6<sup>em1/em1</sup>* testis, indicating absence of DNA damage (data not shown). Together with the rescue of the fertilization defects of *pi6<sup>em1/em1</sup>* sperm by ICSI, these data suggest that transposon silencing is unlikely to be the biological function of *pi6* piRNAs.

### Impaired Motility in *pi6* Mutant Sperm

To assess whether abnormal sperm motility might contribute to *pi6<sup>em1/em1</sup>* male subfertility, we observed freshly extracted caudal epididymal sperm from *pi6<sup>em1/em1</sup>* or C57BL/6 mice for 5 h. Ten minutes after sperm extraction, most *pi6<sup>em1/em1</sup>* sperm moved more slowly than C57BL/6 control sperm (Movies S1 and S2). With time, *pi6<sup>em1/em1</sup>* sperm motility declined more rapidly than C57BL/6 sperm (Movies S3–S10). At 4 and 5 h, most *pi6<sup>em1/em1</sup>* sperm only moved in place and showed signs of agglutination (Movies S8 and S10).

To quantify the differences between *pi6* mutant and control sperm, we used computer-assisted sperm analysis (CASA) to measure *pi6<sup>em2/em2</sup>* sperm motility 10 min after isolation (Mortimer, 2000). While control sperm swam at a path velocity comparable to previously reported ( $110 \pm 50 \mu\text{m/sec}$  for  $221 \pm 75$  cells measured;  $n = 3$ ; Ren et al., 2001), *pi6<sup>em2/em2</sup>* sperm moved at a lower average path velocity ( $80 \pm 60 \mu\text{m/sec}$  for  $232 \pm 57$  cells measured;  $n = 3$ ) (Table 1). Similarly, The *pi6<sup>em2/em2</sup>* sperm also showed less forward, progressive movement (progressive velocity =  $50 \pm 60 \mu\text{m/sec}$  for  $232 \pm 57$  cells measured;  $n = 3$ ) compared to control sperm (progressive velocity =  $70 \pm 50 \mu\text{m/sec}$  for  $221 \pm 75$  cells measured;  $n = 3$ ). For comparison, knockout of *CatSper1* leads to ~65% reduction in path velocity and ~62% reduction in progressive velocity (Ren et al., 2001). As a population, the speed and

progressivity of *pi6* mutant sperm motility patterns varied more widely than control sperm (Movies S1–S10 and Table 1). Lower average path and progressive velocity in sperm populations is linked to worse outcomes in fertilization and pregnancy in IVF (Donnelly et al., 1998). Thus, the slower and less progressive movement in *pi6<sup>em1/em1</sup>* sperm likely contributes to the subfertility of *pi6<sup>em1/em1</sup>* males.

### ***pi6* Mutant Sperm Struggle to Penetrate the Zona Pellucida**

Mammalian spermatozoa stored in the epididymis are dormant. Sperm “capacitate,” i.e., resume maturation, only upon entering the female reproductive tract (de Lamirande et al., 1997). Upon capacitation, sperm become capable of undergoing the acrosome reaction, which is required to bind and penetrate the outer oocyte glycoprotein layer, the zona pellucida (Florman and Storey, 1982; de Lamirande et al., 1997; Jin et al., 2011). To test whether the defect in fertilization by *pi6* mutant sperm was due to impaired binding to or penetration of zona pellucida, we compared IVF using wild-type oocytes with their zona pellucida either intact or removed (Figure 4A). As before,  $10 \pm 6\%$  ( $n = 3$ ) of intact oocytes incubated with *pi6<sup>em1/em1</sup>* sperm reached the two-cell stage, compared to  $94 \pm 5\%$  ( $n = 3$ ) for C57BL/6 sperm (Figure 4B). Strikingly, removing the zona pellucida from the wild-type oocytes fully rescued the fertilization rate of *pi6* mutant sperm:  $92 \pm 7\%$  ( $n = 3$ ) of zona pellucida-free oocytes incubated with *pi6<sup>em1/em1</sup>* sperm reached the two-cell stage, compared to those with intact zona pellucida ( $10 \pm 6\%$ ;  $n = 3$ )

Ex vivo, the acrosome reaction occurs spontaneously in some sperm and can be further triggered by inducing  $\text{Ca}^{2+}$  influx using the ionophore A23187 (Talbot et al., 1976), which results in an acrosome reaction visually indistinguishable from that triggered by natural ligands such as progesterone (Osman et al., 1989) or ZP3 (Arnoult et al., 1996), while bypassing signaling pathways essential for acrosome reaction in vivo (Tateno et al., 2013) (Figure 4C and 4D). The spontaneous acrosome reaction rates for

C57BL/6 ( $19 \pm 3\%$ ;  $n = 3$ ) and *pi6* mutant sperm were similar ( $17 \pm 8\%$ ;  $n = 3$ ).

Acrosome reaction triggered by ionophore-induced  $\text{Ca}^{2+}$  influx differed between the two genotypes:  $45 \pm 14\%$  of *pi6* mutant sperm ( $n = 3$ ) underwent partial or complete reaction, compared to  $66 \pm 6\%$  ( $n = 3$ ) for C57BL/6 (Figure 4C). Our data suggest that *pi6* mutant sperm less effectively undergo an acrosome reaction triggered by ionophore-induced  $\text{Ca}^{2+}$  influx, a defect expected to impair binding and penetrating the zona pellucida.

### Potential Role of Paternal *pi6* piRNAs in Embryo Development

Even when *pi6* sperm successfully fertilize the oocyte, the resulting heterozygous embryos are less likely to complete gestation. Two-cell embryos generated by IVF using heterozygous or homozygous *pi6* mutant or C57BL/6 control sperm were transferred to C57BL/6 surrogate mothers (Figure 5A). At least half of embryos from *pi6*<sup>+/em1</sup> ( $50 \pm 10\%$ ;  $n = 3$ ) or C57BL6 control ( $70 \pm 10\%$ ;  $n = 3$ ) sperm developed to term (Figure 5B), a rate typical for the C57BL/6 background (González-Jara et al., 2017).

The low number of fertilized two-cell embryos produced in IVF using *pi6*<sup>em1/em1</sup> sperm precluded transferring the standard number of embryos to surrogate mothers. For example, in two IVF experiments using *pi6*<sup>em1/em1</sup> sperm, only 5 or 7 embryos could be transferred; the surrogate females failed to become pregnant (Figure 5B and S4A, Trials 1 and 2). In theory, this result might suggest a paternal role for *pi6*. A more mundane explanation is that the low number of embryos transferred reduced the yield of live fetuses, as reported previously (McLaren, 1955; Johnson et al., 1996; González-Jara et al., 2017). We conducted additional experiments to distinguish between these two possibilities. Oocytes were again fertilized by IVF with *pi6*<sup>em1/em1</sup> or C57BL/6 control sperm, and two-cell embryos transferred to surrogate females, but matching the number of embryos transferred to each surrogate for the two sperm genotypes. We used two strategies. First, similar numbers of embryos derived from *pi6*<sup>em1/em1</sup> sperm and filler

embryos derived from control sperm were transferred to separate oviducts (Figure 5B, Trials 3 and 4). Again, fewer embryos developed to term for *pi6<sup>em1/em1</sup>* (17%) compared to control sperm (37%). Second, embryos were mixed before transfer and then equal numbers of embryos, selected randomly, were implanted in each oviduct (Figure 5B, Trial 5). Pups isolated by cesarean section 18.5 days after transfer were genotyped by PCR. In this experiment, only 40% of embryos derived from *pi6<sup>em1/em1</sup>* sperm developed to term, compared to 80% of filler embryos. Finally, in one experiment (Trial 6) where we obtained sufficient numbers of embryos derived from *pi6<sup>em1/em1</sup>* sperm, 10 *pi6<sup>em1/em1</sup>*-derived two-cell embryos were transferred to each oviduct of the surrogate female. Nevertheless, only 15% of the *pi6<sup>em1/em1</sup>*-derived embryos developed to term, compared to 85% of the control.

We also monitored pre-implantation development ex vivo for up to 96 h, a period during which the one-cell embryo develops into a blastocyst. Of all the oocytes incubated with *pi6<sup>em1/em1</sup>* sperm, 40% remained one cell without evidence of a male pronucleus, presumably because they were not fertilized by *pi6<sup>em1/em1</sup>* mutant sperm. Among the remaining 60% oocytes that progressed to at least two-cell stage, which indicated successfully fertilization by *pi6<sup>em1/em1</sup>* sperm, 82% showed delayed development, requiring 48 h to reach the two-cell stage. None of these developed further. Only 3% of fertilized oocytes progressed to the blastocyst stage by 96 h, compared to 98% of oocytes fertilized by C57BL/6 sperm (Figure 5C).

Further support for this idea comes from transfer of embryos generated by ICSI (Figure 5D). ICSI with *pi6<sup>em1/em1</sup>* or *pi6<sup>+/em1</sup>* sperm yielded comparable normal numbers of fertilized oocytes (Figure 3B), so no filler embryos were used; all embryos were transferred into a single oviduct of the surrogate female. In two independent experiments in which embryos generated by ICSI were transferred to surrogate mothers, only 19% of two-cell embryos derived from *pi6<sup>em1/em1</sup>* sperm heads developed to term, compared to 34% for embryos fertilized with *pi6<sup>+/em1</sup>* (Figure 5C). Only four of

seven (57%) surrogate mothers carrying embryos derived from *pi6<sup>em1/em1</sup>* sperm became pregnant. All three surrogate mothers receiving embryos derived from *pi6<sup>+/em1</sup>* sperm became pregnant (Figure S4B).

We note that the live fetuses generated using *pi6<sup>em1/em1</sup>* sperm in IVF or sperm heads in ICSI, like those produced by natural mating using *pi6<sup>em1/em1</sup>* males, showed no obvious morphological abnormalities and grew to adulthood normally when fostered by host mothers. This suggests a direct or indirect requirement for paternal *pi6* piRNAs in early embryogenesis.

### **Changes in Spermatocyte mRNA Abundance Accompany Loss of *pi6* piRNAs**

To characterize the molecular phenotypes of *pi6* and *pi17* mutants, we used RNA-seq to measure steady-state RNA abundance in pachytene spermatocytes, diplotene spermatocytes, secondary spermatocytes, and spermatids purified from *pi6<sup>em1/em1</sup>*, *pi17<sup>-/-</sup>*, and C57BL/6 adult testis (Figure 6A). *pi6* and *pi17* precursor transcripts are abundant in meiotic pachytene spermatocytes (tetraploid), decrease in diplotene spermatocytes, and fall to low levels in post-meiotic spermatids (haploid) (Figure S5B). Compared with C57BL/6 controls, *pi6<sup>em1/em1</sup>* mutants had widespread changes in mRNA abundance in pachytene spermatocytes—481 mRNAs more than doubled, while 394 fell by more than half (FDR  $\leq 0.05$ ; Figure 6B and S5A, and Table S2)—but caused little alteration in mRNA abundance in diplotene spermatocytes, secondary spermatocytes, or spermatids. In contrast, *pi17<sup>-/-</sup>* mutants showed significant changes in mRNA abundance in diplotene (10 mRNAs increased, 267 decreased) and secondary spermatocytes (103 mRNA increased, 400 decreased) but not in pachytene spermatocytes or spermatids (Figure S5A). Among the mRNAs that changed in the diplotene spermatocytes of *pi17<sup>-/-</sup>* mutants, 56% remained different from controls in secondary spermatocytes in these mutants. These data suggest that, despite similar temporal expression, *pi6* piRNAs function primarily in pachytene spermatocytes, while

*pi17* piRNAs may be more important at a later stage of spermatogenesis. Furthermore, 734 (84%) of mRNAs with altered abundance in *pi6<sup>em1/em1</sup>* pachytene spermatocytes were unchanged in any *pi17<sup>-/-</sup>* sorted germ cell type we examined, suggesting that distinct sets of genes are dysregulated in *pi6<sup>em1/em1</sup>* and *pi17<sup>-/-</sup>* mutants.

The abundance of piRNAs from the other four major pachytene piRNA clusters, including *pi17*, was unaffected by loss of *pi6* piRNAs, and loss of neither *pi6* nor *pi17* piRNAs had any significant effect on the abundance of mRNAs encoding piRNA pathway proteins (Table S3), suggesting that the changes in mRNA abundance in *pi6<sup>em1/em1</sup>* or *pi17<sup>-/-</sup>* cells reflect direct regulation of target genes by *pi6* or *pi17* piRNAs or the downstream regulation through the direct targets of these piRNAs.

Gene Ontology (GO) analysis of the 481 up-genes found over 354 significantly enriched GO biological processes ( $FDR \leq 0.01$  and enrichment  $\geq 2$ ). Curiously, 106 of these GO terms correspond to developmental processes that do not normally occur in testis, suggesting a failure to suppress inappropriate programs without *pi6* piRNAs. Similarly, *pi6<sup>em1/em1</sup>* mutants show increased mRNA abundance for 20 transcription factors that normally act in undifferentiated spermatogonia or spermatogonial stem cells or the stem cells of other tissues (Table S4).

The mRNA abundance of several miRNA pathway genes also increased in *pi6<sup>em1/em1</sup>* pachytene spermatocytes, including *Lin28a* (5.6-fold), *Zc3h7b* (5-fold), and *Ajuba* (5.3-fold; Figure S5C) (Dresios et al., 2005; James et al., 2010; Pilotte et al., 2011; Piskounova et al., 2011). LIN28A inhibits *let-7* biogenesis by binding to the loop of pre-*let-7*, blocking its processing by DICER (Piskounova et al., 2008; Hagan et al., 2009; Heo et al., 2009), and *let-7* promotes *Lin28a* degradation by binding two conserved sites in the *Lin28a* 3' untranslated region (Reinhart et al., 2000; Agarwal et al., 2015) predicting that *let-7* levels should fall and *let-7* targets should rise in *pi6<sup>em1/em1</sup>*. Indeed, in *pi6<sup>em1/em1</sup>* adult testis, the aggregate abundance of *let-7a*, *let-7b*, *let-7c*, *let-7e*, *let-7f*, *let-7g*, and *let-7i*, the seven most abundant *let-7* family members ( $\geq 10$  ppm in

wild-type testis) fell to less than half of wild-type, suggesting *pi6* regulation of downstream target genes via *let-7*. Moreover, 48 predicted *let-7* targets (Agarwal et al., 2015) increased in the absence of *pi6<sup>em1/em1</sup>*, including *Lin28a* and the mRNAs encoding three transcription factors: *Sall4* (increased 8.7-fold), *Elf4* (increased 7-fold), and *Pbx2* (increased 6.7-fold). SALL4 is normally expressed in undifferentiated spermatogonia where it represses genes that specify somatic gene expression programs (Gassei and Orwig, 2013; Yamaguchi et al., 2015; Chan et al., 2017). ELF4 has been implicated in regulation of quiescence in hematopoietic stem cells (Lacorazza et al., 2006). Our data suggest that piRNAs, miRNAs, and transcription factors collaborate to ensure precise regulation of gene expression in spermatogenesis.

### **Genes that Function in the Cilium Assembly, Cilium Motility, and Fertilization Pathways Decrease in mRNA Abundance upon Loss of *pi6* piRNAs**

GO analysis of the 394 down-genes revealed only 36 significantly enriched GO biological processes ( $\text{FDR} \leq 0.01$  and fold enrichment  $\geq 2$ ), of which 34 are related to the production and function of sperm and can be organized into four sets (Table S5). One set encompasses broad spermatogenesis terms (e.g., *male gamete generation*, 4.6-fold enriched,  $\text{FDR} = 5.8 \times 10^{-11}$ ; *sperm capacitation*, 12-fold enriched,  $\text{FDR} = 7.4 \times 10^{-3}$ ) while three sets are highly specific and match the in vivo phenotypes of *pi6* mutant males. The first specific set includes *cilium assembly* (6.2-fold enriched,  $\text{FDR} = 4.1 \times 10^{-9}$ ) and *axonemal dynein complex assembly* (18-fold enriched,  $\text{FDR} = 1.1 \times 10^{-5}$ ). The second set contains *sperm motility* (13-fold enriched,  $\text{FDR} = 6.0 \times 10^{-10}$ ) and *cilium movement involved in cell motility* (27-fold enriched,  $\text{FDR} = 2.0 \times 10^{-3}$ ). The third set involves *fertilization* (6.2-fold enriched,  $\text{FDR} = 1.7 \times 10^{-5}$ ) and *binding of sperm to zona pellucida* (12-fold enriched,  $\text{FDR} = 2.3 \times 10^{-3}$ ). None of these three sets of GO terms is enriched in the 481 genes whose mRNA levels increased in *pi6<sup>em1/em1</sup>* pachytene spermatocytes. The three sets of specific GO terms contain 28, 36, and 22 genes

whose mRNAs decreased (63 total and 23 shared between sets; Figure 6C and Table S6). The last two general GO terms—*microtubule-based process* (GO:0007017; with 27 genes whose mRNA abundance declined) and *organelle assembly* (GO:0070925; with 28 genes whose mRNA abundance decreased)—likely gained their enrichment from the large number of genes they share with Cilium assembly and Sperm motility processes (23 and 25 genes for the two GO terms, respectively).

### Master Regulators of Cilium Assembly and Sperm Motility

The 63 Cilium Assembly, Sperm Motility, or Fertility genes with reduced mRNA abundance in *pi6* mutants include two transcription factors, *Rfx2* and *Foxj1*, that act as master regulators of ciliogenesis (Figure 6C). Like *pi6* itself, *Rfx2* transcription is activated by A-MYB, and RFX2 also binds its own promoter (Horvath et al., 2009). Of the genes with decreased mRNA abundance in *pi6<sup>em1/em1</sup>* pachytene spermatocytes, 31 both bind RFX2 and have reduced mRNA abundance in *Rfx2<sup>-/-</sup>* testis, suggesting they are direct targets of RFX2 (Figure 6C and Table S7) (Kistler et al., 2015). Intriguingly, 23 of these 31 RFX2-regulated genes also bind A-MYB (Table S7). *A-Myb* mRNA levels are normal in *pi6<sup>em1/em1</sup>*, which may account for the relatively modest decreases in the mRNA abundance of these 23 genes. Unlike RFX2, the role of FOXJ1 in sperm flagellar assembly has not been extensively studied but its role in general ciliogenesis is well established: *FoxJ1<sup>-/-</sup>* mouse died at or soon after birth due to absence of cilia in multiple organs (Chen et al., 1998; Blatt et al., 1999; Brody et al., 2000; Yu et al., 2008). Six genes—*Tekt4*, *Spa17*, *Drc1*, *Rsph1*, *Meig1*, and *Tsnaxip1*—out of the 394 genes with reduced mRNA abundance in *pi6<sup>em1/em1</sup>* pachytene spermatocytes are regulated by FOXJ1 in ciliogenesis in other tissues (Yu et al., 2008; Stauber et al., 2017). Fourteen genes whose mRNA abundances decrease in *pi6<sup>em1/em1</sup>* are uniquely annotated with the GO term Fertilization (Figure 6C and Table S6). Several are required for sperm to bind the zona pellucida or for acrosome function, including *Acrosin* (halved in *pi6<sup>em1/em1</sup>*

pachytene spermatocytes), *Adam3* (decreased 2.5-fold), *Zbp2* (decreased 3.3-fold), and the FOXJ1-regulated gene *Spa17* (decreased 5-fold). Among the genes with decreased or increased mRNA abundance in *pi6<sup>em1/em1</sup>* cells, 28 have been reported to disrupt mouse or human male fertility or to play a role in spermatogenesis, spermiogenesis, or sperm function (Table S8).

## DISCUSSION

Deletion of the mouse pachytene piRNA *pi6* locus results in specific, quantifiable defects in male fertility. These include impaired sperm mobility and failure in sperm to bind and penetrate the zona pellucida. The male fertility defects accompanying loss of *pi6* piRNAs are specific to this locus, as deletion of the promoter of *pi17*, which eliminates *pi17* piRNAs, had no detectable effect on male or female fertility or viability, as reported previously (Homolka et al., 2015). The phenotypic defects of *pi6* mutants reflect the molecular changes—decreased steady-state abundance of mRNAs encoding proteins that function in ciliary motility and fertilization. Mutations in four of these genes also cause infertility in men. The molecular changes were detected only in pachytene spermatocytes but not in diplotene spermatocytes, secondary spermatocytes, or spermatids. By contrast, RNA-seq for 17.5 dpp or adult *pi6<sup>em1/em1</sup>* testes revealed no changes in mRNA abundance compared to controls. These results underscore the power of analyzing sorted germ cells.

Pachytene piRNAs have been proposed to act collectively in meiotic spermatocytes or post-meiotic spermatids to target mRNAs for destruction (Gou et al., 2014; Goh et al., 2015), but the extent to which piRNAs from different pachytene piRNA loci regulate overlapping sets of targets is unknown. Transcriptome analysis of sorted germ cells from *pi6<sup>em1/em1</sup>* and *pi17<sup>-/-</sup>* mutant mice revealed distinct changes in mRNA abundance, suggesting that, despite the coordinate temporal expression of pachytene piRNAs, individual pachytene piRNA loci regulate distinct sets of genes. Given that *pi6*

produces 95,677 distinct piRNA sequences, the phenotypic specificity of the *pi6* mutant is extraordinary. For both miRNAs and siRNAs, the seed sequence plays a central role in determining a small RNA's regulatory target. Assuming that pachytene piRNAs find their target RNAs by a similar mechanism, the sequence diversity of the small RNAs produced by individual loci is enormous: *pi6* piRNAs encompass 9,880 distinct seed (g2–g8 or 7mer-m8; Bartel, 2009) and 17,304 distinct extended seed sequences (g2–g9) in adult mouse testis, while *pi17* generates 134,358 distinct piRNA sequences, encompassing 11,324 distinct g2–g8 seed and 21,972 distinct g2–g9 seed sequences. Yet, the g2–g9 seed sequences of the 100 most abundant *pi6* piRNAs are not found among the 100 most abundant *pi17* piRNAs. Furthermore, 97 of these *pi6* g2–g9 seed sequences are not found among any of the 100 most-abundant piRNAs produced by *pi2*, *pi7*, *pi9*, or *pi17*. Together with *pi6*, these loci produce more than half of all pachytene piRNAs. The unique seed sequences of the most abundant *pi6* piRNAs are consistent with the lack of compensation of loss of *pi6* piRNAs by other piRNA-producing loci.

We envision that piRNAs from distinct loci target overlapping sets of genes, ensuring robust control of mRNA abundance across spermatogenesis. Our data show that *pi6* piRNAs regulate—directly or by regulating upstream factors—a specific set of mRNAs whose protein products must be eliminated for successful spermiogenesis. In this view, *pi6* piRNAs target mRNAs whose expression must decline at the onset of the pachynema in order to allow new sets of mRNAs to accumulate, such as the RFX2-regulated genes required for ciliogenesis. While we cannot exclude a direct role for piRNAs in activating gene expression or increasing mRNA stability, we note that the overwhelming majority of siRNAs and miRNAs in plants and animals act as repressors not activators.

The phenotypic and molecular specificity of *pi6* may reflect a lower degree of redundancy with other piRNA clusters. Nonetheless other piRNA clusters may partially

rescue the *pi6* phenotype, accounting for the incomplete penetrance of the *pi6* sterility phenotype. Conversely, the lack of a phenotype for other pachytene piRNA clusters may simply reflect greater redundancy with their piRNA-producing peers. Loss of regulation of the targets of *pi17* piRNAs may be compensated by piRNAs from other loci. Testing this hypothesis is clearly a prerequisite for explaining why loss of *pi6* and not *pi17* piRNAs has a measurable biological consequence.

Beyond the requirement for *pi6* piRNAs to produce fully functional sperm, *pi6* piRNAs appear to play an additional role in embryo development. Our data suggest that the arrested development and reduced viability of embryos derived from *pi6* mutant sperm reflects a paternal defect and not the embryonic genotype. Damaged sperm DNA, abnormal sperm chromatin structure, and failure to form a male pronucleus in fertilized embryos have been reported to be linked to retarded embryo development (Sakkas et al., 1998; Borini et al., 2006). Our analysis of transposon RNA abundance in *pi6* mutant germ cells argues against a role for *pi6* piRNAs in transposon silencing during spermatogenesis, but we cannot currently exclude a direct or indirect role for *pi6* piRNAs in silencing transposons in the early embryo (Peaston et al., 2004). Of course, DNA damage might reflect incomplete repair of the double-stranded DNA breaks required for recombination, rather than transposition or transposon-induced illegitimate recombination.

How piRNAs identify their targets remains poorly understood, in part because suitable biochemical or genetic model systems are not available. The availability of a mouse mutant missing a specific set of piRNAs whose absence causes a readily detectable phenotype should provide an additional tool for understanding the base-pairing rules that govern the binding of piRNAs to their RNA targets and for unraveling the regulatory network created by pachytene piRNAs.

## **SUPPLEMENTAL INFORMATION**

Supplemental Information includes Extended Experimental Procedures, Figures S1–5, Tables S1–S7, and Movies S1–S10.

## **AUTHOR CONTRIBUTIONS**

P.H.W., K.C., Y.F., Z.W., and P.D.Z. conceived and designed the experiments. P.H.W. and K.C. performed the experiments. Y.F. analyzed the sequencing data. D.M.Ö generated A-MYB ChIP-seq datasets. P.H.W., Y.F., and P.D.Z. wrote the manuscript.

## **ACKNOWLEDGEMENTS**

We thank P. Cohen and K. Grive at Cornell University for generously sharing protocols and advice on germ cell sorting and meiotic chromosome studies; H. Florman and P. Visconti for sharing protocols and advice on sperm studies; the UMMS Transgenic Animal Modeling Core for advice on fertility test and embryo phenotype; the UMMS FACS core for advice on and help with germ cell sorting; and members of our laboratories for critical comments on the manuscript. This work was supported in part by National Institutes of Health grants GM65236 to P.D.Z. and P01HD078253 to P.D.Z. and Z.W.

## REFERENCES

- Adoyo, P. A., Lea, I. A., Richardson, R. T., Widgren, E. E., and O’Rand, M. G. (1997). Sequence and characterization of the sperm protein Sp17 from the baboon. *Mol Reprod Dev* 47, 66-71.
- Agarwal, V., Bell, G. W., Nam, J. W., and Bartel, D. P. (2015). Predicting effective microRNA target sites in mammalian mRNAs. *eLife* 4, e05005.
- Ahmadi, A., and Ng, S. C. (1999). Fertilizing ability of DNA-damaged spermatozoa. *J Exp Zool* 284, 696-704.
- Antony, D., Becker-Heck, A., Zariwala, M. A., Schmidts, M., Onoufriadis, A., Forouhan, M., Wilson, R., Taylor-Cox, T., Dewar, A., Jackson, C., Goggin, P., Loges, N. T., Olbrich, H., Jaspers, M., Jorissen, M., Leigh, M. W., Wolf, W. E., Daniels, M. L., Noone, P. G., Ferkol, T. W., Sagel, S. D., Rosenfeld, M., Rutman, A., Dixit, A., O’Callaghan, C., Lucas, J. S., Hogg, C., Scambler, P. J., Emes, R. D., Uk10k, Chung, E. M., Shoemark, A., Knowles, M. R., Omran, H., and Mitchison, H. M. (2013). Mutations in CCDC39 and CCDC40 are the major cause of primary ciliary dyskinesia with axonemal disorganization and absent inner dynein arms. *Hum Mutat* 34, 462-472.
- Aravin, A., Gaidatzis, D., Pfeffer, S., Lagos-Quintana, M., Landgraf, P., Iovino, N., Morris, P., Brownstein, M. J., Kuramochi-Miyagawa, S., Nakano, T., Chien, M., Russo, J. J., Ju, J., Sheridan, R., Sander, C., Zavolan, M., and Tuschl, T. (2006). A novel class of small RNAs bind to MILI protein in mouse testes. *Nature* 442, 203-207.

- Aravin, A. A., Lagos-Quintana, M., Yalcin, A., Zavolan, M., Marks, D., Snyder, B., Gaasterland, T., Meyer, J., and Tuschl, T. (2003). The small RNA profile during *Drosophila melanogaster* development. *Dev Cell* 5, 337-350.
- Aravin, A. A., Naumova, N. M., Tulin, A. V., Vagin, V. V., Rozovsky, Y. M., and Gvozdev, V. A. (2001). Double-stranded RNA-mediated silencing of genomic tandem repeats and transposable elements in the *D. melanogaster* germline. *Curr Biol* 11, 1017-1027.
- Aravin, A. A., Sachidanandam, R., Bourc'his, D., Schaefer, C., Pezic, D., Toth, K. F., Bestor, T., and Hannon, G. J. (2008). A piRNA pathway primed by individual transposons is linked to de novo DNA methylation in mice. *Mol Cell* 31, 785-799.
- Arnoult, C., Zeng, Y., and Florman, H. M. (1996). ZP3-dependent activation of sperm cation channels regulates acrosomal secretion during mammalian fertilization. *J Cell Biol* 134, 637-645.
- Avenarius, M. R., Hildebrand, M. S., Zhang, Y., Meyer, N. C., Smith, L. L., Kahrizi, K., Najmabadi, H., and Smith, R. J. (2009). Human male infertility caused by mutations in the CATSPER1 channel protein. *Am J Hum Genet* 84, 505-510.
- Bartel, D. P. (2009). MicroRNAs: target recognition and regulatory functions. *Cell* 136, 215-233.
- Batista, P. J., Ruby, J. G., Claycomb, J. M., Chiang, R., Fahlgren, N., Kasschau, K. D., Chaves, D. A., Gu, W., Vasale, J. J., Duan, S., Conte, D., Luo, S., Schroth, G. P., Carrington, J. C., Bartel, D. P., and Mello, C. C. (2008). PRG-1 and 21U-RNAs interact to form the piRNA complex required for fertility in *C. elegans*. *Mol Cell* 31, 67-78.

Becker-Heck, A., Zohn, I. E., Okabe, N., Pollock, A., Lenhart, K. B., Sullivan-Brown, J., McSheene, J., Loges, N. T., Olbrich, H., Haeffner, K., Fliegauf, M., Horvath, J., Reinhardt, R., Nielsen, K. G., Marthin, J. K., Baktai, G., Anderson, K. V., Geisler, R., Niswander, L., Omran, H., and Burdine, R. D. (2011). The coiled-coil domain containing protein CCDC40 is essential for motile cilia function and left-right axis formation. *Nat Genet* 43, 79-84.

Blatt, E. N., Yan, X. H., Wuerffel, M. K., Hamilos, D. L., and Brody, S. L. (1999). Forkhead transcription factor HFH-4 expression is temporally related to ciliogenesis. *Am J Respir Cell Mol Biol* 21, 168-176.

Bolcun-Filas, E., Bannister, L. A., Barash, A., Schimenti, K. J., Hartford, S. A., Eppig, J. J., Handel, M. A., Shen, L., and Schimenti, J. C. (2011). A-MYB (MYBL1) transcription factor is a master regulator of male meiosis. *Development* 138, 3319-3330.

Bolcun-Filas, E., Hall, E., Speed, R., Taggart, M., Grey, C., de Massy, B., Benavente, R., and Cooke, H. J. (2009). Mutation of the mouse Syce1 gene disrupts synapsis and suggests a link between synaptonemal complex structural components and DNA repair. *PLoS Genet* 5, e1000393.

Borini, A., Tarozzi, N., Bizzaro, D., Bonu, M. A., Fava, L., Flamigni, C., and Coticchio, G. (2006). Sperm DNA fragmentation: paternal effect on early post-implantation embryo development in ART. *Hum Reprod* 21, 2876-2881.

Bourc'his, D., and Bestor, T. H. (2004). Meiotic catastrophe and retrotransposon reactivation in male germ cells lacking Dnmt3L. *Nature* 431, 96-99.

- Bozzetti, M. P., Massari, S., Finelli, P., Meggio, F., Pinna, L. A., Boldyreff, B., Issinger, O. G., Palumbo, G., Ciriaco, C., and Bonaccorsi, S. (1995). The Ste locus, a component of the parasitic cry-Ste system of *Drosophila melanogaster*, encodes a protein that forms crystals in primary spermatocytes and mimics properties of the beta subunit of casein kinase 2. *Proc Natl Acad Sci U S A* 92, 6067-6071.
- Brennecke, J., Aravin, A. A., Stark, A., Dus, M., Kellis, M., Sachidanandam, R., and Hannon, G. J. (2007). Discrete small RNA-generating loci as master regulators of transposon activity in *Drosophila*. *Cell* 128, 1089-1103.
- Brody, S. L., Yan, X. H., Wuerffel, M. K., Song, S. K., and Shapiro, S. D. (2000). Ciliogenesis and left-right axis defects in forkhead factor HFH-4-null mice. *Am J Respir Cell Mol Biol* 23, 45-51.
- Castañeda, J., Genzor, P., van der Heijden, G. W., Sarkeshik, A., Yates, J. R., Ingolia, N. T., and Bortvin, A. (2014). Reduced pachytene piRNAs and translation underlie spermiogenic arrest in Maelstrom mutant mice. *EMBO J* 33, 1999-2019.
- Chan, A. L., La, H. M., Legrand, J. M. D., Mäkelä, J. A., Eichenlaub, M., De Seram, M., Ramialison, M., and Hobbs, R. M. (2017). Germline Stem Cell Activity Is Sustained by SALL4-Dependent Silencing of Distinct Tumor Suppressor Genes. *Stem Cell Reports* 9, 956-971.
- Chen, J., Knowles, H. J., Hebert, J. L., and Hackett, B. P. (1998). Mutation of the mouse hepatocyte nuclear factor/forkhead homologue 4 gene results in an absence of cilia and random left-right asymmetry. *J Clin Invest* 102, 1077-1082.
- Chiriva-Internati, M., Gagliano, N., Donetti, E., Costa, F., Grizzi, F., Franceschini, B., Albani, E., Levi-Setti, P. E., Gioia, M., Jenkins, M., Cobos, E., and Kast, W. M.

- (2009). Sperm protein 17 is expressed in the sperm fibrous sheath. *J Transl Med* 7, 61.
- Chirn, G. W., Rahman, R., Sytnikova, Y. A., Matts, J. A., Zeng, M., Gerlach, D., Yu, M., Berger, B., Naramura, M., Kile, B. T., and Lau, N. C. (2015). Conserved piRNA Expression from a Distinct Set of piRNA Cluster Loci in Eutherian Mammals. *PLoS Genet* 11, e1005652.
- Cole, F., Baudat, F., Grey, C., Keeney, S., de Massy, B., and Jasin, M. (2014). Mouse tetrad analysis provides insights into recombination mechanisms and hotspot evolutionary dynamics. *Nat Genet* 46, 1072-1080.
- Cong, L., Ran, F. A., Cox, D., Lin, S., Barretto, R., Habib, N., Hsu, P. D., Wu, X., Jiang, W., Marraffini, L. A., and Zhang, F. (2013). Multiplex genome engineering using CRISPR/Cas systems. *Science* 339, 819-823.
- Das, P. P., Bagijn, M. P., Goldstein, L. D., Woolford, J. R., Lehrbach, N. J., Sapetschnig, A., Buhecha, H. R., Gilchrist, M. J., Howe, K. L., Stark, R., Matthews, N., Berezikov, E., Ketting, R. F., Tavaré, S., and Miska, E. A. (2008). Piwi and piRNAs act upstream of an endogenous siRNA pathway to suppress Tc3 transposon mobility in the *Caenorhabditis elegans* germline. *Mol Cell* 31, 79-90.
- de Boer, P., de Vries, M., and Ramos, L. (2015). A mutation study of sperm head shape and motility in the mouse: lessons for the clinic. *Andrology* 3, 174-202.
- de Lamirande, E., Leclerc, P., and Gagnon, C. (1997). Capacitation as a regulatory event that primes spermatozoa for the acrosome reaction and fertilization. *Mol Hum Reprod* 3, 175-194.

- Deng, W., and Lin, H. (2002). miwi, a murine homolog of piwi, encodes a cytoplasmic protein essential for spermatogenesis. *Dev Cell* 819-830.
- Donnelly, E. T., Lewis, S. E., McNally, J. A., and Thompson, W. (1998). In vitro fertilization and pregnancy rates: the influence of sperm motility and morphology on IVF outcome. *Fertil Steril* 70, 305-314.
- Dresios, J., Aschrafi, A., Owens, G. C., Vanderklish, P. W., Edelman, G. M., and Mauro, V. P. (2005). Cold stress-induced protein Rbm3 binds 60S ribosomal subunits, alters microRNA levels, and enhances global protein synthesis. *Proc Natl Acad Sci U S A* 102, 1865-1870.
- Ferrer, M., Rodriguez, H., Zara, L., Yu, Y., Xu, W., and Oko, R. (2012). MMP2 and acrosin are major proteinases associated with the inner acrosomal membrane and may cooperate in sperm penetration of the zona pellucida during fertilization. *Cell Tissue Res* 349, 881-895.
- Florman, H. M., and Storey, B. T. (1982). Mouse gamete interactions: the zona pellucida is the site of the acrosome reaction leading to fertilization in vitro. *Dev Biol* 91, 121-130.
- Fu, Y., Wu, P. H., Beane, T., Zamore, P. D., and Weng, Z. (2018). Elimination of PCR duplicates in RNA-seq and small RNA-seq using unique molecular identifiers. *BMC Genomics* 19, 531.
- Gainetdinov, I., Colpan, S., Cecchini, K., and Zamore, P. D. (2018). A Single Mechanism of Biogenesis, Initiated and Directed by PIWI Proteins, Explains piRNA Production in Most Animals. *Mol Cell*, *in press*.

- Gassei, K., and Orwig, K. E. (2013). SALL4 expression in gonocytes and spermatogonial clones of postnatal mouse testes. *PLoS One* 8, e53976.
- Girard, A., Sachidanandam, R., Hannon, G. J., and Carmell, M. A. (2006). A germline-specific class of small RNAs binds mammalian Piwi proteins. *Nature* 442, 199-202.
- Goertz, M. J., Wu, Z., Gallardo, T. D., Hamra, F. K., and Castrillon, D. H. (2011). Foxo1 is required in mouse spermatogonial stem cells for their maintenance and the initiation of spermatogenesis. *J Clin Invest* 121, 3456-3466.
- Goh, W. S., Falciatori, I., Tam, O. H., Burgess, R., Meikar, O., Kotaja, N., Hammell, M., and Hannon, G. J. (2015). piRNA-directed cleavage of meiotic transcripts regulates spermatogenesis. *Genes Dev* 29, 1032-1044.
- González-Jara, P., Fontela, T., López-Mimbela, E., Cereceda, M., Del Olmo, D., and Moreno, M. (2017). Optimization of the balance between effort and yield in unilateral surgical transfer of mouse embryos. *Lab Anim* 51, 622-628.
- Gou, L. T., Dai, P., Yang, J. H., Xue, Y., Hu, Y. P., Zhou, Y., Kang, J. Y., Wang, X., Li, H., Hua, M. M., Zhao, S., Hu, S. D., Wu, L. G., Shi, H. J., Li, Y., Fu, X. D., Qu, L. H., Wang, E. D., and Liu, M. F. (2014). Pachytene piRNAs instruct massive mRNA elimination during late spermiogenesis. *Cell Res* 24, 680-700.
- Grivna, S. T., Beyret, E., Wang, Z., and Lin, H. (2006). A novel class of small RNAs in mouse spermatogenic cells. *Genes Dev* 20, 1709-1714.
- Guichard, C., Harricane, M. C., Lafitte, J. J., Godard, P., Zaegel, M., Tack, V., Lalau, G., and Bouvagnet, P. (2001). Axonemal dynein intermediate-chain gene (DNAI1)

- mutations result in situs inversus and primary ciliary dyskinesia (Kartagener syndrome). *Am J Hum Genet* 68, 1030-1035.
- Hagan, J. P., Piskounova, E., and Gregory, R. I. (2009). Lin28 recruits the TUTase Zcchc11 to inhibit let-7 maturation in mouse embryonic stem cells. *Nat Struct Mol Biol* 16, 1021-1025.
- Han, B. W., Wang, W., Zamore, P. D., and Weng, Z. (2015). piPipes: a set of pipelines for piRNA and transposon analysis via small RNA-seq, RNA-seq, degradome- and CAGE-seq, ChIP-seq and genomic DNA sequencing. *Bioinformatics* 31, 593-595.
- Haueter, S., Kawasumi, M., Asner, I., Brykczynska, U., Cinelli, P., Moisyadi, S., Bürki, K., Peters, A. H., and Pelczar, P. (2010). Genetic vasectomy-overexpression of Prm1-EGFP fusion protein in elongating spermatids causes dominant male sterility in mice. *Genesis* 48, 151-160.
- Heo, I., Joo, C., Kim, Y. K., Ha, M., Yoon, M. J., Cho, J., Yeom, K. H., Han, J., and Kim, V. N. (2009). TUT4 in concert with Lin28 suppresses microRNA biogenesis through pre-microRNA uridylation. *Cell* 138, 696-708.
- Holloway, J. K., Sun, X., Yokoo, R., Villeneuve, A. M., and Cohen, P. E. (2014). Mammalian CNTD1 is critical for meiotic crossover maturation and deselection of excess precrossover sites. *J Cell Biol* 205, 633-641.
- Homolka, D., Pandey, R. R., Goriaux, C., Brasset, E., Vaury, C., Sachidanandam, R., Fauvarque, M. O., and Pillai, R. S. (2015). PIWI Slicing and RNA Elements in Precursors Instruct Directional Primary piRNA Biogenesis. *Cell Rep* 12, 418-428.

- Horani, A., Brody, S. L., Ferkol, T. W., Shoseyov, D., Wasserman, M. G., Ta-shma, A., Wilson, K. S., Bayly, P. V., Amirav, I., Cohen-Cymberknoh, M., Dutcher, S. K., Elpeleg, O., and Kerem, E. (2013). CCDC65 mutation causes primary ciliary dyskinesia with normal ultrastructure and hyperkinetic cilia. *PLoS One* 8, e72299.
- Horvath, G. C., Kistler, M. K., and Kistler, W. S. (2009). RFX2 is a candidate downstream amplifier of A-MYB regulation in mouse spermatogenesis. *BMC Dev Biol* 9, 63.
- Hough, S. R., Thornton, M., Mason, E., Mar, J. C., Wells, C. A., and Pera, M. F. (2014). Single-cell gene expression profiles define self-renewing, pluripotent, and lineage primed states of human pluripotent stem cells. *Stem Cell Reports* 2, 881-895.
- Houwing, S., Kamminga, L. M., Berezikov, E., Cronembold, D., Girard, A., van den Elst, H., Filippov, D. V., Blaser, H., Raz, E., Moens, C. B., Plasterk, R. H., Hannon, G. J., Draper, B. W., and Ketting, R. F. (2007). A role for Piwi and piRNAs in germ cell maintenance and transposon silencing in Zebrafish. *Cell* 129, 69-82.
- Howard, J. M., Nuguid, J. M., Ngole, D., and Nguyen, H. (2014). Tcf3 expression marks both stem and progenitor cells in multiple epithelia. *Development* 141, 3143-3152.
- Iguchi, N., Tanaka, H., Fujii, T., Tamura, K., Kaneko, Y., Nojima, H., and Nishimune, Y. (1999). Molecular cloning of haploid germ cell-specific tektin cDNA and analysis of the protein in mouse testis. *FEBS Lett* 456, 315-321.
- James, V., Zhang, Y., Foxler, D. E., de Moor, C. H., Kong, Y. W., Webb, T. M., Self, T. J., Feng, Y., Lagos, D., Chu, C. Y., Rana, T. M., Morley, S. J., Longmore, G. D., Bushell, M., and Sharp, T. V. (2010). LIM-domain proteins, LIMD1, Ajuba, and

WTIP are required for microRNA-mediated gene silencing. *Proc Natl Acad Sci U S A* *107*, 12499-12504.

Jin, M., Fujiwara, E., Kakiuchi, Y., Okabe, M., Satouh, Y., Baba, S. A., Chiba, K., and Hirohashi, N. (2011). Most fertilizing mouse spermatozoa begin their acrosome reaction before contact with the zona pellucida during in vitro fertilization. *Proc Natl Acad Sci U S A* *108*, 4892-4896.

Johnson, A., Smith, R. G., Bassham, B., Lipshultz, L. I., and Lamb, D. J. (1991). The microspERM penetration assay: development of a sperm penetration assay suitable for oligospermic males. *Fertil Steril* *56*, 528-534.

Johnson, L. W., Moffat, R. J., Bartol, F. F., and Pinkert, C. A. (1996). Optimization of embryo transfer protocol for mice. *Theriogenology* *46*, 1267-1276.

Kistler, W. S., Baas, D., Lemeille, S., Paschaki, M., Seguin-Estevez, Q., Barras, E., Ma, W., Duteyrat, J. L., Morlé, L., Durand, B., and Reith, W. (2015). RFX2 Is a Major Transcriptional Regulator of Spermiogenesis. *PLoS Genet* *11*, e1005368.

Kong, M., Richardson, R. T., Widgren, E. E., and O'Rand, M. G. (1995). Sequence and localization of the mouse sperm autoantigenic protein, Sp17. *Biol Reprod* *53*, 579-590.

Kuretake, S., Kimura, Y., Hoshi, K., and Yanagimachi, R. (1996). Fertilization and development of mouse oocytes injected with isolated sperm heads. *Biol Reprod* *55*, 789-795.

- Lacorazza, H. D., Yamada, T., Liu, Y., Miyata, Y., Sivina, M., Nunes, J., and Nimer, S. D. (2006). The transcription factor MEF/ELF4 regulates the quiescence of primitive hematopoietic cells. *Cancer Cell* 9, 175-187.
- Lau, N. C., Seto, A. G., Kim, J., Kuramochi-Miyagawa, S., Nakano, T., Bartel, D. P., and Kingston, R. E. (2006). Characterization of the piRNA complex from rat testes. *Science* 313, 363-367.
- Lewis, S. E., and Aitken, R. J. (2005). DNA damage to spermatozoa has impacts on fertilization and pregnancy. *Cell Tissue Res* 322, 33-41.
- Lewis, S. H., Quarles, K. A., Yang, Y., Tanguy, M., Frézal, L., Smith, S. A., Sharma, P. P., Cordaux, R., Gilbert, C., Giraud, I., Collins, D. H., Zamore, P. D., Miska, E. A., Sarkies, P., and Jiggins, F. M. (2018). Pan-arthropod analysis reveals somatic piRNAs as an ancestral defence against transposable elements. *Nat Ecol Evol* 2, 174-181.
- Li, X. Z., Roy, C. K., Dong, X., Bolcun-Filas, E., Wang, J., Han, B. W., Xu, J., Moore, M. J., Schimenti, J. C., Weng, Z., and Zamore, P. D. (2013). An ancient transcription factor initiates the burst of piRNA production during early meiosis in mouse testes. *Mol Cell* 50, 67-81.
- Lin, Y. N., Roy, A., Yan, W., Burns, K. H., and Matzuk, M. M. (2007). Loss of zona pellucida binding proteins in the acrosomal matrix disrupts acrosome biogenesis and sperm morphogenesis. *Mol Cell Biol* 27, 6794-6805.
- Liu, D., Matzuk, M. M., Sung, W. K., Guo, Q., Wang, P., and Wolgemuth, D. J. (1998). Cyclin A1 is required for meiosis in the male mouse. *Nat Genet* 20, 377-380.

- Livak, K. J. (1984). Organization and mapping of a sequence on the *Drosophila melanogaster* X and Y chromosomes that is transcribed during spermatogenesis. *Genetics* 107, 611-634.
- Livak, K. J. (1990). Detailed structure of the *Drosophila melanogaster* stellate genes and their transcripts. *Genetics* 124, 303-316.
- Maor-Sagie, E., Cinnamon, Y., Yaacov, B., Shaag, A., Goldsmidt, H., Zenvirt, S., Laufer, N., Richler, C., and Frumkin, A. (2015). Deleterious mutation in SYCE1 is associated with non-obstructive azoospermia. *J Assist Reprod Genet* 32, 887-891.
- McIntyre, B. A., Ramos-Mejia, V., Rampalli, S., Michael, R., Lee, J. H., Alev, C., Sheng, G., and Bhatia, M. (2013). Gli3-mediated hedgehog inhibition in human pluripotent stem cells initiates and augments developmental programming of adult hematopoiesis. *Blood* 121, 1543-1552.
- McLaren, A. M., D (1955). Studies on the transfer of fertilized mouse eggs to uterine foster-mothers. 394-416.
- Mével-Ninio, M., Pelisson, A., Kinder, J., Campos, A. R., and Bucheton, A. (2007). The flamenco locus controls the gypsy and ZAM retroviruses and is required for *Drosophila* oogenesis. *Genetics* 175, 1615-1624.
- Mieusset, R., Fauquet, I., Chauveau, D., Monteil, L., Chassaing, N., Daudin, M., Huart, A., Isus, F., Prouheze, C., Calvas, P., Bieth, E., Bujan, L., and Faguer, S. (2017). The spectrum of renal involvement in male patients with infertility related to excretory-system abnormalities: phenotypes, genotypes, and genetic counseling. *J Nephrol* 30, 211-218.

- Miyata, H., Satouh, Y., Mashiko, D., Muto, M., Nozawa, K., Shiba, K., Fujihara, Y., Isotani, A., Inaba, K., and Ikawa, M. (2015). Sperm calcineurin inhibition prevents mouse fertility with implications for male contraceptive. *Science* 350, 442-445.
- Morris, I. D., Ilott, S., Dixon, L., and Brison, D. R. (2002). The spectrum of DNA damage in human sperm assessed by single cell gel electrophoresis (Comet assay) and its relationship to fertilization and embryo development. *Hum Reprod* 17, 990-998.
- Mortimer D., C. E. F. M. G. (1987). Specific labelling by peanut agglutinin of the outer acrosomal membrane of the human spermatozoon. *J Reprod Fertil* 81, 127-135.
- Mortimer, S. T. (2000). CASA—Practical Aspects. *J Androl* 21, 515-524.
- Nagy, A., Gertsenstein, M. V., K, and Behringer, R. (2003). *Manipulating the Mouse Embryo, a Laboratory Manual*. Cold Spring Harbor Laboratory Press (Cold Spring Harbor, NY).
- Osman, R. A., Andria, M. L., Jones, A. D., and Meizel, S. (1989). Steroid induced exocytosis: the human sperm acrosome reaction. *Biochem Biophys Res Commun* 160, 828-833.
- Palumbo, G., Bonaccorsi, S., Robbins, L. G., and Pimpinelli, S. (1994). Genetic analysis of Stellate elements of *Drosophila melanogaster*. *Genetics* 138, 1181-1197.
- Pasek, R. C., Malarkey, E., Berbari, N. F., Sharma, N., Kesterson, R. A., Tres, L. L., Kierszenbaum, A. L., and Yoder, B. K. (2016). Coiled-coil domain containing 42 (*Ccdc42*) is necessary for proper sperm development and male fertility in the mouse. *Dev Biol* 412, 208-218.

Peaston, A. E., Evsikov, A. V., Graber, J. H., de Vries, W. N., Holbrook, A. E., Solter, D., and Knowles, B. B. (2004). Retrotransposons regulate host genes in mouse oocytes and preimplantation embryos. *Dev Cell* 7, 597-606.

Pélisson, A., Song, S. U., Prud'homme, N., Smith, P. A., Bucheton, A., and Corces, V. G. (1994). Gypsy transposition correlates with the production of a retroviral envelope-like protein under the tissue-specific control of the *Drosophila flamenco* gene. *EMBO J* 13, 4401-4411.

Pilotte, J., Dupont-Versteegden, E. E., and Vanderklish, P. W. (2011). Widespread regulation of miRNA biogenesis at the Dicer step by the cold-inducible RNA-binding protein, RBM3. *PLoS One* 6, e28446.

Piskounova, E., Polytarchou, C., Thornton, J. E., LaPierre, R. J., Pothoulakis, C., Hagan, J. P., Iliopoulos, D., and Gregory, R. I. (2011). Lin28A and Lin28B inhibit let-7 microRNA biogenesis by distinct mechanisms. *Cell* 147, 1066-1079.

Piskounova, E., Viswanathan, S. R., Janas, M., LaPierre, R. J., Daley, G. Q., Sliz, P., and Gregory, R. I. (2008). Determinants of microRNA processing inhibition by the developmentally regulated RNA-binding protein Lin28. *J Biol Chem* 283, 21310-21314.

Prud'homme, N., Gans, M., Masson, M., Terzian, C., and Bucheton, A. (1995). *Flamenco*, a gene controlling the gypsy retrovirus of *Drosophila melanogaster*. *Genetics* 139, 697-711.

Qi, H., Moran, M. M., Navarro, B., Chong, J. A., Krapivinsky, G., Krapivinsky, L., Kirichok, Y., Ramsey, I. S., Quill, T. A., and Clapham, D. E. (2007). All four

- CatSper ion channel proteins are required for male fertility and sperm cell hyperactivated motility. *Proc Natl Acad Sci U S A* *104*, 1219-1223.
- Quinlan, A. R., and Hall, I. M. (2010). BEDTools: a flexible suite of utilities for comparing genomic features. *Bioinformatics* *26*, 841-842.
- Reinhart, B. J., Slack, F. J., Basson, M., Pasquinelli, A. E., Bettinger, J. C., Rougvie, A. E., Horvitz, H. R., and Ruvkun, G. (2000). The 21-nucleotide let-7 RNA regulates developmental timing in *Caenorhabditis elegans*. *Nature* *403*, 901-906.
- Ren, D., Navarro, B., Perez, G., Jackson, A. C., Hsu, S., Shi, Q., Tilly, J. L., and Clapham, D. E. (2001). A sperm ion channel required for sperm motility and male fertility. *Nature* *413*, 603-609.
- Reuter, M., Berninger, P., Chuma, S., Shah, H., Hosokawa, M., Funaya, C., Antony, C., Sachidanandam, R., and Pillai, R. S. (2011). Miwi catalysis is required for piRNA amplification-independent LINE1 transposon silencing. *Nature* *480*, 264-267.
- Richardson, R. T., Yamasaki, N., and O'Rand, M. G. (1994). Sequence of a rabbit sperm zona pellucida binding protein and localization during the acrosome reaction. *Dev Biol* *165*, 688-701.
- Ro, S., Park, C., Song, R., Nguyen, D., Jin, J., Sanders, K. M., McCarrey, J. R., and Yan, W. (2007). Cloning and expression profiling of testis-expressed piRNA-like RNAs. *RNA* *13*, 1693-1702.
- Robert, V., Prud'homme, N., Kim, A., Bucheton, A., and Pélisson, A. (2001). Characterization of the flamenco region of the *Drosophila melanogaster* genome. *Genetics* *158*, 701-713.

- Robine, N., Lau, N. C., Balla, S., Jin, Z., Okamura, K., Kuramochi-Miyagawa, S., Blower, M. D., and Lai, E. C. (2009). A broadly conserved pathway generates 3'UTR-directed primary piRNAs. *Curr Biol* 19, 2066-2076.
- Roy, A., Lin, Y. N., Agno, J. E., DeMayo, F. J., and Matzuk, M. M. (2007). Absence of tektin 4 causes asthenozoospermia and subfertility in male mice. *FASEB J* 21, 1013-1025.
- Roy, A., Lin, Y. N., Agno, J. E., DeMayo, F. J., and Matzuk, M. M. (2009). Tektin 3 is required for progressive sperm motility in mice. *Mol Reprod Dev* 76, 453-459.
- Saito, K., Inagaki, S., Mituyama, T., Kawamura, Y., Ono, Y., Sakota, E., Kotani, H., Asai, K., Siomi, H., and Siomi, M. C. (2009). A regulatory circuit for piwi by the large Maf gene traffic jam in *Drosophila*. *Nature* 461, 1296-1299.
- Sakashita, A., Yeh, Y. V., Namekawa, S. H., and Lin, S. P. (2018). Epigenomic and single-cell profiling of human spermatogonial stem cells. *Stem Cell Investig* 5, 11.
- Sakkas, D., Urner, F., Bizzaro, D., Manicardi, G., Bianchi, P. G., Shoukir, Y., and Campana, A. (1998). Sperm nuclear DNA damage and altered chromatin structure: effect on fertilization and embryo development. *Hum Reprod* 13 Suppl 4, 11-19.
- Saleh, M., Rambaldi, I., Yang, X. J., and Featherstone, M. S. (2000). Cell signaling switches HOX-PBX complexes from repressors to activators of transcription mediated by histone deacetylases and histone acetyltransferases. *Mol Cell Biol* 20, 8623-8633.

- Salzberg, Y., Eldar, T., Karminsky, O. D., Itach, S. B., Pietrokovski, S., and Don, J. (2010). Meig1 deficiency causes a severe defect in mouse spermatogenesis. *Dev Biol* 338, 158-167.
- San Agustin, J. T., Pazour, G. J., and Witman, G. B. (2015). Intraflagellar transport is essential for mammalian spermiogenesis but is absent in mature sperm. *Mol Biol Cell* 26, 4358-4372.
- Selleri, L., DiMartino, J., van Deursen, J., Brendolan, A., Sanyal, M., Boon, E., Capellini, T., Smith, K. S., Rhee, J., Pöpperl, H., Grosveld, G., and Cleary, M. L. (2004). The TALE homeodomain protein Pbx2 is not essential for development and long-term survival. *Mol Cell Biol* 24, 5324-5331.
- Shamsadin, R., Adham, I. M., Nayernia, K., Heinlein, U. A., Oberwinkler, H., and Engel, W. (1999). Male mice deficient for germ-cell cyritestin are infertile. *Biol Reprod* 61, 1445-1451.
- Shawlot, W., Vazquez-Chantada, M., Wallingford, J. B., and Finnell, R. H. (2015). Rfx2 is required for spermatogenesis in the mouse. *Genesis* 53, 604-611.
- Stauber, M., Weidemann, M., Dittrich-Breiholz, O., Lobschat, K., Alten, L., Mai, M., Beckers, A., Kracht, M., and Gossler, A. (2017). Identification of FOXJ1 effectors during ciliogenesis in the foetal respiratory epithelium and embryonic left-right organiser of the mouse. *Dev Biol* 423, 170-188.
- Suzuki, H., Ahn, H. W., Chu, T., Bowden, W., Gassei, K., Orwig, K., and Rajkovic, A. (2012). SOHLH1 and SOHLH2 coordinate spermatogonial differentiation. *Dev Biol* 361, 301-312.

Talbot, P., Summers, R. G., Hylander, B. L., Keough, E. M., and Franklin, L. E. (1976).

The role of calcium in the acrosome reaction: an analysis using ionophore

A23187. *J Exp Zool* 198, 383-392.

Tanaka, H., Iguchi, N., Toyama, Y., Kitamura, K., Takahashi, T., Kaseda, K., Maekawa,

M., and Nishimune, Y. (2004). Mice deficient in the axonemal protein Tektin-t

exhibit male infertility and immotile-cilium syndrome due to impaired inner arm

dynein function. *Mol Cell Biol* 24, 7958-7964.

Tateno, H., Krapf, D., Hino, T., Sánchez-Cárdenas, C., Darszon, A., Yanagimachi, R.,

and Visconti, P. E. (2013). Ca<sup>2+</sup> ionophore A23187 can make mouse

spermatozoa capable of fertilizing in vitro without activation of cAMP-dependent

phosphorylation pathways. *Proc Natl Acad Sci U S A* 110, 18543-18548.

Thépot, D., Weitzman, J. B., Barra, J., Segretain, D., Stinnakre, M. G., Babinet, C., and

Yaniv, M. (2000). Targeted disruption of the murine junD gene results in multiple

defects in male reproductive function. *Development* 127, 143-153.

Truett, G. E., Heeger, P., Mynatt, R. L., Truett, A. A., Walker, J. A., and Warman, M. L.

(2000). Preparation of PCR-quality mouse genomic DNA with hot sodium

hydroxide and tris (HotSHOT). *Biotechniques* 29, 52, 54.

Vogel, P., Hansen, G., Fontenot, G., and Read, R. (2010). Tubulin tyrosine ligase-like 1

deficiency results in chronic rhinosinusitis and abnormal development of

spermatid flagella in mice. *Vet Pathol* 47, 703-712.

Vourekas, A., Zheng, Q., Alexiou, P., Maragkakis, M., Kirino, Y., Gregory, B. D., and

Mourelatos, Z. (2012). Mili and Miwi target RNA repertoire reveals piRNA

- biogenesis and function of Miwi in spermiogenesis. *Nat Struct Mol Biol* 19, 773-781.
- Wang, H., Ge, G., Uchida, Y., Luu, B., and Ahn, S. (2011). Gli3 is required for maintenance and fate specification of cortical progenitors. *J Neurosci* 31, 6440-6448.
- Wasik, K. A., Tam, O. H., Knott, S. R., Falciatori, I., Hammell, M., Vagin, V. V., and Hannon, G. J. (2015). RNF17 blocks promiscuous activity of PIWI proteins in mouse testes. *Genes Dev* 29, 1403-1415.
- Wirschell, M., Olbrich, H., Werner, C., Tritschler, D., Bower, R., Sale, W. S., Loges, N. T., Pennekamp, P., Lindberg, S., Stenram, U., Carlén, B., Horak, E., Köhler, G., Nürnberg, P., Nürnberg, G., Porter, M. E., and Omran, H. (2013). The nexin-dynein regulatory complex subunit DRC1 is essential for motile cilia function in algae and humans. *Nat Genet* 45, 262-268.
- Wong, E. C., Ferguson, K. A., Chow, V., and Ma, S. (2008). Sperm aneuploidy and meiotic sex chromosome configurations in an infertile XYY male. *Hum Reprod* 23, 374-378.
- Xu, M., You, Y., Hunsicker, P., Hori, T., Small, C., Griswold, M. D., and Hecht, N. B. (2008). Mice deficient for a small cluster of Piwi-interacting RNAs implicate Piwi-interacting RNAs in transposon control. *Biol Reprod* 79, 51-57.
- Yamagata, K., Murayama, K., Okabe, M., Toshimori, K., Nakanishi, T., Kashiwabara, S., and Baba, T. (1998). Acrosin accelerates the dispersal of sperm acrosomal proteins during acrosome reaction. *J Biol Chem* 273, 10470-10474.

Yamaguchi, R., Muro, Y., Isotani, A., Tokuhira, K., Takumi, K., Adham, I., Ikawa, M., and Okabe, M. (2009). Disruption of ADAM3 impairs the migration of sperm into oviduct in mouse. *Biol Reprod* 81, 142-146.

Yamaguchi, Y. L., Tanaka, S. S., Kumagai, M., Fujimoto, Y., Terabayashi, T., Matsui, Y., and Nishinakamura, R. (2015). Sall4 is essential for mouse primordial germ cell specification by suppressing somatic cell program genes. *Stem Cells* 33, 289-300.

Yanagimachi, R., Yanagimachi, H., and Rogers, B. J. (1976). The use of zona-free animal ova as a test-system for the assessment of the fertilizing capacity of human spermatozoa. *Biol Reprod* 15, 471-476.

Yu, X., Ng, C. P., Habacher, H., and Roy, S. (2008). Foxj1 transcription factors are master regulators of the motile ciliogenic program. *Nat Genet* 40, 1445-1453.

Zhang, P., Kang, J. Y., Gou, L. T., Wang, J., Xue, Y., Skogerboe, G., Dai, P., Huang, D. W., Chen, R., Fu, X. D., Liu, M. F., and He, S. (2015). MIWI and piRNA-mediated cleavage of messenger RNAs in mouse testes. *Cell Res* 25, 193-207.

Zhang, T., Oatley, J., Bardwell, V. J., and Zarkower, D. (2016). DMRT1 Is Required for Mouse Spermatogonial Stem Cell Maintenance and Replenishment. *PLoS Genet* 12, e1006293.

Zhang, Z., Shen, X., Gude, D. R., Wilkinson, B. M., Justice, M. J., Flickinger, C. J., Herr, J. C., Eddy, E. M., and Strauss, J. F. (2009). MEIG1 is essential for spermiogenesis in mice. *Proc Natl Acad Sci U S A* 106, 17055-17060.

Zheng, K., and Wang, P. J. (2012). Blockade of pachytene piRNA biogenesis reveals a novel requirement for maintaining post-meiotic germline genome integrity. *PLoS Genet* 8, e1003038.

Zheng, K., Wu, X., Kaestner, K. H., and Wang, P. J. (2009). The pluripotency factor LIN28 marks undifferentiated spermatogonia in mouse. *BMC Dev Biol* 9, 38.

Zhou, Q., Liu, M., Xia, X., Gong, T., Feng, J., Liu, W., Liu, Y., Zhen, B., Wang, Y., Ding, C., and Qin, J. (2017). A mouse tissue transcription factor atlas. *Nat Commun* 8, 15089.

## FIGURE LEGENDS

### Figure 1. *pi6<sup>em1/em1</sup>*, *pi6<sup>em2/em2</sup>*, and *pi17<sup>-/-</sup>* promoter deletion in mice

Scissors indicate sites targeted by sgRNAs used to guide the Cas9-catalyzed promoter deletions. RNA-seq was used to measure the steady-state abundance of piRNA primary transcripts, and sequencing of NaIO<sub>4</sub> oxidation-resistant small RNA was used to measure the abundance of mature piRNAs in 17.5 dpp testes.

See also Figure S1 and Table S1.

### Figure 2. Reduced fertility in *pi6<sup>em1/em1</sup>* males by natural mating

(A) Number of litters and pups per litter produced by male mice between 2–8 months of age. (B) Frequency and periodicity of litter production. Each bar represents a litter. (C) Number of embryos produced by males mated with C57BL/6 females. (D) Testis morphology analyzed by hematoxylin and eosin staining. (E) Concentration of sperm from the caudal epididymis.

See also Figure S2.

### Figure 3. Fertilization defects of *pi6<sup>em1/em1</sup>* sperm revealed by IVF and ICSI

(A) Sperm function analyzed by in vitro fertilization (IVF). (B) Sperm function analyzed by intracytoplasmic sperm injection (ICSI).

Thick lines denote the median, and whiskers report the 75<sup>th</sup> and 25<sup>th</sup> percentiles.

See also Figure S3

#### **Figure 4. Impaired motility and zona pellucida-binding in *pi6<sup>em1/em1</sup>* sperm**

**(A)** Strategy for zona-free IVF. **(B)** Comparison of sperm function in standard and zona-free IVF. **(C)** Acrosome reaction triggered with the  $\text{Ca}^{2+}$  ionophore A23187 in vitro. The results using *pi6<sup>em1/em1</sup>* and *pi6<sup>em2/em2</sup>* sperm are combined and indicated. **(D)** Representative caudal epididymal spermatozoa with distinct acrosome reaction status. Green, peanut agglutinin to detect the acrosome; blue, DAPI to detect DNA.

See also Movies S1–S10.

#### **Figure 5. Embryos derived from *pi6<sup>em1/em1</sup>* sperm fail to develop**

**(A)** Strategy for surgical transfer of fertilized two-cell embryos to surrogate mothers. **(B)** Rates of IVF-derived two-cell embryos that developed to term. Each uterine cartoon represents one surrogate mother, and the colored circles represent embryos. The number of embryos transferred to each side of the oviduct is also indicated. **(C)** Development of IVF-derived embryos. Red, the number of embryos that developed to the stage expected for the time after fertilization. **(D)** Rates of ICSI-derived two-cell embryos that developed to term.

See also Figure S4

#### **Figure 6. The abundance of mRNAs encoding proteins required for sperm motility and zona pellucida-binding is decreased in *pi6<sup>em1/em1</sup>* germ cells**

**(A)** Strategy for purifying specific male germ cell types. **(B)** Volcano plots of steady-state transcript abundance in sorted testicular germ cells. Control cells were sorted from C57BL/6 testis. Each dot represents the mean abundance of an mRNA measured using three biologically independent samples. Differentially expressed transcripts ( $\geq 2$  fold-change and  $\leq 0.05$  FDR) are indicated. **(C)** Major GO categories containing enriched

GO terms associated with genes with decreased expression in *pi6<sup>em1/em1</sup>* pachytene spermatocytes (FDR  $\leq 0.01$  and fold enrichment  $\geq 2$ ). Genes annotated for a single category that are discussed in the main text are listed in respective categories. **(D)** RFX2 and A-MYB target genes with significantly decreased mRNA abundance in *pi6<sup>em1/em1</sup>* pachytene spermatocytes and established functions in sperm motility and zona pellucida-binding. ChIP-seq peaks around respective transcription start sites (TSS) are shown. . RFX-2 or A-MYB occupancy is reported as fold enrichment of ChIP-seq reads relative to input.

See also Table S7 for the complete list of genes regulated by *pi6*, RFX2, and A-MYB.

**Table 1.** Sperm motility measured by computer-assisted sperm analysis (CASA)

|                                                          | C57BL/6      |              | <i>pi6<sup>+/em2</sup></i> | Mean $\pm$ SD | <i>pi6<sup>em2/em2</sup></i> |               |               | Mean $\pm$ SD |
|----------------------------------------------------------|--------------|--------------|----------------------------|---------------|------------------------------|---------------|---------------|---------------|
|                                                          | Exp. 1       | Exp. 2       | Exp. 1                     |               | Exp.1                        | Exp. 2        | Exp. 3        |               |
| <b>Cells counted</b>                                     | 271          | 135          | 257                        | n/a           | 273                          | 167           | 257           | n/a           |
| <b>Motile cells</b>                                      | 256          | 106          | 227                        | n/a           | 247                          | 111           | 208           | n/a           |
| <b>Progressive cells</b>                                 | 217          | 87           | 187                        | n/a           | 146                          | 81            | 166           | n/a           |
| <b>Percent motile</b>                                    | 94           | 79           | 83                         | 87 $\pm$ 8    | 90                           | 66            | 81            | 80 $\pm$ 10   |
| <b>Percent progressive</b>                               | 80           | 64           | 73                         | 70 $\pm$ 8    | 53                           | 49            | 65            | 56 $\pm$ 8    |
| <b>Path Velocity (<math>\mu\text{m/s}</math>)</b>        | 110 $\pm$ 50 | 110 $\pm$ 60 | 110 $\pm$ 50               | 110 $\pm$ 50  | 70 $\pm$ 80                  | 80 $\pm$ 40   | 90 $\pm$ 60   | 80 $\pm$ 60   |
| <b>Progressive Velocity (<math>\mu\text{m/s}</math>)</b> | 60 $\pm$ 50  | 50 $\pm$ 60  | 70 $\pm$ 40                | 70 $\pm$ 50   | 50 $\pm$ 70                  | 40 $\pm$ 30   | 50 $\pm$ 60   | 50 $\pm$ 60   |
| <b>Track speed (<math>\mu\text{m/s}</math>)</b>          | 210 $\pm$ 90 | 220 $\pm$ 80 | 200 $\pm$ 100              | 210 $\pm$ 90  | 200 $\pm$ 100                | 210 $\pm$ 100 | 210 $\pm$ 100 | 200 $\pm$ 100 |
| <b>Lateral Amplitude (<math>\mu\text{m}</math>)</b>      | 13 $\pm$ 8   | 13 $\pm$ 7   | 13 $\pm$ 8                 | 13 $\pm$ 8    | 12 $\pm$ 8                   | 13 $\pm$ 7    | 13 $\pm$ 7    | 13 $\pm$ 7    |
| <b>Beat Frequency (%)</b>                                | 30 $\pm$ 10  | 30 $\pm$ 20  | 30 $\pm$ 20                | 30 $\pm$ 20   | 30 $\pm$ 20                  | 40 $\pm$ 20   | 30 $\pm$ 20   | 40 $\pm$ 10   |
| <b>Straightness (%)</b>                                  | 60 $\pm$ 30  | 50 $\pm$ 30  | 60 $\pm$ 30                | 60 $\pm$ 30   | 60 $\pm$ 20                  | 50 $\pm$ 20   | 50 $\pm$ 30   | 50 $\pm$ 20   |

|                                        |         |         |         |            |         |         |         |         |
|----------------------------------------|---------|---------|---------|------------|---------|---------|---------|---------|
| <b>Linearity (%)</b>                   | 30 ± 20 | 30 ± 20 | 40 ± 20 | 30 ± 20    | 30 ± 20 | 20 ± 10 | 20 ± 20 | 20 ± 20 |
| <b>Elongation</b>                      | 40 ± 20 | 40 ± 10 | 40 ± 10 | 40 ± 10    | 40 ± 20 | 40 ± 20 | 40 ± 10 | 40 ± 20 |
| <b>Area (μm<sup>2</sup>)</b>           | 90 ± 80 | 80 ± 50 | 80 ± 60 | 80 ± 70    | 60 ± 40 | 80 ± 60 | 80 ± 60 | 70 ± 50 |
| <b>Rapid cells<br/>(&gt; 50 μm/s)</b>  | 217     | 87      | 187     | n/a        | 146     | 81      | 166     | n/a     |
| <b>Medium cells<br/>(25–50 μm/s)</b>   | 4       | 1       | 3       | n/a        | 9       | 0       | 3       | n/a     |
| <b>Slow cells<br/>(&lt; 25 μm/s)</b>   | 35      | 18      | 37      | n/a        | 92      | 30      | 39      | n/a     |
| <b>Static cells<br/>(&lt; 10 μm/s)</b> | 15      | 29      | 30      | n/a        | 26      | 56      | 49      | n/a     |
| <b>Percent rapid<br/>cells</b>         | 80      | 64      | 73      | 74 ± 8     | 53      | 49      | 65      | 57 ± 8  |
| <b>Percent<br/>medium cells</b>        | 1       | 1       | 1       | 1 ± 0      | 3       | 0       | 1       | 2 ± 2   |
| <b>Percent slow<br/>cells</b>          | 13      | 13      | 14      | 13.4 ± 0.6 | 34      | 18      | 15      | 20 ± 10 |
| <b>Percent static<br/>cells</b>        | 6       | 21      | 12      | 13 ± 8     | 10      | 34      | 19      | 20 ± 10 |

## STAR METHODS

### Mouse mutants

Mice were maintained and sacrificed according to guidelines approved by the Institutional Animal Care and Use Committee of the University of Massachusetts Medical School (A-2222-17).

Small guide RNAs (sgRNAs) flanking piRNA promoters were designed using CRISPR design tools ([crispr.mit.edu/](http://crispr.mit.edu/)). DNA oligos containing guide sequences were cloned into pX330 vectors (Cong et al., 2013), and their cleavage activity tested in NIH3T3 cells by co-transfecting pX330 constructs containing sgRNA sequences and puromycin-resistant plasmid (pPUR) using TransIT-X2 (Mirus Bio, Madison, WI). Puromycin (3 µg/µl) was added 24 h after transfection and DNA extracted 48 h afterwards. Promoter deletions were detected by PCR using primers flanking the predicted Cas9 cleavage sites.

For mice, sgRNAs were generated by in vitro transcription and purified by electrophoresis on 8% (w/v) polyacrylamide gels. To generate the *pi6<sup>em1/em1</sup>* and *pi17<sup>-/-</sup>* lines used in this study, in vitro transcribed sgRNAs (10 ng/µl each) targeting *pi6* and *pi17* were mixed with Cas9 mRNA (40 ng/µl) and injected together into the cytoplasm of one-cell C57BL/6 zygotes (RNA only). For some founders, the sgRNA and Cas9 mRNA mixture was combined with pX330 plasmids expressing the same four sgRNAs and Cas9 and injected into both the cytoplasm and pronuclei of one-cell C57BL/6 zygotes (RNA + DNA). For *pi6<sup>em2/em2</sup>*, in vitro transcribed sgRNAs and Cas9 mRNA were injected into the cytoplasm of one-cell C57BL/6 embryos. Embryos were transferred to pseudopregnant females using standard methods. To screen for mutant founders, DNA was extracted from small pieces of tail clipped from three-week-old pups (Truett et al., 2000). Deletions were detected by PCR, and PCR products purified and cloned into TOPO blunt vectors. Mutant sequences were determined by Sanger sequencing.

## **Mouse fertility test**

Each 2–8 month-old male mouse was housed with one 2–4 month-old C57BL/6 female, who was examined for the presence of a vaginal plug the following morning. When a plug was observed, the female was housed separately. For male mice who did not produce pups after 3 months (~3 cycles), the original female was replaced with a new female and the fertility test continued.

## **Testis histology, sperm count, and sperm morphology**

Mouse testes were fixed in Bouin's solution overnight, washed with 70% ethanol, embedded in paraffin, and sectioned at 5  $\mu$ m thickness. Sections were stained with hematoxylin solution, counterstained with eosin solution, and imaged using Leica DMI8 brightfield microscope equipped with an 20 $\times$  0.4 N.A. objective (HC PL FL L 20 $\times$ /0.40 CORR PH1, Leica Microbiosystems, Buffalo Grove, IL). To quantify sperm abundance, the cauda epididymides were collected from mice and placed in phosphate-buffered saline (PBS) containing 4% (w/v) bovine serum albumin. A few incisions were made in the epididymides with scissors to release the sperm, followed by incubation at 37°C and 5% CO<sub>2</sub> for 20 min. A 20  $\mu$ l aliquot of sperm suspension was diluted in 480  $\mu$ l of 1% (w/v) paraformaldehyde (PFA), and sperm cells counted at 10 $\times$  by brightfield microscopy. To assess sperm morphology, caudal epididymal sperm were fixed in 1% (w/v) PFA, stained with trypan blue, and a Leica DMI8 brightfield microscope equipped with an 63 $\times$  1.4 N.A. oil immersion objective (HC PL APO; Leica Microbiosystems, Buffalo Grove, IL). Sperm stained with Alexa 488-conjugated PNA (see below) were also used to assess sperm morphology.

## **Meiotic chromosome spreads**

Meiotic chromosome spreads were prepared as described (Holloway et al., 2014). Mouse testes were incubated in hypotonic buffer (30 mM Tris-Cl, pH 8.2, 50 mM

sucrose, 17 mM sodium citrate, 5 mM EDTA, 0.5 mM DTT) for 30 min on ice, then small fragments of seminiferous tubules were moved to 100 mM sucrose solution and pulled apart with forceps to release germ cells. A drop of sucrose solution containing germ cells was pipetted onto a glass slide with a thin layer of 1× PBS containing 1% PFA and 0.15% (v/v) Triton-X100 (pH 9.2) and spread by swirling. Slides were placed in a humidifying chamber for 2.5 h, air-dried, and washed twice with 1× PBS with 0.4% Photo-Flo 200 (Kodak, Rochester, NY) and once with water with 0.4% Photo-Flo 200, and air-dried. For immunostaining of meiotic chromosomes, slides were sequentially washed with (1) 1× PBS with 0.4% Photo-Flo 200, (2) 1× PBS containing 0.1% (v/v) Triton-X, and (3) blocked with PBS containing 3% (w/v) BSA, 0.05% (v/v) Triton X-100, and 10% (v/v) goat serum in 1× PBS at room temperature. The slides were then incubated with primary antibodies, anti-SCP1 (1:1000 dilution) and anti-SCP3 (1:1000 dilution), in a humidifying chamber overnight at room temperature. Washing and blocking steps were repeated the next day, and the slides were incubated with Alexa 488- or Alexa 594-conjugated secondary antibodies (1:10,000 dilution) for 1 h at room temperature. Slides were washed thrice with 1× PBS containing 0.4% (v/v) Photo-Flo 200, once with water containing 0.4% Photo-Flo 200 mixture, air-dried in the dark, mounted by incubation in ProLong Gold Antifade Mountant with DAPI (4',6'-diamidino-2-phenylindole; Thermo Fisher Scientific, Waltham, MA) overnight in the dark, and imaged using a Leica DMI8 fluorescence microscope equipped with an 63× 1.4 N.A. oil immersion objective (HC PL APO; Leica Microbiosystems, Buffalo Grove, IL).

### **Cell sorting by FACS**

Testicular cell sorting was performed as described (Cole et al., 2014). Testes were collected, decapsulated, and incubated in 0.4 mg/ml collagenase type IV (Worthington LS004188) in 1× Grey's Balanced Salt Solution (GBSS, Sigma, G9779) at 33°C rotating at 150 rpm for 15 min. Separated seminiferous tubules were washed with 1× GBSS and

incubated in 0.5 mg/ml Trypsin and 1 µg/ml DNase I in 1× GBSS at 33°C rotated at 150 rpm for 15 min. Tubules were dissociated on ice by gentle pipetting, and then 7.5% (v/v) fetal bovine serum (f.c.) was added to inactivate trypsin. The cell suspension was filtered through a pre-wetted 70 µm cell strainer, and cells pelleted at 300 × g for 10 min at 4°C. Cells were resuspended in 1× GBSS containing 5% (v/v) FBS, 1 µg/ml DNase I, and 5 µg/ml Hoechst 33342 (Thermo Fisher Scientific, Waltham, MA) and rotated at 150 rpm at 33°C for 45 min. Propidium iodide (0.2 µg/ml, f.c.; Thermo Fisher Scientific, Waltham, MA) was added, and cells strained through a pre-wetted 40 µm cell strainer. Cell sorting was performed on a FACS Aria II (BD Biosciences, Franklin Lakes, NJ). The purity of sorted fractions was assessed by immunostaining. Secondary spermatocyte and spermatid populations were >90% pure, and the pachytene spermatocytes and diplotene spermatocytes were >80% pure.

### **In vitro fertilization (IVF) and embryo transfer**

In vitro fertilization was performed as previously described (Nagy et al., 2003) using spermatozoa from caudal epididymis of either C57BL/6, *pi6<sup>+/em1</sup>*, or *pi6<sup>em1/em1</sup>* mice. Spermatozoa were incubated in human tubal fluid (HTF; 101.6 mM NaCl, 4.69 mM KCl, 0.37mM KH<sub>2</sub>PO<sub>4</sub>, 0.2 mM MgSO<sub>4</sub>·7H<sub>2</sub>O, 21.4 mM Na-lactate, 0.33 mM Na-pyruvate, 2.78 mM glucose, 25 mM NaHCO<sub>3</sub>, 2.04 mM CaCl<sub>2</sub>·2H<sub>2</sub>O, 0.075 mg/ml Penicillin-G, 0.05 mg/ml streptomycin sulfate, 0.02% (v/v) phenol red, 4 mg/ml BSA) with oocytes (98–146 for control sperm and 120–293 for *pi6<sup>em1/em1</sup>* sperm) from B6SJLF1/J mice for 3–4 h at 37°C with constant 5% O<sub>2</sub>, 90% N<sub>2</sub>, and 5% CO<sub>2</sub> concentration. Oocyte viability and the presence of pronuclei were assessed under a Nikon SMZ-2B (Nikon, Tokyo, Japan) dissecting microscope. To observe embryo development, embryos were moved into potassium-supplemented simplex optimized media (KSOM; 95 mM NaCl, 2.5 mM KCl, 0.35 mM KH<sub>2</sub>PO<sub>4</sub>, 0.2 mM MgSO<sub>4</sub>·7H<sub>2</sub>O, 10 mM Na-lactate, 0.2 mM Na-pyruvate, 0.2 mM glucose, 25 mM NaHCO<sub>3</sub>, 1.71 mM CaCl<sub>2</sub>·2H<sub>2</sub>O, 1 mM L-glutamine, 0.01 mM

EDTA, 0.075 mg/ml Penicillin-G, 0.05 mg/ml streptomycin sulfate, 0.02% (v/v) phenol red, 1 mg/ml BSA; Millipore Sigma, Burlington, MA) after IVF and assessed every 24 h. To measure birth rates, two-cell embryos were transferred to Swiss Webster pseudopregnant females, and fetuses isolated by cesarean section 18.5 d after embryo transfer.

For zona-free IVF, the zona pellucida of oocytes was removed with acid Tyrode's solution as described (Yanagimachi et al., 1976; Johnson et al., 1991).

### **Intracytoplasmic sperm injection (ICSI)**

Frozen caudal epididymal spermatozoa were thawed, the sperm tails detached (Nagy et al., 2003), and individual *pi6<sup>+/-em1</sup>* or *pi6<sup>em1/em1</sup>* sperm heads injected into B6D2F1/J oocytes in Chatot-Ziomek-Bavister media (CZB; 81.62 mM NaCl, 4.83 mM KCl, 1.18 mM KH<sub>2</sub>PO<sub>4</sub>, 1.18 mM MgSO<sub>4</sub>·7H<sub>2</sub>O, 25 mM Na<sub>2</sub>HCO<sub>3</sub>, 1.70 mM CaCl<sub>2</sub>·2H<sub>2</sub>O, 0.11 mM Na<sub>2</sub>-ETDA·2H<sub>2</sub>O, 1 mM L-glutamine, 28 mM Na-lactate, 0.27 mM Na-pyruvate, 5.55 mM glucose, Penicillin-G 0.05 mg/ml, 0.07 mg/ml streptomycin sulfate, 4 mg/ml BSA) (Millipore Sigma, Burlington, MA) using the PiezoXpert (Eppendorf, Hamburg, Germany; Cat#5194000024). Surviving oocytes were counted, collected, and cultured in KSOM (Millipore Sigma, Burlington, MA) at 37°C and 5% CO<sub>2</sub> for 24 h. Two-cell embryos were surgically transferred unilaterally into the oviducts of pseudopregnant Swiss Webster females. At 16.5 days after the surgery, live fetus isolated by cesarean section.

### **Sperm motility**

Cauda epididymal sperm were collected from mice and placed in 37°C HTF media in an incubator with 5% CO<sub>2</sub>. A drop of sperm was removed from the suspension and pipetted into a sperm counting glass chamber, then assayed by CASA or video acquisition. CASA was conducted using an IVOS II instrument (Hamilton Thorne, Beverly, MA) with the following settings: 100 frames acquired at 60 Hz; minimal

contrast = 50; 4 pixel minimal cell size; minimal static contrast = 5; 0%straightness (STR) threshold; 10  $\mu\text{m/s}$  VAP Cutoff; prog. min VAP, 20  $\mu\text{m/s}$ ; 10  $\mu\text{m/s}$  VSL Cutoff; 5 pixel cell size; cell intensity = 90; static head size = 0.30–2.69; static head intensity = 0.10–1.75; static elongation = 10–94; slow cells motile = yes; 0.68 magnification; LED illumination intensity = 3000; IDENT illumination intensity = 3603; 37°C. Agglutination of *pi6<sup>em1/em1</sup>* sperm prevented CASA measurements at later times. A Nikon Diaphot 200 microscope (Nikon, Tokyo, Japan) with darkfield optics equipped with Nikon E Plan 10 $\times$ /0.25 160/- Ph1 DL objective (Nikon, Tokyo, Japan), ZWO ASI 174mm Monochrome CMOS Imaging camera (ZWO, SuZhou, China), and the SharpCap software (<https://docs.sharpcap.co.uk/2.9/>) using darkfield at 10 $\times$  magnification were used to record sperm movement at 37°C.

### **In vitro acrosome reaction assay**

Acrosome reaction was assessed as described (Talbot et al., 1976). Cauda epididymides were collected from mice, placed in HTF media pre-warmed for at least 2 h in a 37°C incubator at 5% CO<sub>2</sub>. A few incisions were made in the epididymides with scissors to release the sperm, followed by incubation at 37°C in 5% CO<sub>2</sub> for 90 min. Calcium ionophore A23187 (10  $\mu\text{M}$  f.c. in DMSO) was added, and incubation continued for 30 min. Sperm were fixed at room temperature for 10 min by adding two volumes of 4% (w/v) PFA, pelleting at 1,000  $\times g$  for 5 min, washed with 1 $\times$  PBS, resuspended in fresh 1 $\times$  PBS, spotted on a glass slide, and air-dried. Methanol was pipetted onto the sperm to permeabilize the cells, followed by washing with 1 $\times$  PBS. Slides were incubated overnight in 10  $\mu\text{g/ml}$  Alexa Fluor 488-conjugated peanut agglutinin (PNA) in 1 $\times$  PBS (Mortimer D., 1987), washed with 1 $\times$  PBS, air-dried, and mounted with ProLong Gold Antifade Mountant with DAPI (Thermo Fisher Scientific, Waltham, MA). Sperm were imaged using a Leica DMI8 fluorescence microscope equipped with a 63 $\times$  1.4 N.A.

oil immersion objective (HC PL APO; Leica Microbiosystems, Buffalo Grove, IL) and analyzed using ImageJ (version 2.0.0-rc-68/1.52e; <https://fiji.sc/>).

### **Chromatin Immunoprecipitation (ChIP) and sequencing**

Frozen testes were cross-linked with 2% (w/v) formaldehyde at room temperature for 30 min using an end-over-end tumbler. Fixed tissues were homogenized in buffer containing 1% (w/v) sodium lauryl sulfate (SDS), 10mM EDTA, and 50mM Tris-HCl (pH 8.1) by 40 strokes in a Dounce tissue grinder with Pestle B (Kimble-Chase, Rockwood, TN). Lysed samples were sonicated using the E220 Covaris ultrasonicator (Covaris, Woburn, MA) to shear the chromatin to 150–200 bp fragments and diluted 1:10 with a buffer containing 0.01% (w/v) SDS, 1.1% (v/v) Triton X-100, 1.2 mM EDTA, 16.7 mM Tris-HCl (pH 8.1), 167 mM NaCl. Immunoprecipitation was performed using 5.5 µg of rabbit anti-A-MYB antibody (Sigma, St. Louis, MO), DNA was extracted with phenol:chloroform:isoamyl alcohol (25:24:1) (pH 8), and ChIP-seq libraries were prepared as previously described (Li et al., 2013). Libraries were sequenced using paired-end reading on NextSeq500 (Illumina, San Diego, CA), and reads were mapped to mouse genome assembly mm10 using Bowtie2 (v2.2.5). ChIP-seq peaks were determined using MACS2 (v2.1.1) and unique mapping reads were reported in this study as fold enrichment over input.

### **RNA-seq and small RNA-seq**

Small RNA-seq and RNA-seq libraries were constructed and sequenced using NextSeq 500 (Illumina, San Diego, CA) as described (Fu et al., 2018). To sequence mature piRNAs, small RNA was oxidized with 25 mM NaIO<sub>4</sub> in 30 mM sodium borate, 30 mM boric acid (pH 8.6; Sigma Aldrich, St. Louis, MO) at 25°C for 30 min. RNA was precipitated with ethanol before adapter ligation. Small RNA-seq and RNA-seq reads were mapped to mouse genome assembly mm10 using piPipes (Han et al., 2015).

Transcript abundance between *pi6*<sup>+/em1</sup> and C57BL/6 testes were indistinguishable (< 2-fold change and FDR > 0.05). Transcripts with low abundance (< 1 fpkm) in both C57BL/6 and *pi6*<sup>em1/em1</sup> cells were excluded.

## Transposon mapping

RNA-seq reads were intersected using BEDtools (Quinlan and Hall, 2010) with Repeat Masker annotation from UCSC (downloaded from <https://genome.ucsc.edu/cgi-bin/hgTables>). Reads mapping to multiple genomic locations were apportioned. Reads for individual repeats were aggregated to obtain reads counts for repeat families.

## Statistics

All statistics were performed using R (<https://www.rstudio.com/>) and graphs were generated using Igor Pro v7.08 (WaveMetrics) or ggplot2 v3.0.0 (<https://ggplot2.tidyverse.org/>). Unless otherwise stated, Mann-Whitney-Wilcoxon test was used to calculate *p* values.

## ACCESSION NUMBERS

All sequencing data are available through the NCBI Sequence Read Archive using accession number PRJNA480354.

## SUPPLEMENTAL FIGURE, TABLE, AND MOVIES

### Supplemental Figure Legends

#### Figure S1. Confirmation of mutant founder genotypes. Related to Figure 1 and Table S1.

(A) Genotyping of mutant founders by PCR. Genomic sequences of *pi6* promoter region in *pi6<sup>em1/em1</sup>* (B) and *pi6<sup>em2/em2</sup>* (C) mouse lines. (D) Genomic sequences of *pi17* promoter region in *pi17<sup>-/-</sup>* mouse lines. Dashes, genomic sequences deleted by CRISPR; dots, unaltered sequence omitted for clarity.

#### Figure S2. *pi6<sup>em1/em1</sup>* adult male phenotype. Related to Figure 2.

(A) Number of litters produced in 6 months by 2–8 month-old males. (B) Body and testis weight of 2–4 month-old *pi6<sup>em1/em1</sup>* and *pi6<sup>em2/em2</sup>* males. Each dot represents an individual mouse. The thick lines denote median values, and whiskers indicate the 75<sup>th</sup> and 25<sup>th</sup> percentiles. (C) Representative spermatozoon. (D) Representative patterns of meiotic chromosome synapsis in *pi6<sup>em1/em1</sup>* pachytene spermatocytes. SYCP1, Synaptonemal complex protein 1; SYCP3, Synaptonemal complex protein 3. (E) Quantification of patterns of meiotic chromosome synapsis depicted in (D).

#### Figure S3. Abundance of transposons in *pi6<sup>em1/em1</sup>* germ cells. Related to Figure 3.

(A) Proportions of the whole genome or piRNA sequences composed of repetitive sequences. (B) Abundance of repetitive sequences in mouse germ cells. A pseudocount of 1 was added to each value. Each dot represents the mean value of three biologically independent RNA-seq experiments.

**Figure S4. Pregnancy rate of surrogate mothers in IVF and ICSI experiments.**

**Related to Figure 5.**

Percent of pregnant surrogate mothers in IVF **(A)** and ICSI **(B)**.

**Figure S5. Transcriptome changes in *pi6<sup>em1/em1</sup>* cells. Related to Figure 6.**

**(A)** Number of altered genes with mRNA abundance altered by  $\geq 2$ -fold with  $FDR \leq 0.05$  in indicated cell types. **(B)** Abundance of pachytene piRNAs and their precursors in C75BL/6 purified germ cells. For piRNA precursor levels, each dot represents the mean value of triplicate datasets and each error bar indicates the standard deviation. For mature piRNAs, each dot represents the mean abundance of unique-mapping reads of two duplicate datasets. **(C)** mRNAs with altered abundance in *pi6<sup>em1/em1</sup>* cells and encoding protein with functions in meiotic chromosome organization and miRNA-mediated regulation.

## Supplemental Table Legends

**Table S1. Statistics of CRISPR injection for *pi6* mutant generation. Related to Figure 1 and S1.**

**Table S2. Differentially expressed genes in *pi6<sup>em1/em1</sup>* germ cells. Related to Figure 6 and S5.**

Mean abundance (fpkm) of significantly altered mRNAs ( $\geq 2$ -fold change  $\cap$  FDR 0.05) in C57BL/6 versus *pi6<sup>em1/em1</sup>* cells of RNA-seq triplicate datasets. A pseudocount of 0.5 was added to each value to calculate the differences. Transcripts with  $< 1$  rpkm in both C57BL/6 and *pi6<sup>em1/em1</sup>* cells prior to adding pseudocount were excluded.

**Table S3. Expression of piRNA pathway genes in *pi6<sup>em1/em1</sup>* cells. Related to Figure 6 and S5**

Mean expression (fpkm) of piRNA genes in C57BL/6 versus *pi6<sup>em1/em1</sup>* cells of RNA-seq triplicate datasets. A pseudocount of 0.5 was added to each value to calculate the differences. Significant changes were  $\geq 2$ -fold increase or decrease and FDR  $\leq 0.05$ .

**Table S4. Transcription factors with altered mRNA abundance in *pi6<sup>em1/em1</sup>* pachytene spermatocytes. Related to Figure 6 and S5.**

**Table S5. Gene Ontology of genes with decreased expression in *pi6<sup>em1/em1</sup>* pachytene spermatocytes. Related to Figure 6 and S5.**

**Table S6. Genes with reduced expression in *pi6<sup>em1/em1</sup>* pachytene spermatocytes that are mapped to major Gene Ontology categories.**

**Related to Figure 6 and S5.**

**Table S7. RFX2 and A-MYB target genes with decreased abundance in *pi6<sup>em1/em1</sup>* pachytene spermatocytes.**

**Related to Figure 6 and S5.**

**Table S8. Published male fertility genes with altered expression in *pi6<sup>em1/em1</sup>* cells.**

**Related to Figure 6 and S5.**

## Legends to Movies

### Movies S1-10. *pi6<sup>em1/em1</sup>* sperm motility.

**Movie S1.** C57BL/6 sperm motility at 10 minute time point.

**Movie S2.** *pi6<sup>em1/em1</sup>* sperm motility at 10 minute time point.

**Movie S3.** C57BL/6 sperm motility at 90 minute time point.

**Movie S4.** *pi6<sup>em1/em1</sup>* sperm motility at 90 minute time point.

**Movie S5.** C57BL/6 sperm motility at 3 hour time point.

**Movie S6.** *pi6<sup>em1/em1</sup>* sperm motility at 3 hour time point

**Movie S7.** C57BL/6 sperm motility at 4 hour time point.

**Movie S8.** *pi6<sup>em1/em1</sup>* sperm motility at 4 hour time point.

**Movie S9.** C57BL/6 sperm motility at 5 hour time point.

**Movie S10.** *pi6<sup>em1/em1</sup>* sperm motility at 5 hour time point.

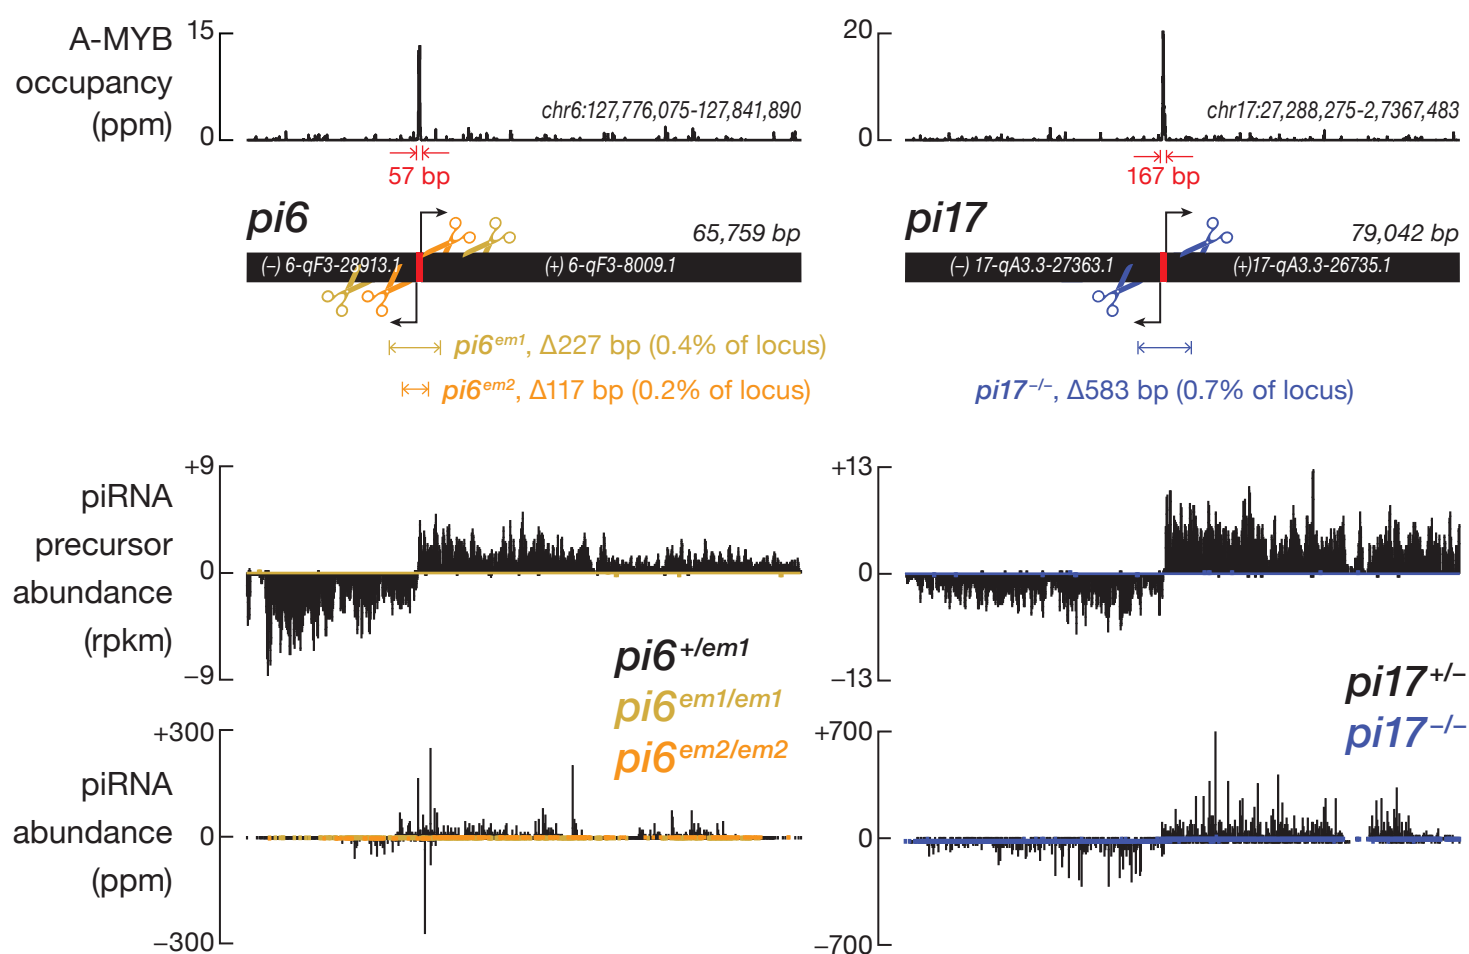

bioRxiv preprint doi: <https://doi.org/10.1101/386201>; this version posted August 7, 2018. The copyright holder for this preprint (which was not certified by peer review) is the author/funder, who has granted bioRxiv a license to display the preprint in perpetuity. It is made available under aCC-BY-NC-ND 4.0 International license.

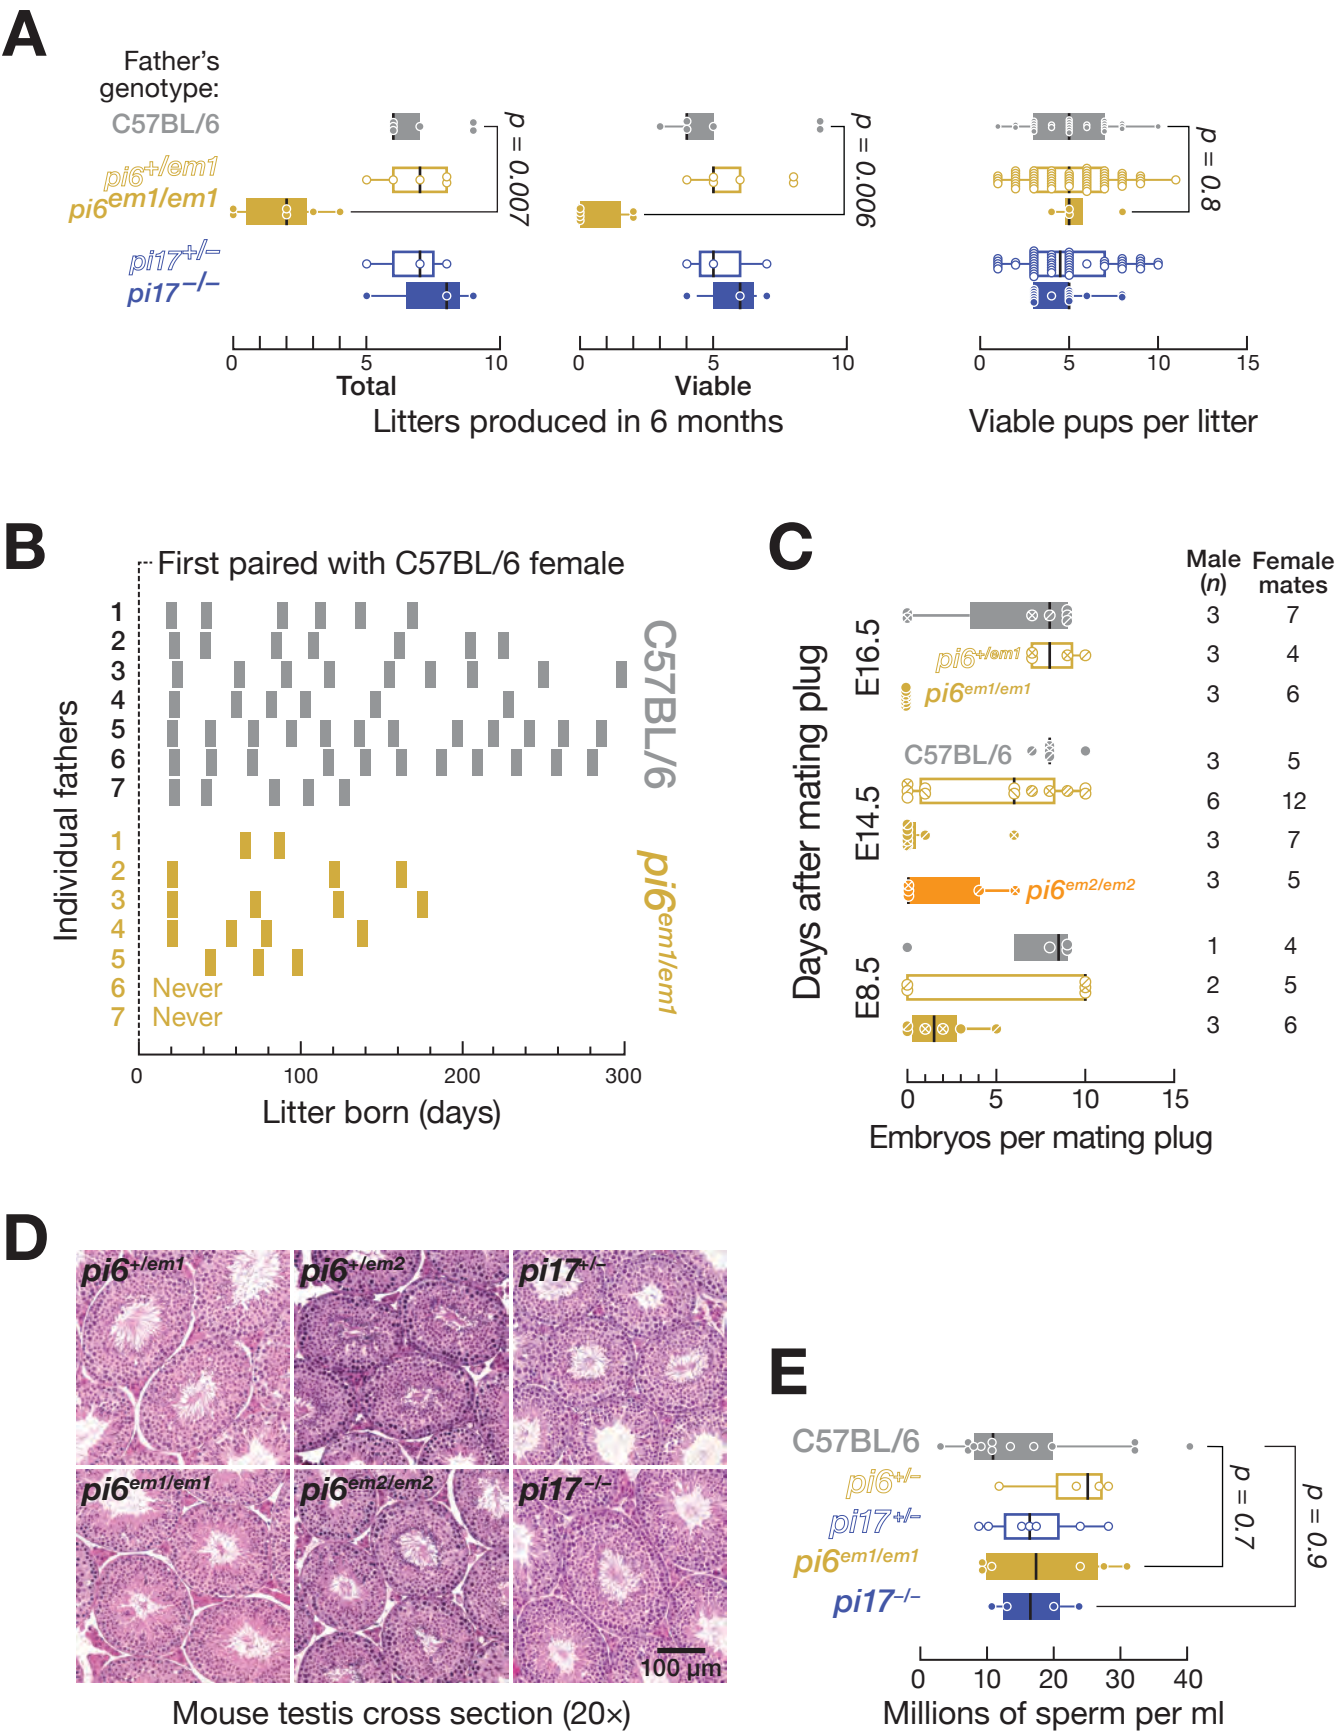

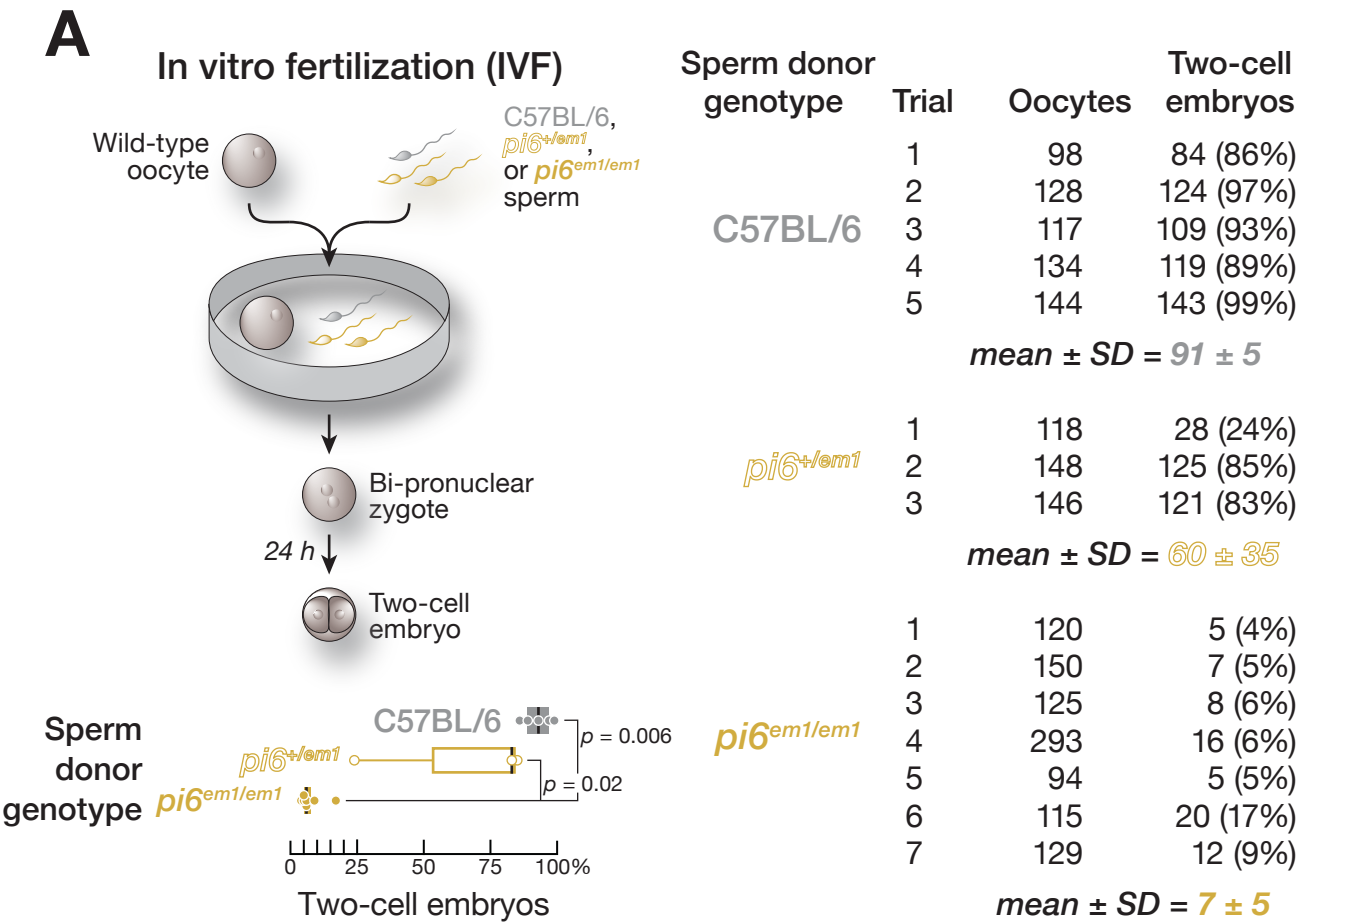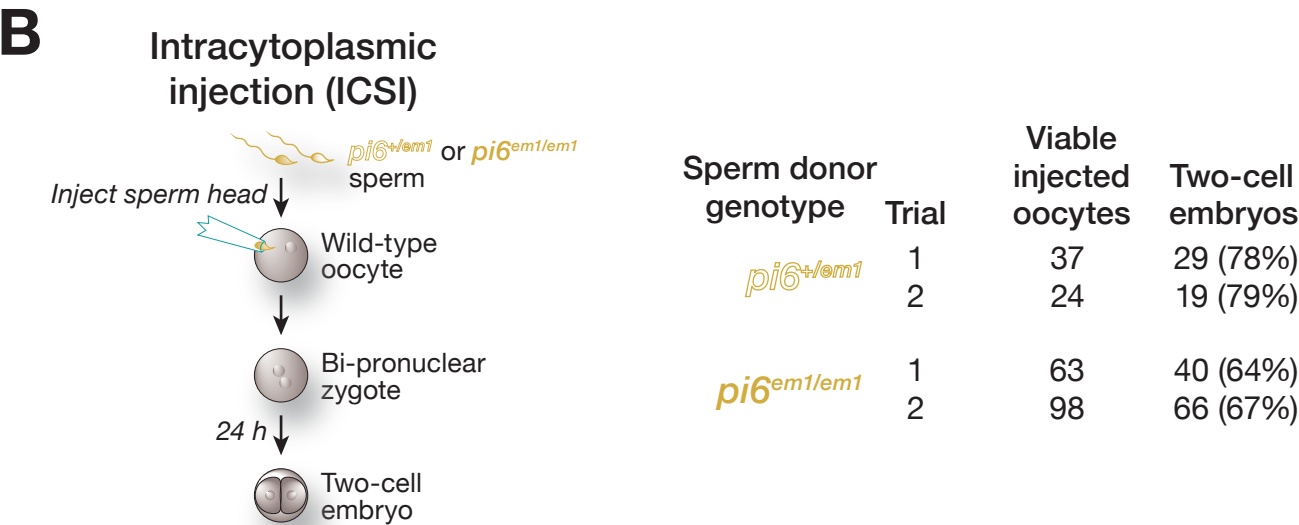

bioRxiv preprint doi: <https://doi.org/10.1101/386201>; this version posted August 7, 2018. The copyright holder for this preprint (which was not certified by peer review) is the author/funder, who has granted bioRxiv a license to display the preprint in perpetuity. It is made available under aCC-BY-NC-ND 4.0 International license.

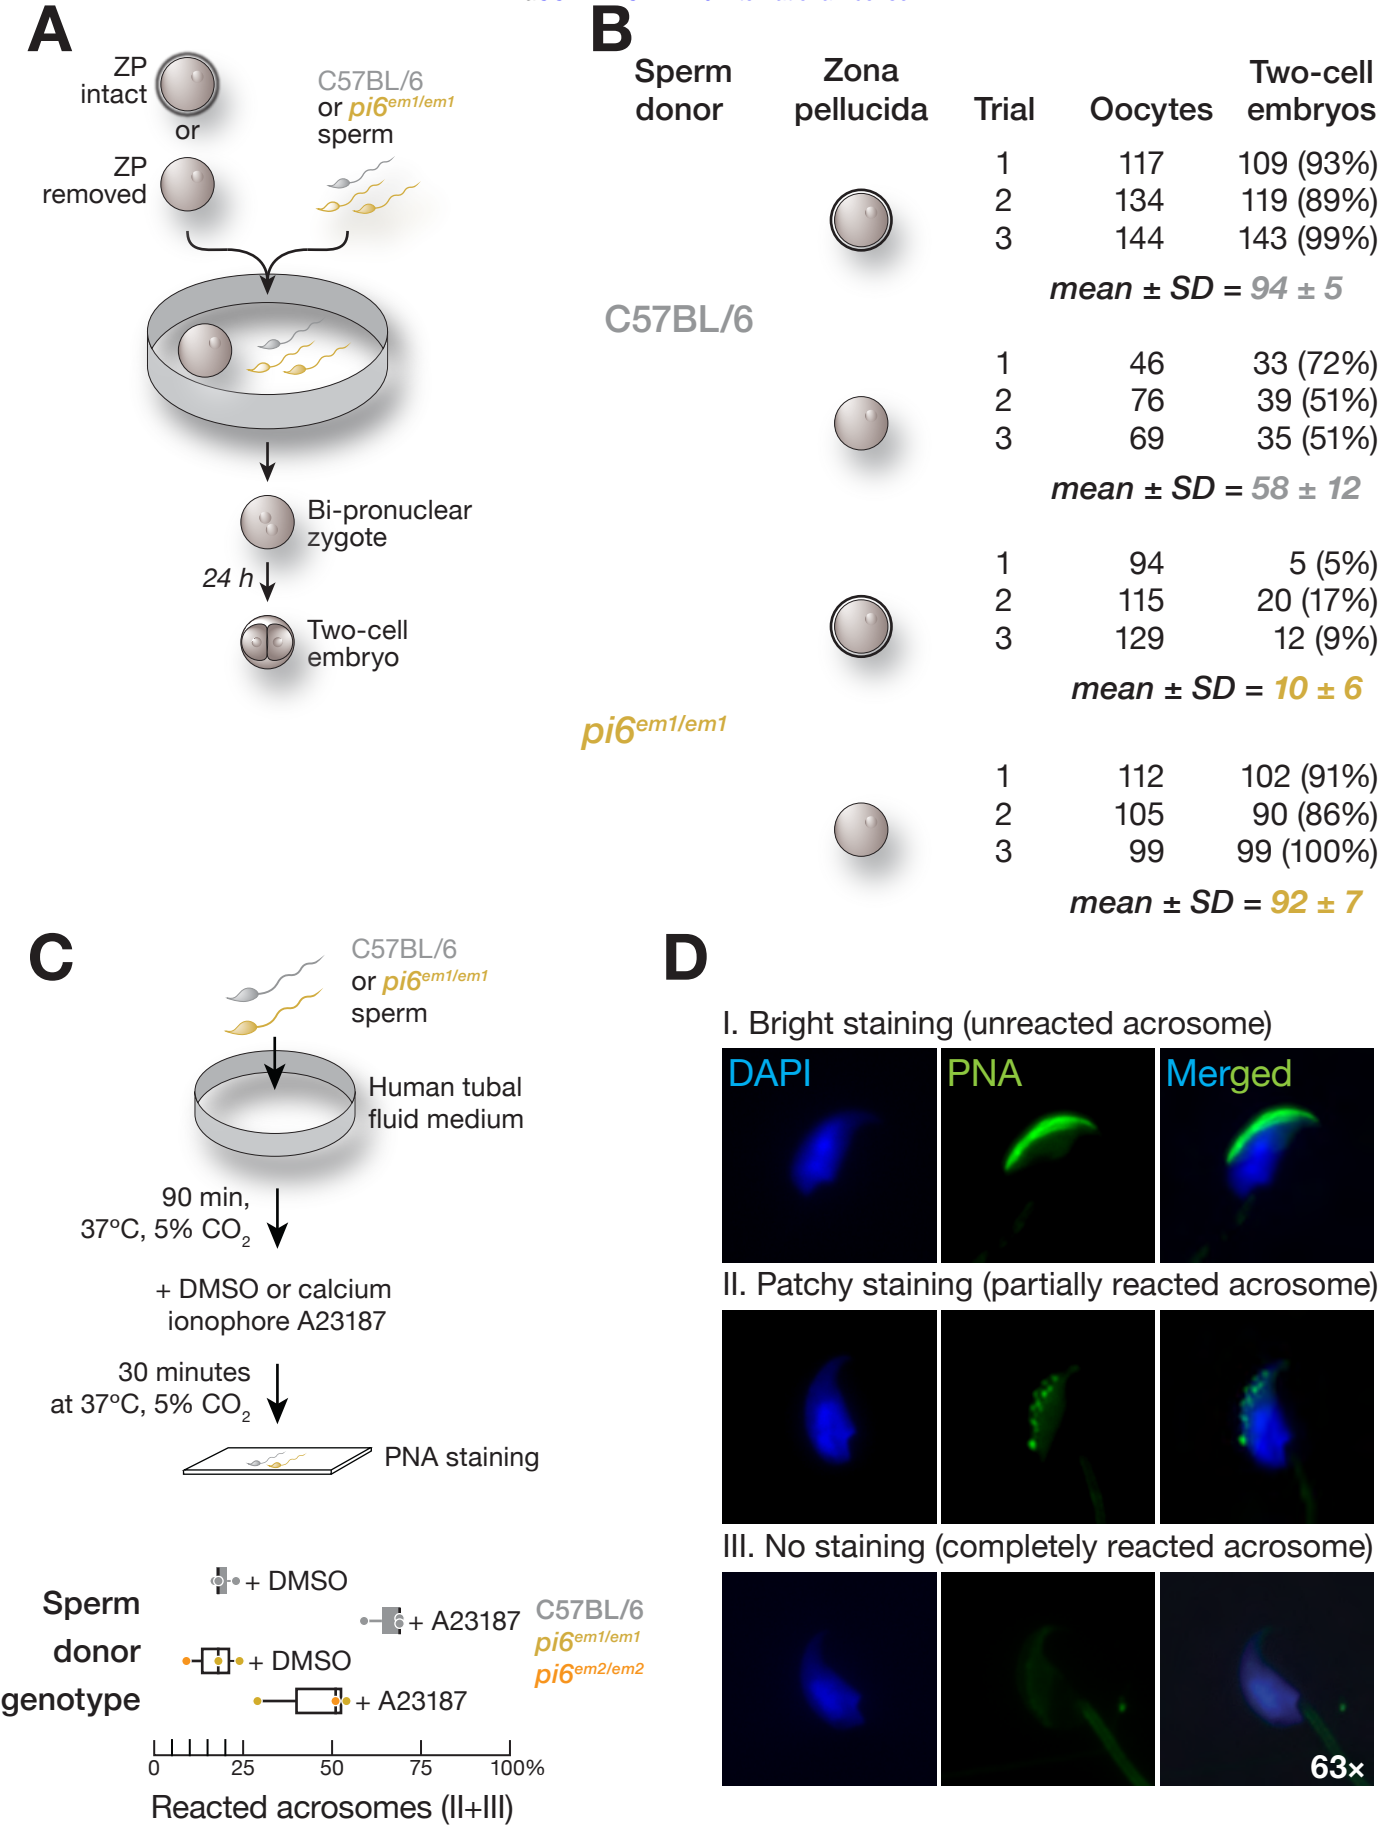

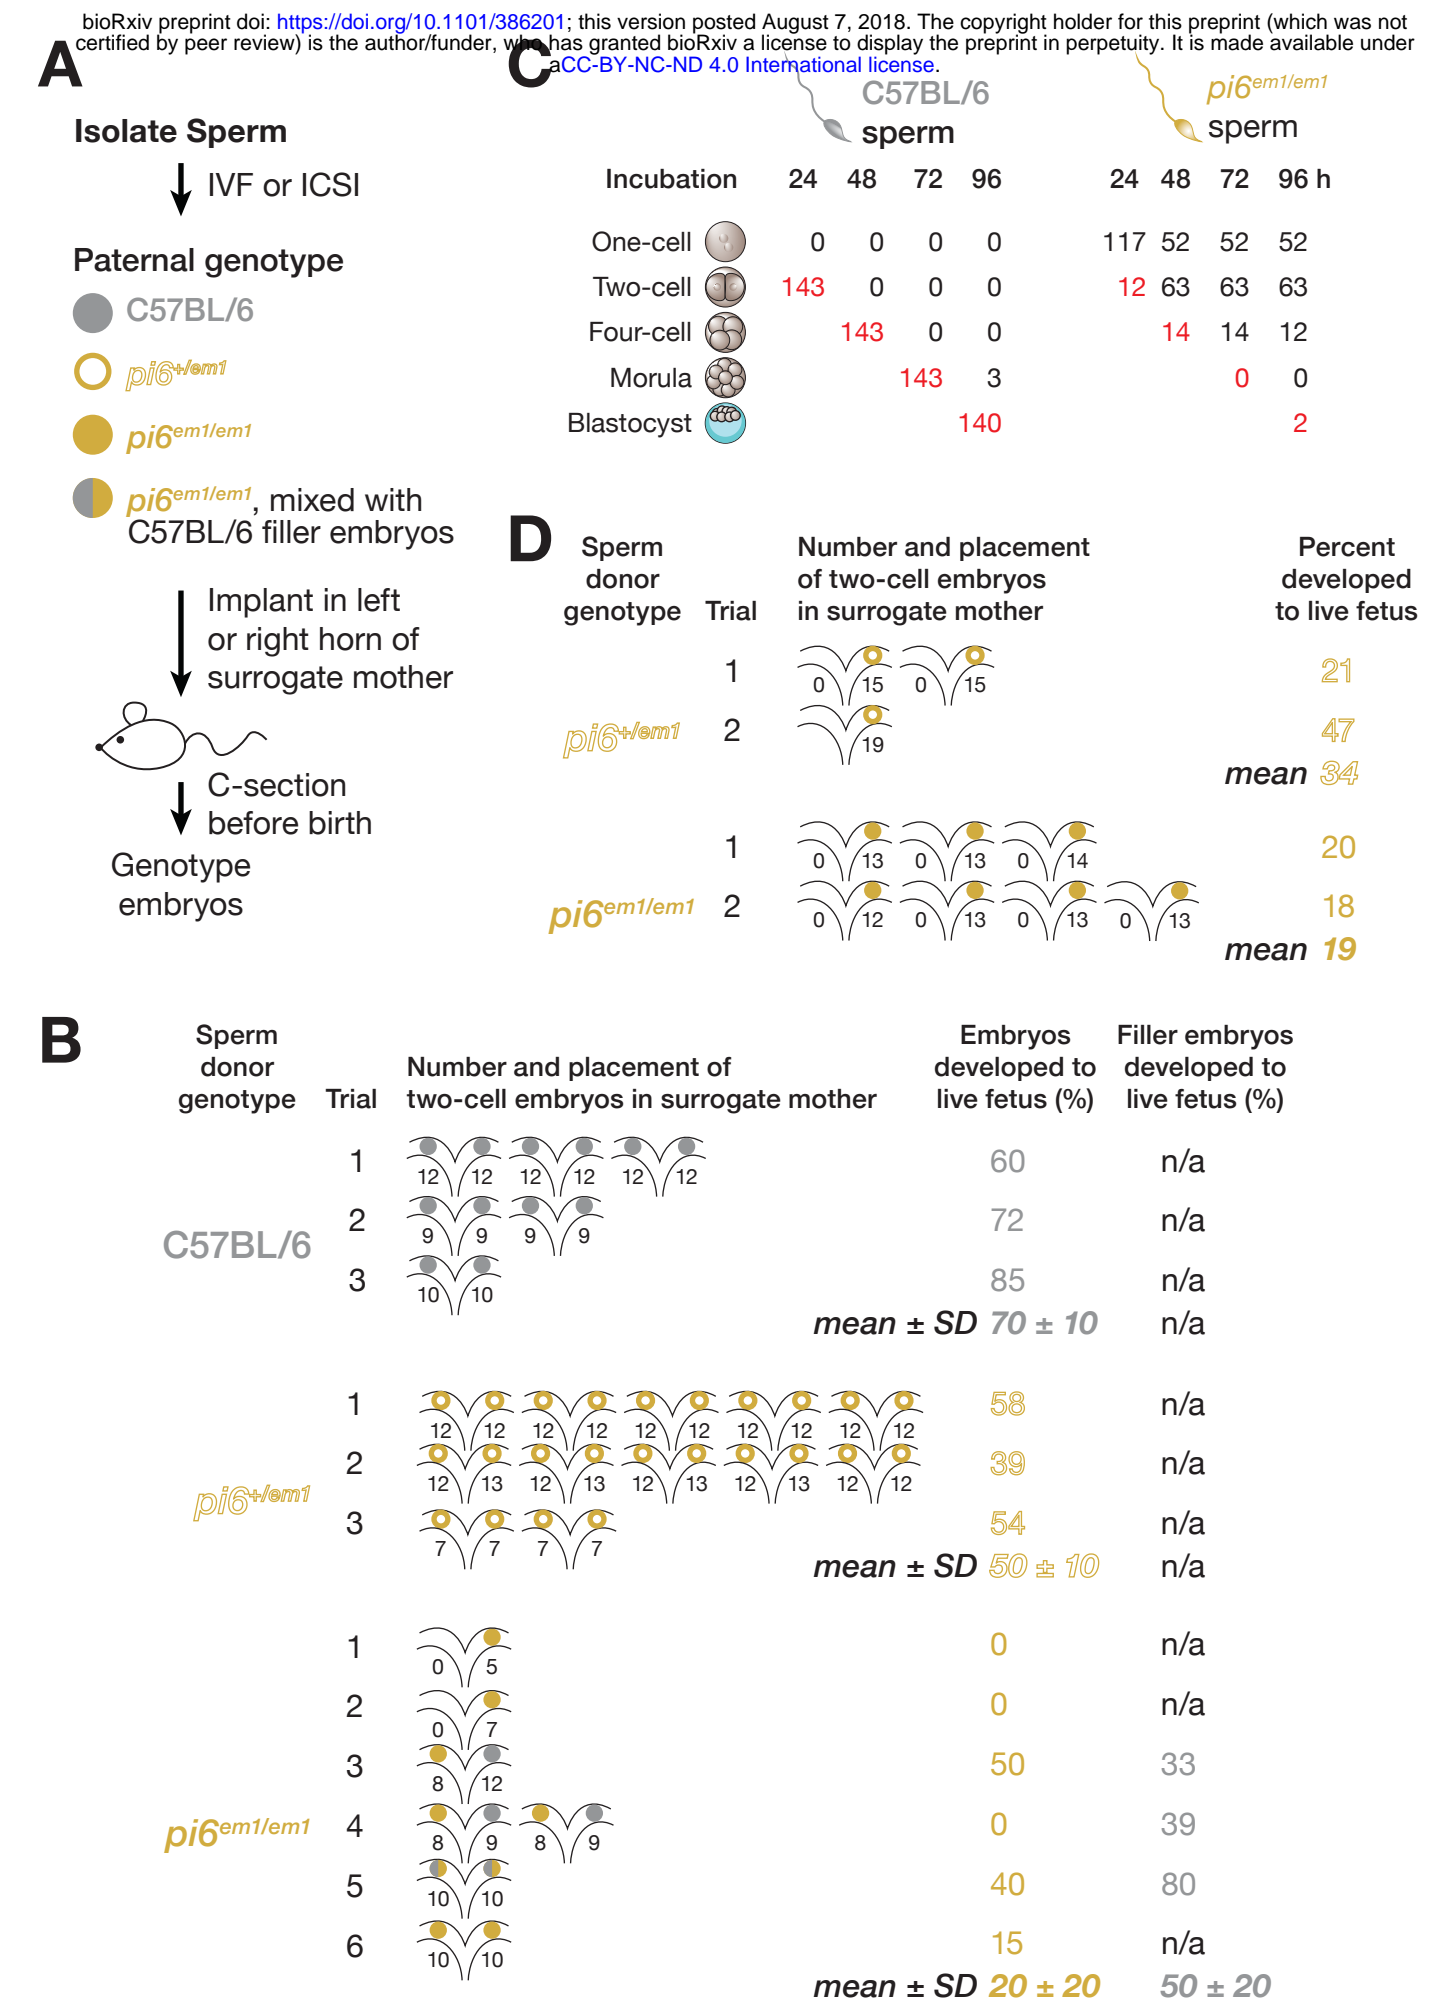

bioRxiv preprint doi: <https://doi.org/10.1101/386201>; this version posted August 7, 2018. The copyright holder for this preprint (which was not certified by peer review) is the author/funder, who has granted bioRxiv a license to display the preprint in perpetuity. It is made available under aCC-BY-NC-ND 4.0 International license.

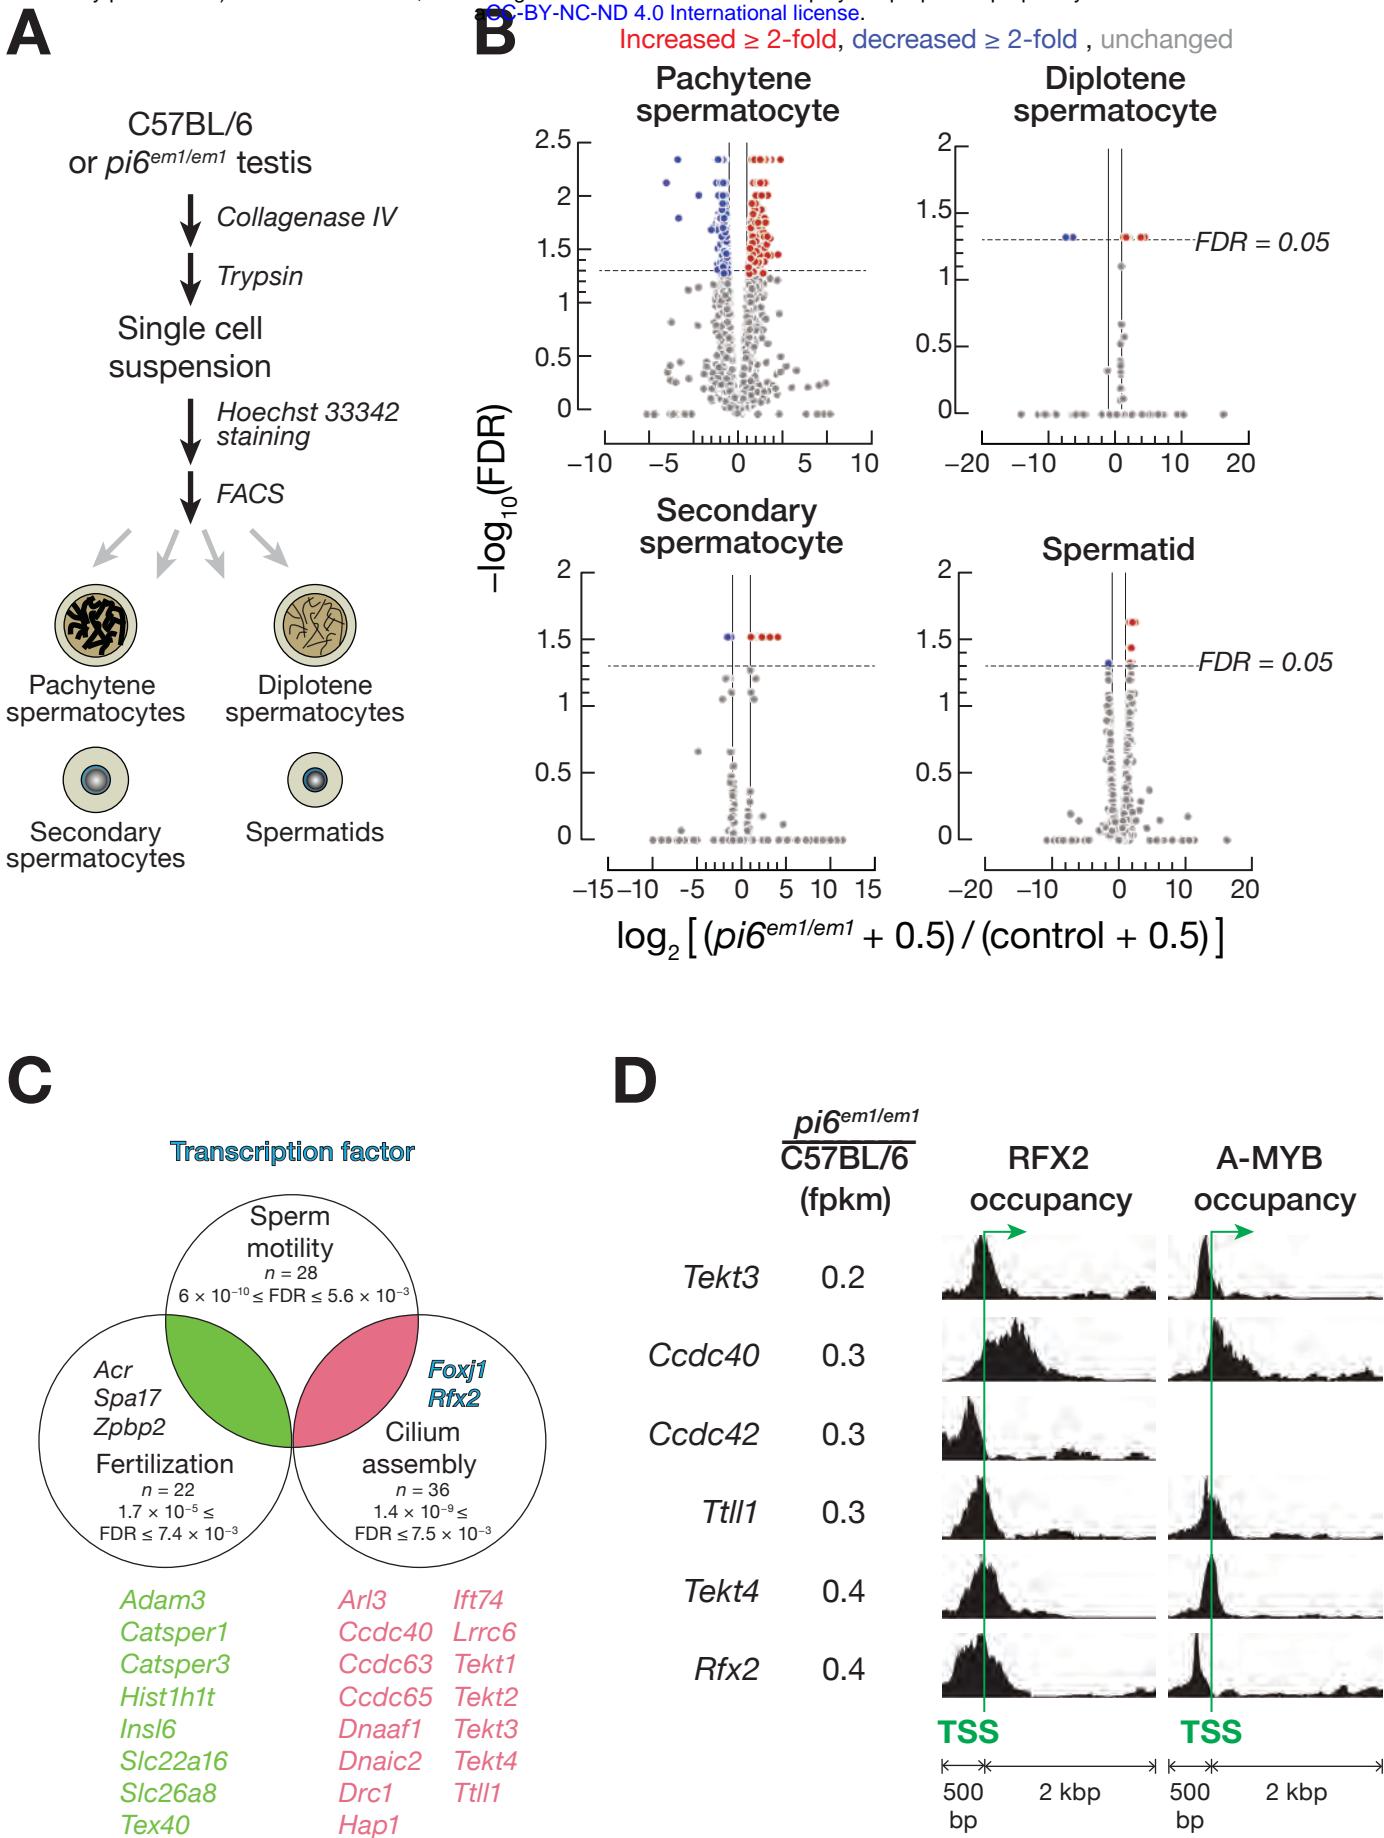

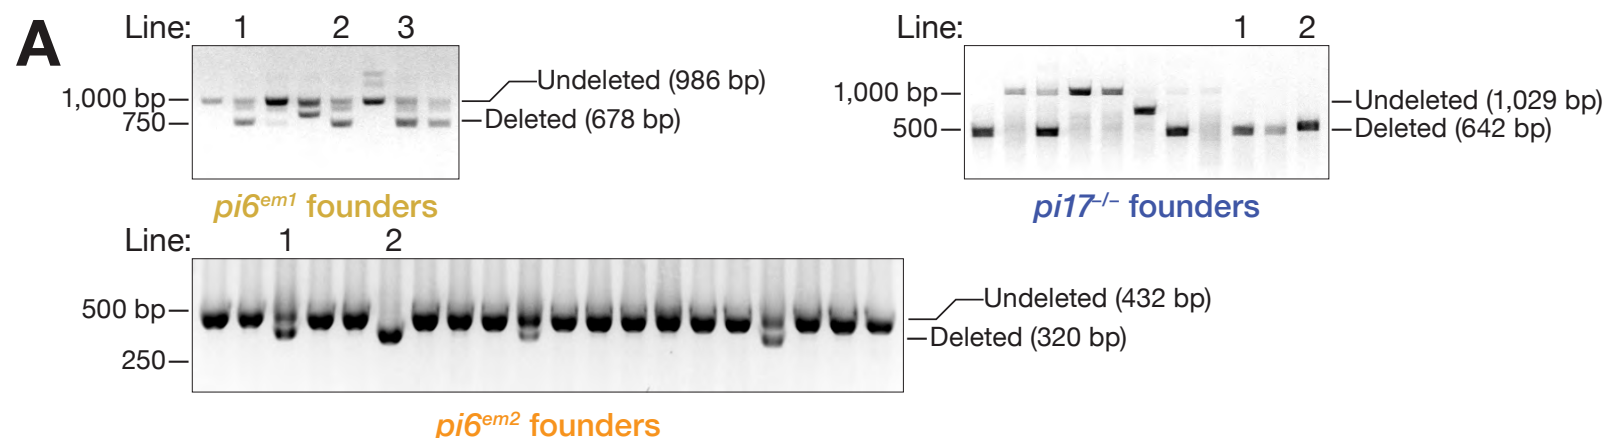

**B**

C57BL/6 AGAAGACTGCCTACTCCAAGATAGTGGG.....CACACAAGTGCCCAACGAAATGGAAAACA

sgRNA1 GACTGCCTACTCCAAGATAG sgRNA2 CACACAAGTGCCCAACGAAA

*pi6<sup>em1</sup>* 1 AGAAGACTGCCTACTCCAAG-----( $\Delta$ 219 bp)-----TGCCCAACGAAATGGAAAACA

*pi6<sup>em1</sup>* 2 AGAAGACTGCCTACTCCAAG-----( $\Delta$ 230 bp)-----ATGGAAAACA

*pi6<sup>em1</sup>* 3 AGAAGACTGCCTACTCCAA-----( $\Delta$ 228 bp)-----GAAATGGAAAACA

*pi6<sup>em1</sup>* 4 AGAAGACTGCCTACTCCAA-----( $\Delta$ 233 bp)-----GGAAAACA

*pi6<sup>em1</sup>* 5 AGAAGACTGCCTACTCCAAGA-----( $\Delta$ 227 bp)-----AAATGGAAAACA

*pi6<sup>em1</sup>* 6 AGAAGACTGCCTACTCCAA-----( $\Delta$ 231 bp)-----ATGGAAAACA

**C**

C57BL/6 ACGGTGGGTTCTATCCAATGAGGTC.....GGGATAGAGTAAGTGAGAAGCTGGCCCTTACATCAT

sgRNA1 ACGGTGGGTTCTATCCAATG sgRNA2 GATAGAGTAAGTGAGAAGC

*pi6<sup>em2</sup>* 1 ACGGTGGGTTCTATCCAA-----( $\Delta$ 116 bp)-----GCTGGCCCTTACATCAT

*pi6<sup>em2</sup>* 2 ACGGTGGG-----( $\Delta$ 125 bp)-----AGCTGGCCCTTACATCAT

**D**

C57BL/6 GGGCTGCTCTGTCTGACAACGGGAC...TCACATCTCTGTGCAG...TCCCTTCACACGGCCGTTTA...CCGTCCCTGATAGTGG

sgRNA2 GCTCTGTCTGACAACGGGAC sgRNA1 TCCCTTCACACGGCCGTTTA

*pi17<sup>-/-</sup>* 1 GGGCTGCT-----( $\Delta$ 606 bp)-----CCGTCCCTGATAGTGG

*pi17<sup>-/-</sup>* 2 GGGCTGCTCTGTCTGACAACG-----( $\Delta$ 583 bp)-----TTTA...CCGTCCCTGATAGTGG

*pi17<sup>-/-</sup>* 3 GGGCT-----( $\Delta$ 543 bp)-----TCTGTGCAG...TCCCTTCACACGGCCGTTTA...CCGTCCCTGATAGTGG

bioRxiv preprint doi: <https://doi.org/10.1101/386201>; this version posted August 7, 2018. The copyright holder for this preprint (which was not certified by peer review) is the author/funder, who has granted bioRxiv a license to display the preprint in perpetuity. It is made available under aCC-BY-NC-ND 4.0 International license.

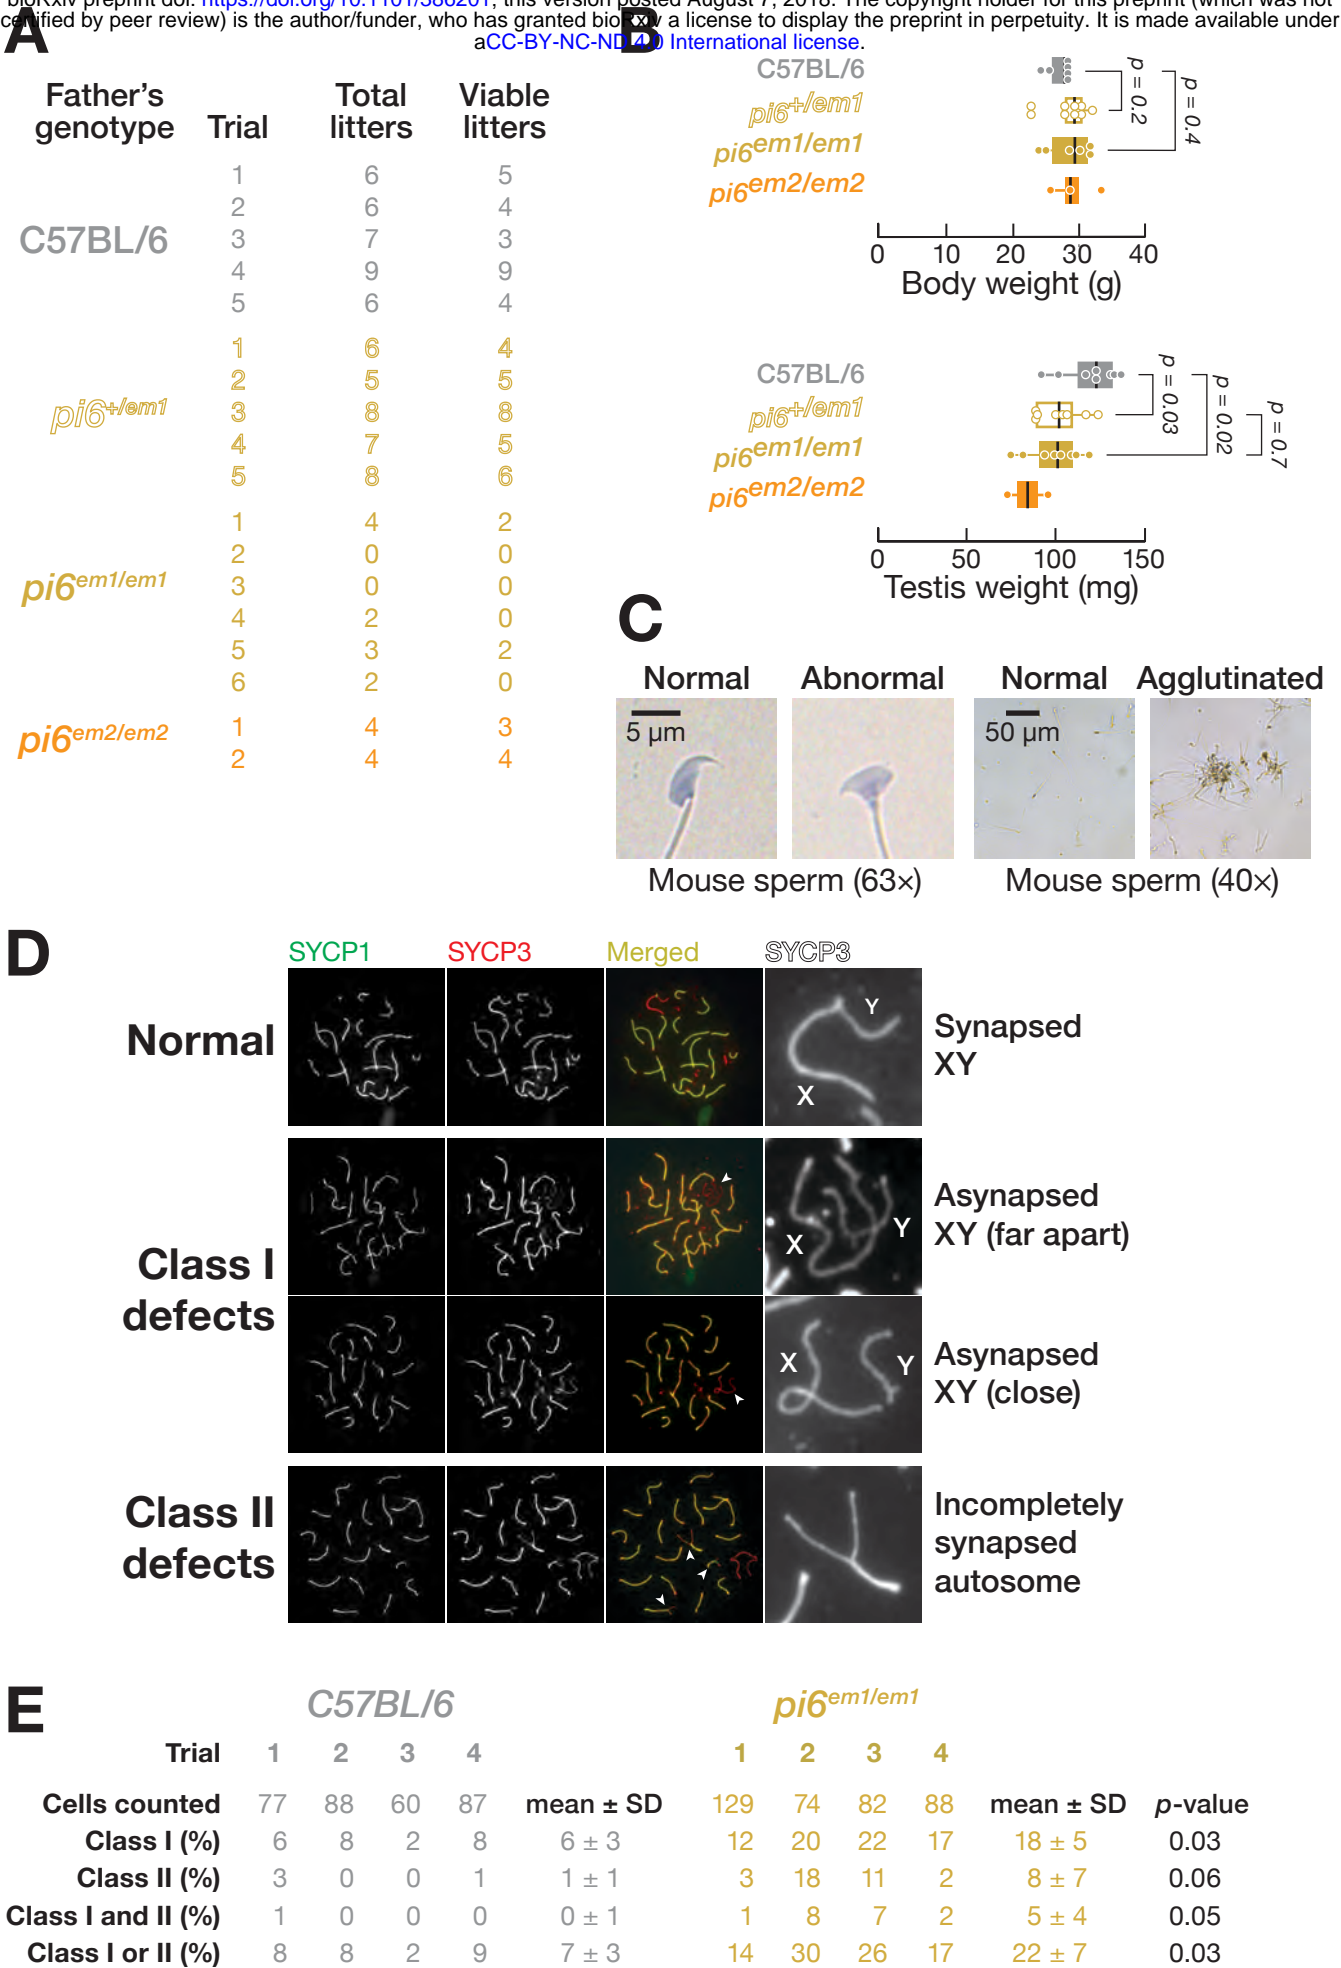

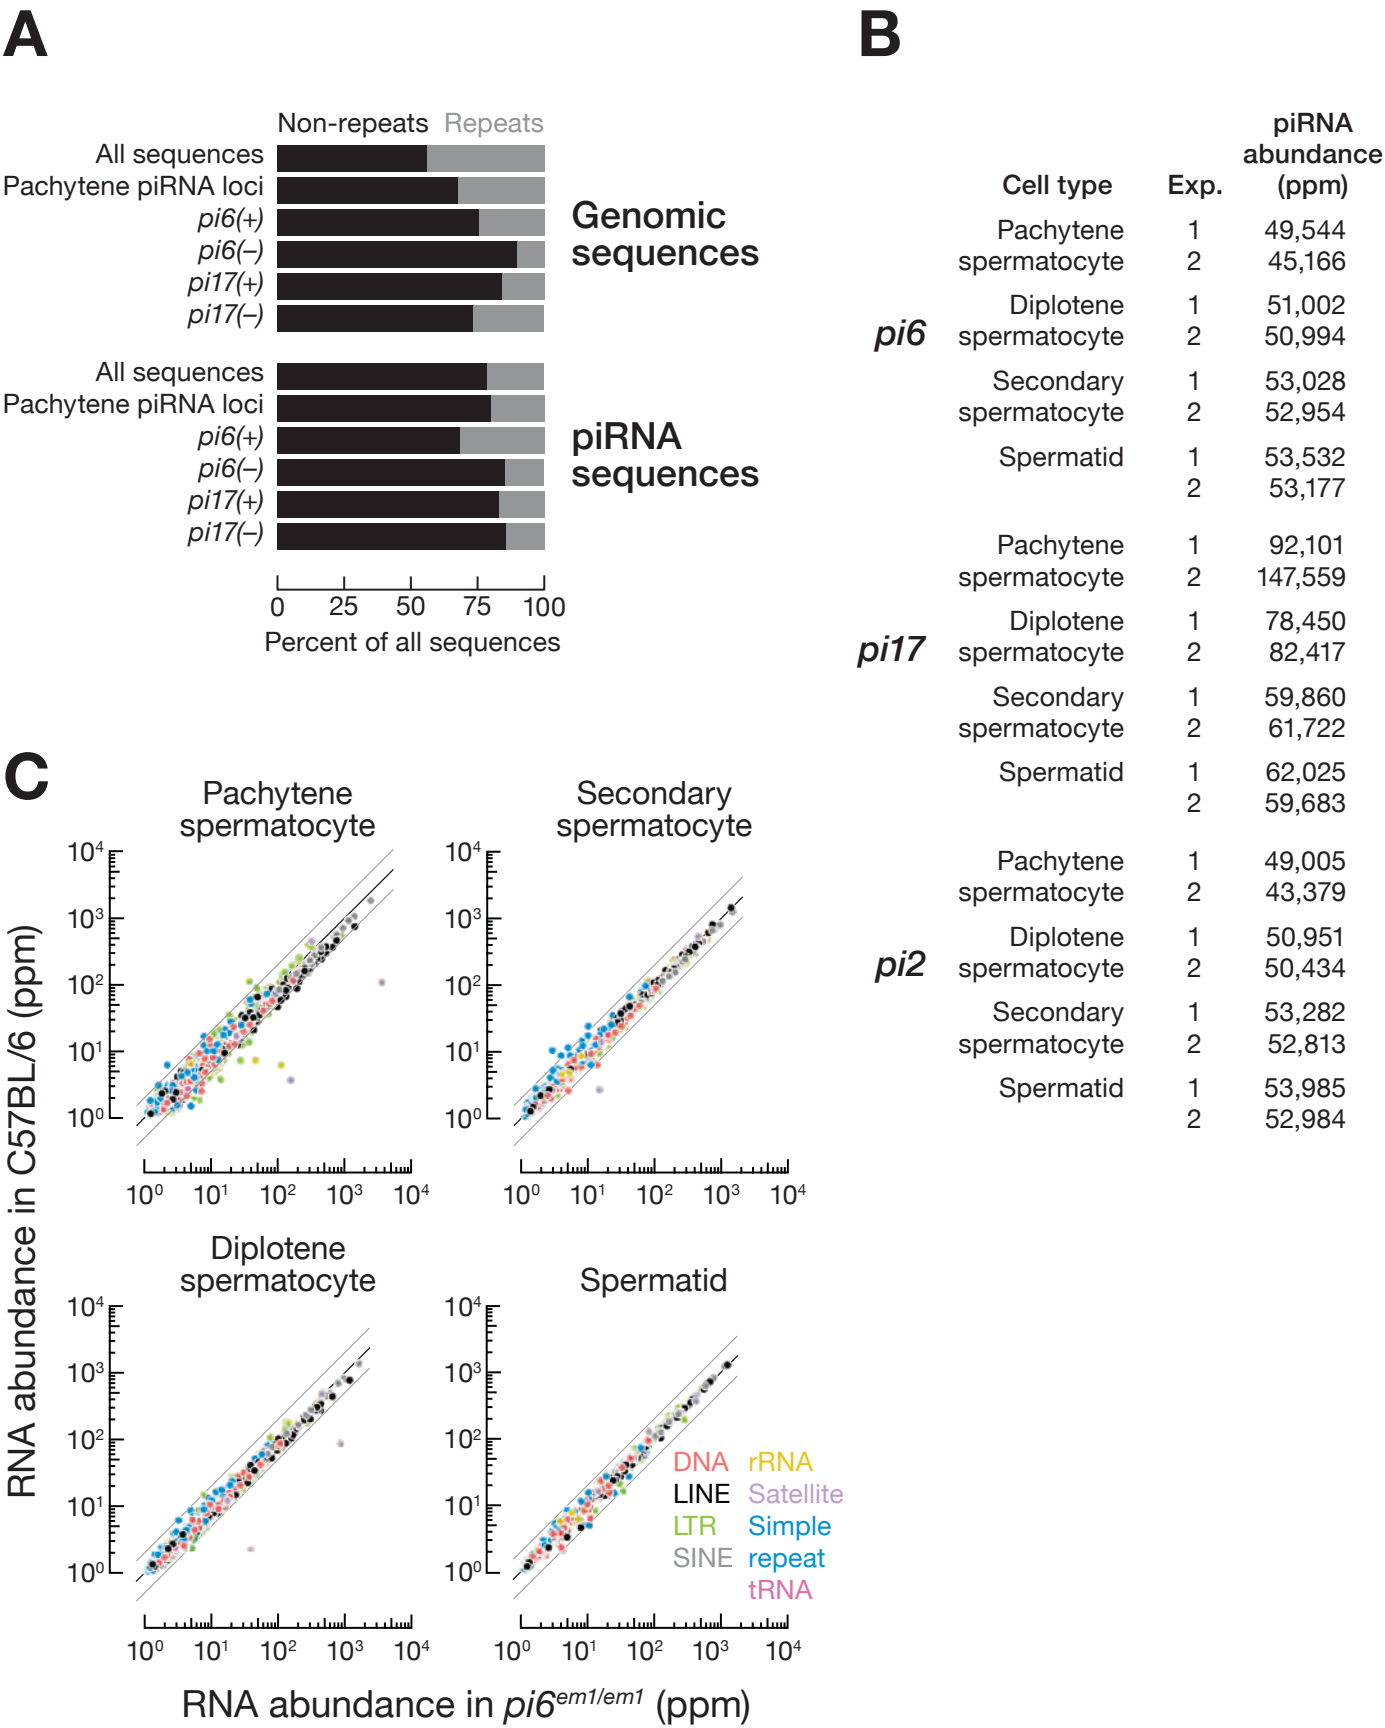

A

| Sperm donor genotype         | Trial | Number and placement of two-cell embryos in surrogate mother                        | Surrogate mothers | Pregnant surrogate mothers |
|------------------------------|-------|-------------------------------------------------------------------------------------|-------------------|----------------------------|
| C57BL/6                      | 1     |    | 3                 | 3                          |
|                              | 2     |    | 2                 | 2                          |
|                              | 3     |    | 1                 | 1                          |
|                              |       |                                                                                     |                   | 100%                       |
| <i>pi6<sup>+/-em1</sup></i>  | 1     |    | 2                 | 2                          |
|                              | 2     |   | 5                 | 5                          |
|                              | 3     |   | 5                 | 5                          |
|                              |       |                                                                                     |                   | 100%                       |
| <i>pi6<sup>em1/em1</sup></i> | 1     |   | 1                 | 0                          |
|                              | 2     |  | 1                 | 0                          |
|                              | 3     |  | 1                 | 1                          |
|                              | 4     |  | 2                 | 1                          |
|                              | 5     |  | 1                 | 1                          |
|                              | 6     |  | 1                 | 1                          |
|                              |       |                                                                                     |                   | 67%                        |

B

| Sperm donor genotype         | Trial | Number and placement of two-cell embryos in surrogate mother                        | Surrogate mothers | Pregnant surrogate mothers |
|------------------------------|-------|-------------------------------------------------------------------------------------|-------------------|----------------------------|
| <i>pi6<sup>+/-em1</sup></i>  | 1     |  | 2                 | 2                          |
|                              | 2     |  | 1                 | 1                          |
|                              |       |                                                                                     |                   | 100%                       |
| <i>pi6<sup>em1/em1</sup></i> | 1     |  | 3                 | 2                          |
|                              | 2     |  | 4                 | 2                          |
|                              |       |                                                                                     |                   | 57%                        |

**A**

| Cell type                         | Number of genes with altered RNA abundance |                           |
|-----------------------------------|--------------------------------------------|---------------------------|
|                                   | <i>pi6<sup>em1/em1</sup></i>               | <i>pi17<sup>-/-</sup></i> |
| Pachytene spermatocytes (4C)      | 875                                        | 0                         |
| Diplotene spermatocytes (4C)      | 9                                          | 277                       |
| Secondary spermatocytes (2C)      | 20                                         | 503                       |
| Spermatids (1C)                   | 45                                         | 0                         |
| <b>Total altered unique genes</b> | <b>928</b>                                 | <b>625</b>                |

**B**

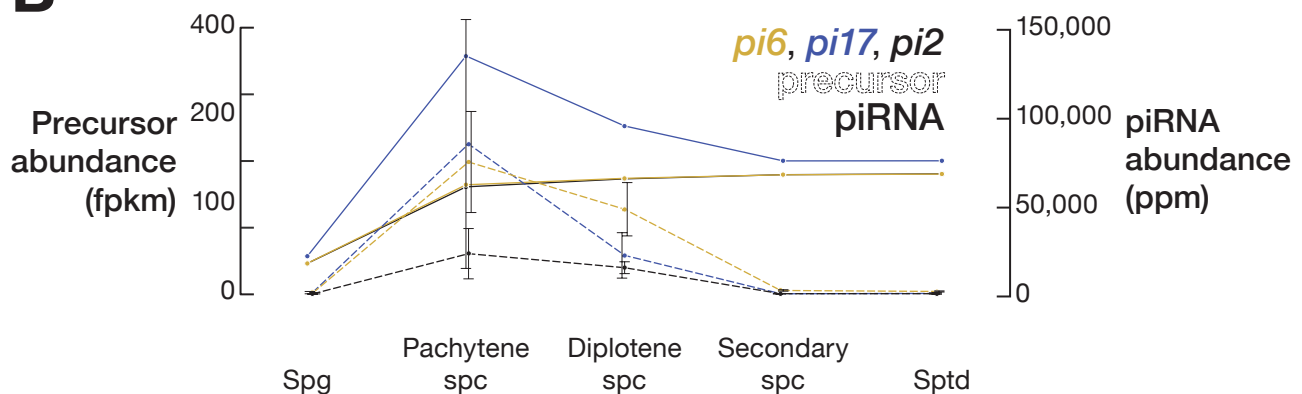

**C**

|                                 | Genes         | C57BL/6 (fpkm) | <i>pi6<sup>em1/em1</sup></i> (fpkm) | <i>pi6<sup>em1/em1</sup></i> / C57BL/6 | FDR                  |
|---------------------------------|---------------|----------------|-------------------------------------|----------------------------------------|----------------------|
| Meiotic chromosome organization | <i>Atm</i>    | 3.5            | 12.3                                | 3.2                                    | $2.2 \times 10^{-2}$ |
|                                 | <i>Dmc1</i>   | 1.6            | 9.2                                 | 4.6                                    | $2.6 \times 10^{-2}$ |
|                                 | <i>Syce1</i>  | 215.2          | 71.6                                | 0.3                                    | $4.3 \times 10^{-3}$ |
| miRNA pathway genes             | <i>Lin28a</i> | 0.9            | 7.6                                 | 5.6                                    | $1.6 \times 10^{-2}$ |
|                                 | <i>Zc3h7b</i> | 1.6            | 10.1                                | 5.0                                    | $4.3 \times 10^{-3}$ |
|                                 | <i>Ajuba</i>  | 0.6            | 5.4                                 | 5.3                                    | $7.0 \times 10^{-3}$ |

**Table S1. Statistics of CRISPR injection for *pi6* mutant generation.**

| Allele                       | <i>pi6<sup>em1</sup></i> |                 |                                     |         | <i>pi6<sup>em2</sup></i> |
|------------------------------|--------------------------|-----------------|-------------------------------------|---------|--------------------------|
| Nucleic acid injected        | sgRNA + Cas9 mRNA        | pX330 construct | sgRNA + Cas9 mRNA + pX330 construct | Total   | sgRNA + Cas9 mRNA        |
| Number of pups screened      | 55                       | 45              | 42                                  | 142     | 23                       |
| Number of founders           | 5 (9%)                   | 1 (2%)          | 2 (5%)                              | 8 (6%)  | 5 (22%)                  |
| Number of female founders    | 3 (60%)                  | 1 (100%)        | 1 (50%)                             | 5 (63%) | 2 (40%)                  |
| Number of male founders      | 2 (40%)                  | 0 (0%)          | 1 (50%)                             | 3 (38%) | 3 (60%)                  |
| Number of surviving founders | 5 (100%)                 | 0 (0%)          | 2 (100%)                            | 7 (88%) | 5 (100%)                 |

**Table S2. Differentially expressed genes in *pi6<sup>em1/em1</sup>* germ cells.**

| Cell type | Ensembl ID           | Gene            | Genomic Location (mm10)  | C57BL/6 (fpkm) | <i>pi6<sup>em1/em1</sup></i> (fpkm) | <i>pi6<sup>em1/em1</sup></i> C57BL/6 | FDR                  |
|-----------|----------------------|-----------------|--------------------------|----------------|-------------------------------------|--------------------------------------|----------------------|
| Pac spc   | ENSMUSG0000075014.1  | <i>Gm10800</i>  | chr2:98666546-98667301   | 132.8          | 3644.7                              | 27.3                                 | 4.3×10 <sup>-3</sup> |
| Pac spc   | ENSMUSG0000075015.3  | <i>Gm10801</i>  | chr2:98662236-98664083   | 12.7           | 299.3                               | 22.6                                 | 3.3×10 <sup>-2</sup> |
| Pac spc   | ENSMUSG0000021451.11 | <i>Sema4d</i>   | chr13:51701245-51793747  | 0.4            | 12.6                                | 14.1                                 | 4.3×10 <sup>-3</sup> |
| Pac spc   | ENSMUSG0000031584.12 | <i>Gsr</i>      | chr8:33652522-33698163   | 1.8            | 29.0                                | 13.0                                 | 4.3×10 <sup>-3</sup> |
| Pac spc   | ENSMUSG0000031229.12 | <i>Atrx</i>     | chrX:105797614-105929397 | 0.9            | 18.2                                | 13.0                                 | 4.3×10 <sup>-3</sup> |
| Pac spc   | ENSMUSG0000003949.12 | <i>Hlf</i>      | chr11:90336535-90390895  | 0.3            | 10.3                                | 12.8                                 | 3.3×10 <sup>-2</sup> |
| Pac spc   | ENSMUSG0000032841.11 | <i>Prr5l</i>    | chr2:101714284-101883256 | 0.3            | 9.1                                 | 12.8                                 | 2.0×10 <sup>-2</sup> |
| Pac spc   | ENSMUSG0000042105.14 | <i>Inpp5f</i>   | chr7:128611327-128696425 | 0.7            | 14.2                                | 12.2                                 | 2.3×10 <sup>-2</sup> |
| Pac spc   | ENSMUSG0000081327.1  | <i>Gm11819</i>  | chr4:13444769-13445141   | 0.0            | 5.4                                 | 11.9                                 | 4.3×10 <sup>-3</sup> |
| Pac spc   | ENSMUSG0000016386.11 | <i>Mpped2</i>   | chr2:106693268-106868356 | 0.4            | 9.4                                 | 11.0                                 | 1.8×10 <sup>-2</sup> |
| Pac spc   | ENSMUSG0000083546.1  | <i>Tpt1-ps1</i> | chr3:101233459-101233895 | 0.0            | 4.8                                 | 10.6                                 | 4.3×10 <sup>-3</sup> |
| Pac spc   | ENSMUSG0000031161.11 | <i>Hdac6</i>    | chrX:7930119-7947889     | 2.5            | 30.7                                | 10.4                                 | 4.3×10 <sup>-3</sup> |
| Pac spc   | ENSMUSG0000039428.6  | <i>Tmem135</i>  | chr7:89139722-89404222   | 4.1            | 46.9                                | 10.3                                 | 2.2×10 <sup>-2</sup> |
| Pac spc   | ENSMUSG0000038080.12 | <i>Kdm1b</i>    | chr13:47025169-47084613  | 0.6            | 10.6                                | 10.2                                 | 9.2×10 <sup>-3</sup> |
| Pac spc   | ENSMUSG0000008318.5  | <i>Relt</i>     | chr7:100845847-100863446 | 0.3            | 7.9                                 | 10.2                                 | 3.1×10 <sup>-2</sup> |
| Pac spc   | ENSMUSG0000005078.12 | <i>Jkamp</i>    | chr12:72085588-72185029  | 0.8            | 12.2                                | 9.9                                  | 3.3×10 <sup>-2</sup> |
| Pac spc   | ENSMUSG0000059625.6  | <i>Sohlh1</i>   | chr2:25842994-25847248   | 0.6            | 10.4                                | 9.9                                  | 2.2×10 <sup>-2</sup> |
| Pac spc   | ENSMUSG0000032135.10 | <i>Mcam</i>     | chr9:44123767-44142727   | 1.5            | 18.9                                | 9.9                                  | 4.3×10 <sup>-3</sup> |
| Pac spc   | ENSMUSG0000042453.10 | <i>Reln</i>     | chr5:21884453-22344702   | 1.6            | 19.4                                | 9.6                                  | 4.3×10 <sup>-3</sup> |
| Pac spc   | ENSMUSG0000016262.10 | <i>Sertad4</i>  | chr1:192844487-192856246 | 0.5            | 9.5                                 | 9.6                                  | 4.5×10 <sup>-2</sup> |
| Pac spc   | ENSMUSG0000039323.14 | <i>Igfbp2</i>   | chr1:72824502-72852474   | 1.3            | 16.9                                | 9.5                                  | 2.6×10 <sup>-2</sup> |
| Pac spc   | ENSMUSG0000028487.14 | <i>Bnc2</i>     | chr4:84275094-84675275   | 1.6            | 19.5                                | 9.5                                  | 4.3×10 <sup>-3</sup> |
| Pac spc   | ENSMUSG0000068270.11 | <i>Shroom4</i>  | chrX:6399853-6637448     | 0.3            | 6.5                                 | 9.2                                  | 4.9×10 <sup>-2</sup> |
| Pac spc   | ENSMUSG0000032598.8  | <i>Nckipsd</i>  | chr9:108808367-108818844 | 2.0            | 22.5                                | 9.2                                  | 4.3×10 <sup>-3</sup> |
| Pac spc   | ENSMUSG0000017760.11 | <i>Ctsa</i>     | chr2:164830731-164857711 | 0.6            | 9.9                                 | 9.1                                  | 4.3×10 <sup>-3</sup> |

|         |                      |                |                           |     |      |     |                      |
|---------|----------------------|----------------|---------------------------|-----|------|-----|----------------------|
| Pac spc | ENSMUSG0000019849.10 | <i>Prep</i>    | chr10:45067205-45158997   | 1.2 | 14.6 | 9.1 | 4.3×10 <sup>-3</sup> |
| Pac spc | ENSMUSG0000026923.11 | <i>Notch1</i>  | chr2:26445695-26516663    | 0.1 | 5.0  | 8.9 | 4.3×10 <sup>-3</sup> |
| Pac spc | ENSMUSG0000070371.7  | <i>Prss36</i>  | chr7:127932637-127946725  | 0.3 | 6.7  | 8.9 | 3.8×10 <sup>-2</sup> |
| Pac spc | ENSMUSG0000000247.7  | <i>Lhx2</i>    | chr2:38339280-38369733    | 0.1 | 5.3  | 8.9 | 4.3×10 <sup>-3</sup> |
| Pac spc | ENSMUSG0000027200.13 | <i>Sema6d</i>  | chr2:124089968-124667770  | 0.2 | 5.3  | 8.8 | 4.3×10 <sup>-3</sup> |
| Pac spc | ENSMUSG0000018417.10 | <i>Myo1b</i>   | chr1:51749764-51916071    | 0.9 | 12.1 | 8.8 | 7.0×10 <sup>-3</sup> |
| Pac spc | ENSMUSG0000050708.10 | <i>Ftl1</i>    | chr7:45457943-45459884    | 6.6 | 61.9 | 8.8 | 4.3×10 <sup>-3</sup> |
| Pac spc | ENSMUSG0000027547.13 | <i>Sall4</i>   | chr2:168748331-168768108  | 0.6 | 9.3  | 8.7 | 4.3×10 <sup>-3</sup> |
| Pac spc | ENSMUSG0000031431.9  | <i>Tsc22d3</i> | chrX:140539527-140600659  | 3.8 | 36.4 | 8.6 | 4.3×10 <sup>-3</sup> |
| Pac spc | ENSMUSG0000071369.6  | <i>Map3k5</i>  | chr10:19934471-20142753   | 1.0 | 12.2 | 8.5 | 1.7×10 <sup>-2</sup> |
| Pac spc | ENSMUSG0000030796.11 | <i>Tead2</i>   | chr7:45215752-45239115    | 0.5 | 8.0  | 8.4 | 4.3×10 <sup>-3</sup> |
| Pac spc | ENSMUSG0000022763.12 | <i>Aifm3</i>   | chr16:17489610-17507485   | 0.6 | 8.5  | 8.4 | 1.1×10 <sup>-2</sup> |
| Pac spc | ENSMUSG0000058454.10 | <i>Dhcr7</i>   | chr7:143823144-143848410  | 2.5 | 24.8 | 8.4 | 4.3×10 <sup>-3</sup> |
| Pac spc | ENSMUSG0000086481.1  | <i>Gm11707</i> | chr11:106972057-106973090 | 0.0 | 3.7  | 8.4 | 4.3×10 <sup>-3</sup> |
| Pac spc | ENSMUSG0000007891.11 | <i>Ctsd</i>    | chr7:142325836-142388038  | 3.7 | 34.1 | 8.3 | 4.3×10 <sup>-3</sup> |
| Pac spc | ENSMUSG0000025261.13 | <i>Huwe1</i>   | chrX:151800806-151935417  | 8.8 | 76.5 | 8.3 | 4.3×10 <sup>-3</sup> |
| Pac spc | ENSMUSG0000017386.6  | <i>Traf4</i>   | chr11:78158498-78165589   | 0.8 | 10.0 | 8.2 | 9.2×10 <sup>-3</sup> |
| Pac spc | ENSMUSG0000053398.7  | <i>Phgdh</i>   | chr3:98313169-98339990    | 0.7 | 9.3  | 8.2 | 1.8×10 <sup>-2</sup> |
| Pac spc | ENSMUSG0000005672.8  | <i>Kit</i>     | chr5:75574915-75656722    | 2.0 | 20.2 | 8.1 | 4.3×10 <sup>-3</sup> |
| Pac spc | ENSMUSG0000009376.11 | <i>Met</i>     | chr6:17463799-17573980    | 0.3 | 6.0  | 8.1 | 2.1×10 <sup>-2</sup> |
| Pac spc | ENSMUSG0000028293.10 | <i>Slc35a1</i> | chr4:34663256-34687438    | 0.9 | 11.2 | 8.1 | 1.5×10 <sup>-2</sup> |
| Pac spc | ENSMUSG0000061462.11 | <i>Obecn</i>   | chr11:58994255-59136402   | 0.5 | 7.8  | 8.0 | 1.9×10 <sup>-2</sup> |
| Pac spc | ENSMUSG0000031353.9  | <i>Rbbp7</i>   | chrX:162760401-162829454  | 2.5 | 23.6 | 8.0 | 2.8×10 <sup>-2</sup> |
| Pac spc | ENSMUSG0000039382.7  | <i>Wdr45</i>   | chrX:7714332-7728201      | 0.7 | 9.0  | 8.0 | 4.3×10 <sup>-3</sup> |
| Pac spc | ENSMUSG0000032291.8  | <i>Crabp1</i>  | chr9:54764747-54773110    | 2.9 | 26.6 | 7.9 | 7.0×10 <sup>-3</sup> |
| Pac spc | ENSMUSG0000027669.10 | <i>Gnb4</i>    | chr3:32580331-32616585    | 0.3 | 5.7  | 7.9 | 1.6×10 <sup>-2</sup> |
| Pac spc | ENSMUSG0000039683.12 | <i>Sdk1</i>    | chr5:141241489-142215586  | 1.7 | 16.5 | 7.9 | 1.5×10 <sup>-2</sup> |
| Pac spc | ENSMUSG0000025577.7  | <i>Cbx2</i>    | chr11:119022961-119031270 | 0.9 | 10.7 | 7.8 | 4.3×10 <sup>-3</sup> |
| Pac spc | ENSMUSG0000030199.12 | <i>Etv6</i>    | chr6:134035699-134270158  | 1.4 | 14.2 | 7.7 | 3.8×10 <sup>-2</sup> |

|         |                       |                 |                           |     |      |     |                      |
|---------|-----------------------|-----------------|---------------------------|-----|------|-----|----------------------|
| Pac spc | ENSMUSG0000022433.14  | <i>Csnk1e</i>   | chr15:79417855-79443919   | 0.6 | 8.1  | 7.6 | $7.0 \times 10^{-3}$ |
| Pac spc | ENSMUSG0000001525.10  | <i>Tubb5</i>    | chr17:35833920-35838306   | 2.2 | 19.8 | 7.6 | $4.3 \times 10^{-3}$ |
| Pac spc | ENSMUSG0000036893.12  | <i>Ehmt1</i>    | chr2:24790768-24919609    | 2.4 | 21.3 | 7.6 | $4.3 \times 10^{-3}$ |
| Pac spc | ENSMUSG00000031403.10 | <i>Dkc1</i>     | chrX:75095853-75131016    | 1.2 | 12.7 | 7.6 | $2.2 \times 10^{-2}$ |
| Pac spc | ENSMUSG0000006494.7   | <i>Pdk1</i>     | chr2:71873223-71903858    | 0.3 | 5.7  | 7.5 | $2.4 \times 10^{-2}$ |
| Pac spc | ENSMUSG0000029177.5   | <i>Cenpa</i>    | chr5:30666776-30674827    | 1.2 | 11.7 | 7.4 | $4.8 \times 10^{-2}$ |
| Pac spc | ENSMUSG0000035202.7   | <i>Lars2</i>    | chr9:123366939-123462664  | 2.7 | 22.9 | 7.3 | $4.3 \times 10^{-3}$ |
| Pac spc | ENSMUSG0000002227.11  | <i>Mov10</i>    | chr3:104794835-104818563  | 1.4 | 13.3 | 7.2 | $4.3 \times 10^{-3}$ |
| Pac spc | ENSMUSG0000042439.8   | <i>Zfp532</i>   | chr18:65580229-65689443   | 1.2 | 11.6 | 7.2 | $4.3 \times 10^{-3}$ |
| Pac spc | ENSMUSG0000001082.8   | <i>Mfsd10</i>   | chr5:34633641-34637212    | 1.1 | 10.7 | 7.2 | $4.3 \times 10^{-3}$ |
| Pac spc | ENSMUSG0000041417.11  | <i>Pik3r1</i>   | chr13:101680562-101768217 | 0.2 | 4.5  | 7.2 | $1.8 \times 10^{-2}$ |
| Pac spc | ENSMUSG0000025272.12  | <i>Tro</i>      | chrX:150645303-150657583  | 0.5 | 6.5  | 7.2 | $4.3 \times 10^{-3}$ |
| Pac spc | ENSMUSG0000004317.10  | <i>Clcn5</i>    | chrX:7153809-7319358      | 0.6 | 7.8  | 7.2 | $1.8 \times 10^{-2}$ |
| Pac spc | ENSMUSG0000012123.11  | <i>Aim1l</i>    | chr4:134065911-134095082  | 1.5 | 13.5 | 7.2 | $2.7 \times 10^{-2}$ |
| Pac spc | ENSMUSG0000024968.9   | <i>Rcor2</i>    | chr19:7267324-7275225     | 1.0 | 10.4 | 7.1 | $2.0 \times 10^{-2}$ |
| Pac spc | ENSMUSG0000036564.12  | <i>Ndrp4</i>    | chr8:95676979-95715119    | 1.6 | 14.5 | 7.1 | $4.3 \times 10^{-3}$ |
| Pac spc | ENSMUSG0000004328.11  | <i>Hif3a</i>    | chr7:17031506-17062427    | 0.1 | 3.6  | 7.1 | $3.0 \times 10^{-2}$ |
| Pac spc | ENSMUSG0000016239.7   | <i>Lonrf3</i>   | chrX:36328352-36362341    | 2.1 | 18.2 | 7.1 | $4.3 \times 10^{-3}$ |
| Pac spc | ENSMUSG0000002870.7   | <i>Mcm2</i>     | chr6:88883474-88898780    | 2.5 | 20.7 | 7.1 | $4.3 \times 10^{-3}$ |
| Pac spc | ENSMUSG0000040749.7   | <i>Siah1b</i>   | chrX:164070704-164076493  | 1.5 | 13.6 | 7.1 | $4.9 \times 10^{-2}$ |
| Pac spc | ENSMUSG0000026956.11  | <i>Uap1l1</i>   | chr2:25359888-25365682    | 0.4 | 6.1  | 7.1 | $2.3 \times 10^{-2}$ |
| Pac spc | ENSMUSG0000025815.9   | <i>Dhtkd1</i>   | chr2:5895509-5942792      | 0.5 | 6.2  | 7.0 | $4.4 \times 10^{-2}$ |
| Pac spc | ENSMUSG0000000787.8   | <i>Ddx3x</i>    | chrX:13280969-13294052    | 1.0 | 9.9  | 7.0 | $1.5 \times 10^{-2}$ |
| Pac spc | ENSMUSG0000030091.13  | <i>Nup210</i>   | chr6:91013067-91116829    | 1.7 | 14.7 | 7.0 | $4.3 \times 10^{-3}$ |
| Pac spc | ENSMUSG0000000325.11  | <i>Arvcf</i>    | chr16:18348181-18479073   | 1.1 | 10.8 | 7.0 | $4.3 \times 10^{-3}$ |
| Pac spc | ENSMUSG0000073294.4   | <i>AU022751</i> | chrX:6027055-6092269      | 0.3 | 5.3  | 7.0 | $3.7 \times 10^{-2}$ |
| Pac spc | ENSMUSG0000031103.8   | <i>Elf4</i>     | chrX:48411045-48463132    | 0.3 | 5.3  | 7.0 | $1.6 \times 10^{-2}$ |
| Pac spc | ENSMUSG0000024837.11  | <i>Dmrt1</i>    | chr19:25505617-25604329   | 3.8 | 29.4 | 7.0 | $4.3 \times 10^{-3}$ |
| Pac spc | ENSMUSG0000000037.12  | <i>Scml2</i>    | chrX:161117192-161258213  | 3.2 | 24.6 | 6.8 | $7.0 \times 10^{-3}$ |

|         |                           |                           |                               |     |      |     |                      |
|---------|---------------------------|---------------------------|-------------------------------|-----|------|-----|----------------------|
| Pac spc | ENSMUSG00<br>000009670.7  | <i>Tex11</i>              | chrX:10083864<br>7-101059667  | 1.5 | 12.9 | 6.8 | $1.3 \times 10^{-2}$ |
| Pac spc | ENSMUSG00<br>000056004.12 | <i>9330182L<br/>06Rik</i> | chr5:9266117-<br>9481825      | 0.1 | 3.8  | 6.8 | $4.3 \times 10^{-3}$ |
| Pac spc | ENSMUSG00<br>000034168.6  | <i>Irf2bpl</i>            | chr12:86880702<br>-86884814   | 0.6 | 6.6  | 6.8 | $4.3 \times 10^{-3}$ |
| Pac spc | ENSMUSG00<br>000000420.11 | <i>Galnt1</i>             | chr18:24205343<br>-24286818   | 1.9 | 15.5 | 6.7 | $4.3 \times 10^{-3}$ |
| Pac spc | ENSMUSG00<br>000034673.10 | <i>Pbx2</i>               | chr17:34589805<br>-34597400   | 2.1 | 16.8 | 6.7 | $1.8 \times 10^{-2}$ |
| Pac spc | ENSMUSG00<br>000034926.3  | <i>Dhcr24</i>             | chr4:106561037<br>-106589113  | 1.4 | 11.8 | 6.6 | $4.3 \times 10^{-3}$ |
| Pac spc | ENSMUSG00<br>000045374.14 | <i>Wdr81</i>              | chr11:75440943<br>-75454717   | 0.6 | 7.0  | 6.6 | $4.3 \times 10^{-3}$ |
| Pac spc | ENSMUSG00<br>000043993.6  | <i>2900052L<br/>18Rik</i> | chr11:12022980<br>1-120231585 | 0.3 | 5.0  | 6.6 | $3.9 \times 10^{-2}$ |
| Pac spc | ENSMUSG00<br>000037138.12 | <i>Aff3</i>               | chr1:38177325-<br>38664955    | 0.4 | 5.8  | 6.6 | $3.2 \times 10^{-2}$ |
| Pac spc | ENSMUSG00<br>000030123.11 | <i>Plxnd1</i>             | chr6:115954810<br>-115995005  | 0.8 | 8.4  | 6.6 | $4.3 \times 10^{-3}$ |
| Pac spc | ENSMUSG00<br>000038764.10 | <i>Ptpn3</i>              | chr4:57190840-<br>57307305    | 0.2 | 4.1  | 6.6 | $1.7 \times 10^{-2}$ |
| Pac spc | ENSMUSG00<br>000006378.9  | <i>Gcat</i>               | chr15:79030873<br>-79043558   | 0.8 | 8.0  | 6.5 | $1.8 \times 10^{-2}$ |
| Pac spc | ENSMUSG00<br>000039316.10 | <i>Rftn1</i>              | chr17:49992256<br>-50190674   | 0.8 | 8.2  | 6.5 | $4.9 \times 10^{-2}$ |
| Pac spc | ENSMUSG00<br>000020387.11 | <i>Jade2</i>              | chr11:51813454<br>-51857653   | 0.6 | 6.4  | 6.5 | $4.3 \times 10^{-3}$ |
| Pac spc | ENSMUSG00<br>000051817.8  | <i>Sox12</i>              | chr2:152393610<br>-152398063  | 0.6 | 6.3  | 6.5 | $7.0 \times 10^{-3}$ |
| Pac spc | ENSMUSG00<br>000069053.7  | <i>Uba1y</i>              | chrY:818648-<br>847750        | 2.0 | 15.3 | 6.4 | $4.3 \times 10^{-3}$ |
| Pac spc | ENSMUSG00<br>000030530.11 | <i>Furin</i>              | chr7:80388584-<br>80405436    | 1.0 | 9.3  | 6.4 | $9.2 \times 10^{-3}$ |
| Pac spc | ENSMUSG00<br>000019822.8  | <i>Smpd2</i>              | chr10:41476313<br>-41490369   | 1.6 | 13.1 | 6.4 | $1.7 \times 10^{-2}$ |
| Pac spc | ENSMUSG00<br>000026944.14 | <i>Abca2</i>              | chr2:25428702-<br>25448540    | 2.4 | 18.3 | 6.4 | $4.3 \times 10^{-3}$ |
| Pac spc | ENSMUSG00<br>000028980.10 | <i>H6pd</i>               | chr4:149979474<br>-150009023  | 0.2 | 3.7  | 6.4 | $3.1 \times 10^{-2}$ |
| Pac spc | ENSMUSG00<br>000042506.11 | <i>Usp22</i>              | chr11:61151784<br>-61175055   | 1.9 | 15.0 | 6.3 | $9.2 \times 10^{-3}$ |
| Pac spc | ENSMUSG00<br>000039741.11 | <i>Bahcc1</i>             | chr11:12023294<br>6-120292296 | 1.1 | 9.4  | 6.3 | $4.3 \times 10^{-3}$ |
| Pac spc | ENSMUSG00<br>000015291.6  | <i>Gdi1</i>               | chrX:74304997-<br>74311862    | 0.7 | 7.3  | 6.3 | $1.7 \times 10^{-2}$ |
| Pac spc | ENSMUSG00<br>000006369.10 | <i>Fbln1</i>              | chr15:85205948<br>-85286535   | 1.0 | 8.9  | 6.3 | $2.0 \times 10^{-2}$ |
| Pac spc | ENSMUSG00<br>000046774.12 | <i>8030474K<br/>03Rik</i> | chrX:10179465<br>5-101798642  | 1.2 | 10.1 | 6.2 | $1.7 \times 10^{-2}$ |
| Pac spc | ENSMUSG00<br>000025764.10 | <i>Jade1</i>              | chr3:41555730-<br>41616864    | 2.0 | 15.0 | 6.2 | $4.3 \times 10^{-3}$ |
| Pac spc | ENSMUSG00<br>000044349.11 | <i>Snhg11</i>             | chr2:158375637<br>-158386145  | 0.2 | 4.1  | 6.2 | $1.7 \times 10^{-2}$ |
| Pac spc | ENSMUSG00<br>000074480.4  | <i>Mex3a</i>              | chr3:88532394-<br>88541396    | 0.5 | 5.7  | 6.2 | $4.3 \times 10^{-3}$ |
| Pac spc | ENSMUSG00<br>000034714.9  | <i>Ttyh2</i>              | chr11:11467543<br>0-114720977 | 0.7 | 7.0  | 6.2 | $9.2 \times 10^{-3}$ |

|         |                           |                |                               |      |      |     |                      |
|---------|---------------------------|----------------|-------------------------------|------|------|-----|----------------------|
| Pac spc | ENSMUSG00<br>000022216.12 | <i>Psme1</i>   | chr14:55578122<br>-55585302   | 1.8  | 13.7 | 6.2 | $4.0 \times 10^{-2}$ |
| Pac spc | ENSMUSG00<br>000026074.10 | <i>Map4k4</i>  | chr1:39900912-<br>40026310    | 1.9  | 14.4 | 6.2 | $1.3 \times 10^{-2}$ |
| Pac spc | ENSMUSG00<br>000021466.7  | <i>Ptch1</i>   | chr13:63508327<br>-63573598   | 0.2  | 3.6  | 6.1 | $2.3 \times 10^{-2}$ |
| Pac spc | ENSMUSG00<br>000013033.12 | <i>Lphn1</i>   | chr8:83900104-<br>83955205    | 2.4  | 17.1 | 6.1 | $4.1 \times 10^{-2}$ |
| Pac spc | ENSMUSG00<br>000032312.6  | <i>Csk</i>     | chr9:57626646-<br>57645653    | 0.7  | 7.0  | 6.1 | $1.6 \times 10^{-2}$ |
| Pac spc | ENSMUSG00<br>000099502.1  | <i>Gm28640</i> | chr2:74130180-<br>74130730    | 0.0  | 2.5  | 6.1 | $4.9 \times 10^{-2}$ |
| Pac spc | ENSMUSG00<br>000025558.11 | <i>Dock9</i>   | chr14:12154203<br>8-121797734 | 1.1  | 9.5  | 6.1 | $4.3 \times 10^{-3}$ |
| Pac spc | ENSMUSG00<br>000023262.8  | <i>Acy1</i>    | chr9:106432980<br>-106438319  | 0.4  | 5.0  | 6.0 | $3.0 \times 10^{-2}$ |
| Pac spc | ENSMUSG00<br>000082670.1  | <i>Gm14050</i> | chr2:122207919<br>-122208265  | 0.0  | 2.5  | 6.0 | $1.7 \times 10^{-2}$ |
| Pac spc | ENSMUSG00<br>000055780.6  | <i>Usp26</i>   | chrX:51753958-<br>51801233    | 1.6  | 12.3 | 6.0 | $4.3 \times 10^{-3}$ |
| Pac spc | ENSMUSG00<br>000034690.8  | <i>Nlrp4c</i>  | chr7:6045160-<br>6105149      | 0.8  | 7.3  | 6.0 | $1.3 \times 10^{-2}$ |
| Pac spc | ENSMUSG00<br>000019087.9  | <i>Atp6ap1</i> | chrX:74297096-<br>74304721    | 1.6  | 11.7 | 5.9 | $7.0 \times 10^{-3}$ |
| Pac spc | ENSMUSG00<br>000047945.6  | <i>Marcks1</i> | chr4:129513580<br>-129515985  | 7.6  | 47.5 | 5.9 | $4.3 \times 10^{-3}$ |
| Pac spc | ENSMUSG00<br>000020806.11 | <i>Rhbd2</i>   | chr11:11659816<br>4-116627019 | 0.7  | 6.6  | 5.9 | $1.8 \times 10^{-2}$ |
| Pac spc | ENSMUSG00<br>000032812.12 | <i>Arap1</i>   | chr7:101348066<br>-101412586  | 0.5  | 5.1  | 5.9 | $4.3 \times 10^{-3}$ |
| Pac spc | ENSMUSG00<br>000020661.11 | <i>Dnmt3a</i>  | chr12:3806006-<br>3914443     | 1.6  | 11.6 | 5.9 | $4.3 \times 10^{-3}$ |
| Pac spc | ENSMUSG00<br>000046574.7  | <i>Prr12</i>   | chr7:45027706-<br>45052881    | 0.9  | 7.5  | 5.8 | $4.3 \times 10^{-3}$ |
| Pac spc | ENSMUSG00<br>000005533.9  | <i>Igf1r</i>   | chr7:67952858-<br>68226780    | 2.5  | 16.7 | 5.8 | $4.3 \times 10^{-3}$ |
| Pac spc | ENSMUSG00<br>000042410.11 | <i>Agps</i>    | chr2:75832176-<br>75931350    | 1.7  | 12.2 | 5.8 | $4.3 \times 10^{-3}$ |
| Pac spc | ENSMUSG00<br>000072944.7  | <i>Nup62cl</i> | chrX:14000680<br>4-140062712  | 0.8  | 7.3  | 5.8 | $3.4 \times 10^{-2}$ |
| Pac spc | ENSMUSG00<br>000004221.12 | <i>Ikkg</i>    | chrX:74393289-<br>74453854    | 0.2  | 3.7  | 5.8 | $7.0 \times 10^{-3}$ |
| Pac spc | ENSMUSG00<br>000033792.8  | <i>Atp7a</i>   | chrX:10602727<br>5-106124926  | 0.4  | 4.5  | 5.8 | $3.1 \times 10^{-2}$ |
| Pac spc | ENSMUSG00<br>000071773.4  | <i>Rhox1</i>   | chrX:37213803-<br>37222258    | 0.0  | 2.4  | 5.8 | $4.3 \times 10^{-3}$ |
| Pac spc | ENSMUSG00<br>000027359.12 | <i>Slc27a2</i> | chr2:126521201<br>-126588243  | 0.3  | 4.0  | 5.7 | $2.5 \times 10^{-2}$ |
| Pac spc | ENSMUSG00<br>000025503.4  | <i>Taldo1</i>  | chr7:141392198<br>-141402968  | 2.6  | 17.1 | 5.7 | $1.6 \times 10^{-2}$ |
| Pac spc | ENSMUSG00<br>000019055.11 | <i>Plod1</i>   | chr4:147909752<br>-147936767  | 1.8  | 12.4 | 5.7 | $4.3 \times 10^{-3}$ |
| Pac spc | ENSMUSG00<br>000029223.9  | <i>Uchl1</i>   | chr5:66626494-<br>66687231    | 16.5 | 96.1 | 5.7 | $4.3 \times 10^{-3}$ |
| Pac spc | ENSMUSG00<br>000028782.10 | <i>Bai2</i>    | chr4:129984869<br>-130022633  | 0.4  | 4.8  | 5.7 | $4.3 \times 10^{-3}$ |
| Pac spc | ENSMUSG00<br>000055612.11 | <i>Cdca7</i>   | chr2:72476158-<br>72486893    | 1.8  | 12.7 | 5.7 | $7.0 \times 10^{-3}$ |

|         |                           |                           |                              |     |      |     |                      |
|---------|---------------------------|---------------------------|------------------------------|-----|------|-----|----------------------|
| Pac spc | ENSMUSG00<br>000050966.5  | <i>Lin28a</i>             | chr4:134003329<br>-134019869 | 0.9 | 7.6  | 5.6 | $1.6 \times 10^{-2}$ |
| Pac spc | ENSMUSG00<br>000031157.6  | <i>Pqbp1</i>              | chrX:7894518-<br>7899269     | 0.4 | 4.7  | 5.6 | $2.2 \times 10^{-2}$ |
| Pac spc | ENSMUSG00<br>000079487.7  | <i>Med12</i>              | chrX:10127402<br>9-101325963 | 3.0 | 18.9 | 5.6 | $4.3 \times 10^{-3}$ |
| Pac spc | ENSMUSG00<br>000028434.8  | <i>Epb4.1l4b</i>          | chr4:56991971-<br>57143437   | 0.8 | 6.8  | 5.6 | $2.1 \times 10^{-2}$ |
| Pac spc | ENSMUSG00<br>000037344.9  | <i>Slc12a9</i>            | chr5:137314557<br>-137333597 | 1.2 | 8.8  | 5.6 | $1.3 \times 10^{-2}$ |
| Pac spc | ENSMUSG00<br>000028078.10 | <i>Dclk2</i>              | chr3:86786150-<br>86920852   | 0.3 | 4.1  | 5.6 | $1.7 \times 10^{-2}$ |
| Pac spc | ENSMUSG00<br>000016534.11 | <i>Lamp2</i>              | chrX:38401356-<br>38456454   | 2.2 | 14.3 | 5.6 | $4.2 \times 10^{-2}$ |
| Pac spc | ENSMUSG00<br>000057897.10 | <i>Camk2b</i>             | chr11:5969643-<br>6066362    | 0.3 | 4.0  | 5.5 | $2.1 \times 10^{-2}$ |
| Pac spc | ENSMUSG00<br>000002028.8  | <i>Kmt2a</i>              | chr9:44803354-<br>44881296   | 1.2 | 9.0  | 5.5 | $4.3 \times 10^{-3}$ |
| Pac spc | ENSMUSG00<br>000020097.10 | <i>Sgpl1</i>              | chr10:61098641<br>-61147703  | 2.4 | 15.4 | 5.5 | $4.3 \times 10^{-3}$ |
| Pac spc | ENSMUSG00<br>000037824.5  | <i>Tspan14</i>            | chr14:40906444<br>-40966807  | 1.0 | 7.6  | 5.5 | $1.3 \times 10^{-2}$ |
| Pac spc | ENSMUSG00<br>000030084.7  | <i>Plxna1</i>             | chr6:89304629-<br>89362613   | 3.2 | 20.0 | 5.5 | $4.3 \times 10^{-3}$ |
| Pac spc | ENSMUSG00<br>000039262.12 | <i>Prrc2b</i>             | chr2:32151081-<br>32236382   | 1.8 | 12.0 | 5.5 | $1.7 \times 10^{-2}$ |
| Pac spc | ENSMUSG00<br>000066687.4  | <i>Zbtb16</i>             | chr9:48654310-<br>48835945   | 0.9 | 7.0  | 5.5 | $4.3 \times 10^{-3}$ |
| Pac spc | ENSMUSG00<br>000029804.12 | <i>Herc3</i>              | chr6:58831464-<br>58920398   | 0.8 | 6.5  | 5.5 | $4.3 \times 10^{-3}$ |
| Pac spc | ENSMUSG00<br>000020653.7  | <i>Klf11</i>              | chr12:24651370<br>-24662774  | 1.2 | 8.7  | 5.5 | $1.4 \times 10^{-2}$ |
| Pac spc | ENSMUSG00<br>000005413.7  | <i>Hmox1</i>              | chr8:75093590-<br>75100596   | 0.6 | 5.3  | 5.4 | $4.2 \times 10^{-2}$ |
| Pac spc | ENSMUSG00<br>000028032.9  | <i>Papss1</i>             | chr3:131564767<br>-131643670 | 0.8 | 6.5  | 5.4 | $1.3 \times 10^{-2}$ |
| Pac spc | ENSMUSG00<br>000041936.14 | <i>Agrn</i>               | chr4:156165289<br>-156197488 | 0.9 | 7.2  | 5.4 | $2.6 \times 10^{-2}$ |
| Pac spc | ENSMUSG00<br>000045237.5  | <i>1110012L<br/>19Rik</i> | chrX:70385876-<br>70389417   | 0.0 | 2.2  | 5.4 | $4.3 \times 10^{-3}$ |
| Pac spc | ENSMUSG00<br>000031167.12 | <i>Rbm3</i>               | chrX:8138974-<br>8147964     | 2.4 | 15.1 | 5.4 | $3.3 \times 10^{-2}$ |
| Pac spc | ENSMUSG00<br>000044150.8  | <i>A830080D<br/>01Rik</i> | chrX:15952668<br>7-159593081 | 1.2 | 8.4  | 5.4 | $1.8 \times 10^{-2}$ |
| Pac spc | ENSMUSG00<br>000017561.12 | <i>Crlf3</i>              | chr11:80046492<br>-80080991  | 1.2 | 8.5  | 5.4 | $3.2 \times 10^{-2}$ |
| Pac spc | ENSMUSG00<br>000045294.10 | <i>Insig1</i>             | chr5:28071362-<br>28078662   | 3.1 | 19.0 | 5.4 | $7.0 \times 10^{-3}$ |
| Pac spc | ENSMUSG00<br>000001506.10 | <i>Col1a1</i>             | chr11:94936223<br>-94953042  | 0.1 | 3.0  | 5.4 | $1.8 \times 10^{-2}$ |
| Pac spc | ENSMUSG00<br>000045659.13 | <i>Plekha7</i>            | chr7:116123492<br>-116308376 | 0.6 | 5.2  | 5.4 | $4.3 \times 10^{-3}$ |
| Pac spc | ENSMUSG00<br>000007379.11 | <i>Dennd2c</i>            | chr3:103102603<br>-103169769 | 0.8 | 6.5  | 5.4 | $3.8 \times 10^{-2}$ |
| Pac spc | ENSMUSG00<br>000033434.11 | <i>Gtpbp6</i>             | chr5:110099968<br>-110108197 | 3.5 | 20.7 | 5.4 | $3.8 \times 10^{-2}$ |
| Pac spc | ENSMUSG00<br>000021996.12 | <i>Esd</i>                | chr14:74732296<br>-74750765  | 4.1 | 24.0 | 5.3 | $3.2 \times 10^{-2}$ |

|         |                      |                      |                           |     |      |     |                      |
|---------|----------------------|----------------------|---------------------------|-----|------|-----|----------------------|
| Pac spc | ENSMUSG0000057541.10 | <i>Pus7</i>          | chr5:23740647-23783711    | 1.3 | 9.2  | 5.3 | $2.1 \times 10^{-2}$ |
| Pac spc | ENSMUSG0000013089.11 | <i>Etv5</i>          | chr16:22381308-22439719   | 0.4 | 4.3  | 5.3 | $1.9 \times 10^{-2}$ |
| Pac spc | ENSMUSG0000008489.14 | <i>Elavl2</i>        | chr4:91250762-91400785    | 1.2 | 8.5  | 5.3 | $2.5 \times 10^{-2}$ |
| Pac spc | ENSMUSG0000022178.10 | <i>Ajuba</i>         | chr14:54567468-54577661   | 0.6 | 5.4  | 5.3 | $7.0 \times 10^{-3}$ |
| Pac spc | ENSMUSG0000038437.7  | <i>Mllt6</i>         | chr11:97663216-97685463   | 1.3 | 8.7  | 5.3 | $4.3 \times 10^{-3}$ |
| Pac spc | ENSMUSG0000000838.13 | <i>Fmr1</i>          | chrX:68678484-68717963    | 3.1 | 18.2 | 5.3 | $4.3 \times 10^{-3}$ |
| Pac spc | ENSMUSG0000028654.9  | <i>Mycl</i>          | chr4:122995651-123002485  | 0.1 | 2.7  | 5.3 | $1.9 \times 10^{-2}$ |
| Pac spc | ENSMUSG0000034771.11 | <i>Tle2</i>          | chr10:81572611-81590845   | 0.2 | 2.9  | 5.2 | $4.3 \times 10^{-3}$ |
| Pac spc | ENSMUSG0000025795.7  | <i>Rassf3</i>        | chr10:121410349-121476250 | 0.2 | 3.2  | 5.2 | $4.1 \times 10^{-2}$ |
| Pac spc | ENSMUSG0000028405.9  | <i>Aco1</i>          | chr4:40143080-40198338    | 0.6 | 5.3  | 5.2 | $1.7 \times 10^{-2}$ |
| Pac spc | ENSMUSG0000048240.10 | <i>Gng7</i>          | chr10:80948623-81014945   | 0.1 | 2.8  | 5.2 | $3.5 \times 10^{-2}$ |
| Pac spc | ENSMUSG0000052373.10 | <i>Mpp3</i>          | chr11:101999651-102028461 | 0.2 | 3.2  | 5.2 | $4.0 \times 10^{-2}$ |
| Pac spc | ENSMUSG0000018899.12 | <i>Irf1</i>          | chr11:53770013-53778374   | 0.4 | 4.1  | 5.2 | $1.1 \times 10^{-2}$ |
| Pac spc | ENSMUSG0000097119.1  | <i>B230354K17Rik</i> | chr17:45433851-45442544   | 1.5 | 9.6  | 5.2 | $4.3 \times 10^{-3}$ |
| Pac spc | ENSMUSG0000034160.9  | <i>Ogt</i>           | chrX:101640059-101684351  | 1.7 | 10.9 | 5.1 | $1.6 \times 10^{-2}$ |
| Pac spc | ENSMUSG0000037315.10 | <i>Jade3</i>         | chrX:20425687-20519939    | 1.2 | 8.5  | 5.1 | $4.0 \times 10^{-2}$ |
| Pac spc | ENSMUSG0000036591.11 | <i>Arhgap21</i>      | chr2:20847918-20968881    | 1.4 | 9.4  | 5.1 | $1.8 \times 10^{-2}$ |
| Pac spc | ENSMUSG0000002059.13 | <i>Rab34</i>         | chr11:78188429-78192193   | 0.7 | 5.8  | 5.1 | $2.8 \times 10^{-2}$ |
| Pac spc | ENSMUSG0000017009.3  | <i>Sdc4</i>          | chr2:164424246-164443887  | 1.4 | 9.0  | 5.1 | $1.9 \times 10^{-2}$ |
| Pac spc | ENSMUSG0000029822.11 | <i>Osbpl3</i>        | chr6:50293329-50456201    | 0.1 | 2.7  | 5.1 | $1.1 \times 10^{-2}$ |
| Pac spc | ENSMUSG0000045411.12 | <i>2410002F23Rik</i> | chr7:44246721-44262720    | 4.7 | 25.7 | 5.1 | $1.8 \times 10^{-2}$ |
| Pac spc | ENSMUSG0000102859.1  | <i>RP23-20B1.1</i>   | chr3:73933045-73934122    | 0.0 | 2.0  | 5.1 | $4.3 \times 10^{-3}$ |
| Pac spc | ENSMUSG0000003070.6  | <i>Efna2</i>         | chr10:80179481-80190010   | 0.3 | 3.3  | 5.0 | $4.0 \times 10^{-2}$ |
| Pac spc | ENSMUSG0000038072.10 | <i>Galnt11</i>       | chr5:25222847-25265918    | 0.9 | 6.8  | 5.0 | $2.2 \times 10^{-2}$ |
| Pac spc | ENSMUSG0000022390.10 | <i>Zc3h7b</i>        | chr15:81744847-81796269   | 1.6 | 10.1 | 5.0 | $4.3 \times 10^{-3}$ |
| Pac spc | ENSMUSG0000031012.13 | <i>Cask</i>          | chrX:13517079-13851367    | 0.4 | 4.0  | 5.0 | $2.9 \times 10^{-2}$ |
| Pac spc | ENSMUSG0000037706.12 | <i>Cd81</i>          | chr7:143021783-143067934  | 2.1 | 12.3 | 4.9 | $3.9 \times 10^{-2}$ |
| Pac spc | ENSMUSG0000040732.14 | <i>Erg</i>           | chr16:95359168-95586593   | 0.2 | 3.1  | 4.9 | $1.5 \times 10^{-2}$ |
| Pac spc | ENSMUSG0000060216.11 | <i>Arrb2</i>         | chr11:70432634-70440828   | 0.9 | 6.5  | 4.9 | $4.9 \times 10^{-2}$ |

|         |                           |                           |                               |     |      |     |                      |
|---------|---------------------------|---------------------------|-------------------------------|-----|------|-----|----------------------|
| Pac spc | ENSMUSG00<br>000031150.8  | <i>Ccdc120</i>            | chrX:7731713-<br>7750905      | 0.1 | 2.4  | 4.9 | $1.1 \times 10^{-2}$ |
| Pac spc | ENSMUSG00<br>000038677.9  | <i>Scube3</i>             | chr17:28142315<br>-28174852   | 0.7 | 5.2  | 4.9 | $1.8 \times 10^{-2}$ |
| Pac spc | ENSMUSG00<br>000020923.13 | <i>Ubt1</i>               | chr11:10230455<br>9-102319742 | 2.7 | 15.0 | 4.9 | $1.3 \times 10^{-2}$ |
| Pac spc | ENSMUSG00<br>000024640.5  | <i>Psat1</i>              | chr19:15904677<br>-15947337   | 2.6 | 14.7 | 4.9 | $1.9 \times 10^{-2}$ |
| Pac spc | ENSMUSG00<br>000103643.1  | <i>RP24-<br/>271K21.1</i> | chr3:32260332-<br>32261104    | 0.0 | 1.9  | 4.9 | $4.9 \times 10^{-2}$ |
| Pac spc | ENSMUSG00<br>000021318.11 | <i>Gli3</i>               | chr13:15440301<br>-15730026   | 1.1 | 7.2  | 4.8 | $3.9 \times 10^{-2}$ |
| Pac spc | ENSMUSG00<br>000031558.11 | <i>Slit2</i>              | chr5:47983154-<br>48306282    | 0.7 | 5.2  | 4.8 | $4.9 \times 10^{-2}$ |
| Pac spc | ENSMUSG00<br>000079584.2  | <i>Gm364</i>              | chrX:57409153-<br>57488767    | 4.3 | 22.3 | 4.8 | $1.7 \times 10^{-2}$ |
| Pac spc | ENSMUSG00<br>000005125.8  | <i>Ndr1</i>               | chr15:66929320<br>-67013039   | 0.3 | 3.2  | 4.8 | $1.4 \times 10^{-2}$ |
| Pac spc | ENSMUSG00<br>000042515.9  | <i>Mum1l1</i>             | chrX:13921004<br>1-139238335  | 0.8 | 5.7  | 4.7 | $1.3 \times 10^{-2}$ |
| Pac spc | ENSMUSG00<br>000067873.7  | <i>Htatsf1</i>            | chrX:57053582-<br>57067183    | 0.8 | 5.6  | 4.7 | $1.4 \times 10^{-2}$ |
| Pac spc | ENSMUSG00<br>000090673.1  | <i>Gm340</i>              | chr19:41582369<br>-41586536   | 0.9 | 6.3  | 4.7 | $2.9 \times 10^{-2}$ |
| Pac spc | ENSMUSG00<br>000037712.11 | <i>Fermt2</i>             | chr14:45458791<br>-45530118   | 0.8 | 5.8  | 4.7 | $2.6 \times 10^{-2}$ |
| Pac spc | ENSMUSG00<br>000008435.11 | <i>Rdh13</i>              | chr7:4424769-<br>4445649      | 0.3 | 3.2  | 4.7 | $1.7 \times 10^{-2}$ |
| Pac spc | ENSMUSG00<br>000031397.7  | <i>Tkt1</i>               | chrX:74177258-<br>74208500    | 1.6 | 9.5  | 4.7 | $3.1 \times 10^{-2}$ |
| Pac spc | ENSMUSG00<br>000061731.5  | <i>Ext1</i>               | chr15:53064037<br>-53346159   | 0.5 | 4.1  | 4.7 | $2.4 \times 10^{-2}$ |
| Pac spc | ENSMUSG00<br>000017724.10 | <i>Etv4</i>               | chr11:10176974<br>1-101785371 | 0.3 | 3.3  | 4.7 | $2.9 \times 10^{-2}$ |
| Pac spc | ENSMUSG00<br>000024070.11 | <i>Prkd3</i>              | chr17:78949404<br>-79020816   | 2.7 | 14.6 | 4.7 | $1.4 \times 10^{-2}$ |
| Pac spc | ENSMUSG00<br>000031314.13 | <i>Taf1</i>               | chrX:10153273<br>3-101601789  | 2.1 | 11.7 | 4.7 | $4.1 \times 10^{-2}$ |
| Pac spc | ENSMUSG00<br>000031214.9  | <i>Ophn1</i>              | chrX:98554276-<br>98891025    | 1.0 | 6.5  | 4.7 | $1.7 \times 10^{-2}$ |
| Pac spc | ENSMUSG00<br>000032511.13 | <i>Scn5a</i>              | chr9:119483407<br>-119579016  | 0.3 | 3.4  | 4.7 | $4.3 \times 10^{-3}$ |
| Pac spc | ENSMUSG00<br>000025246.9  | <i>Tbl1x</i>              | chrX:77511012-<br>77662983    | 0.7 | 4.9  | 4.7 | $1.9 \times 10^{-2}$ |
| Pac spc | ENSMUSG00<br>000067768.8  | <i>Xlr4b</i>              | chrX:73107634-<br>73292976    | 0.0 | 2.0  | 4.6 | $3.8 \times 10^{-2}$ |
| Pac spc | ENSMUSG00<br>000022429.10 | <i>Dmc1</i>               | chr15:79561499<br>-79605084   | 1.6 | 9.2  | 4.6 | $2.6 \times 10^{-2}$ |
| Pac spc | ENSMUSG00<br>000002900.11 | <i>Lamb1</i>              | chr12:31265233<br>-31329644   | 0.5 | 4.2  | 4.6 | $1.6 \times 10^{-2}$ |
| Pac spc | ENSMUSG00<br>000032936.9  | <i>Camkv</i>              | chr9:107935076<br>-107949691  | 0.4 | 3.7  | 4.6 | $2.6 \times 10^{-2}$ |
| Pac spc | ENSMUSG00<br>000029366.9  | <i>Dck</i>                | chr5:88764995-<br>88783281    | 0.8 | 5.3  | 4.6 | $1.3 \times 10^{-2}$ |
| Pac spc | ENSMUSG00<br>000026860.12 | <i>Sh3glb2</i>            | chr2:30344808-<br>30359337    | 2.4 | 13.0 | 4.6 | $3.0 \times 10^{-2}$ |
| Pac spc | ENSMUSG00<br>000029998.10 | <i>Pcyox1</i>             | chr6:86386005-<br>86397150    | 0.3 | 3.3  | 4.6 | $2.5 \times 10^{-2}$ |

|         |                           |                           |                               |     |      |     |                      |
|---------|---------------------------|---------------------------|-------------------------------|-----|------|-----|----------------------|
| Pac spc | ENSMUSG00<br>000013936.8  | <i>Myl2</i>               | chr5:122100950<br>-122138957  | 0.0 | 1.8  | 4.6 | $4.3 \times 10^{-3}$ |
| Pac spc | ENSMUSG00<br>000009941.6  | <i>Nxf2</i>               | chrX:13494452<br>5-134964754  | 2.0 | 10.9 | 4.6 | $2.9 \times 10^{-2}$ |
| Pac spc | ENSMUSG00<br>000028080.11 | <i>Lrba</i>               | chr3:86224679-<br>86782692    | 3.0 | 15.5 | 4.5 | $4.3 \times 10^{-3}$ |
| Pac spc | ENSMUSG00<br>000036989.11 | <i>Trim3</i>              | chr7:105604462<br>-105633571  | 1.0 | 6.1  | 4.5 | $4.0 \times 10^{-2}$ |
| Pac spc | ENSMUSG00<br>000027395.11 | <i>Polr1b</i>             | chr2:129100994<br>-129126594  | 3.4 | 17.1 | 4.5 | $4.3 \times 10^{-3}$ |
| Pac spc | ENSMUSG00<br>000026643.12 | <i>Nmt2</i>               | chr2:3284211-<br>3328877      | 6.5 | 31.2 | 4.5 | $7.0 \times 10^{-3}$ |
| Pac spc | ENSMUSG00<br>000024811.7  | <i>Tnks2</i>              | chr19:36834231<br>-36893477   | 5.6 | 26.9 | 4.5 | $4.3 \times 10^{-3}$ |
| Pac spc | ENSMUSG00<br>000020432.8  | <i>Tcn2</i>               | chr11:3917191-<br>3932159     | 0.3 | 3.0  | 4.5 | $3.8 \times 10^{-2}$ |
| Pac spc | ENSMUSG00<br>000063239.12 | <i>Grm4</i>               | chr17:27422386<br>-27513341   | 0.1 | 2.1  | 4.5 | $3.6 \times 10^{-2}$ |
| Pac spc | ENSMUSG00<br>000089989.5  | <i>Flt3l</i>              | chr7:45125557-<br>45136432    | 0.3 | 3.0  | 4.5 | $4.8 \times 10^{-2}$ |
| Pac spc | ENSMUSG00<br>000026192.9  | <i>Atic</i>               | chr1:71557149-<br>71579631    | 2.2 | 11.6 | 4.5 | $9.2 \times 10^{-3}$ |
| Pac spc | ENSMUSG00<br>000037553.10 | <i>Zdhc18</i>             | chr4:133605298<br>-133650154  | 0.7 | 4.8  | 4.5 | $3.9 \times 10^{-2}$ |
| Pac spc | ENSMUSG00<br>000042644.8  | <i>Itpr3</i>              | chr17:27057303<br>-27122223   | 0.7 | 4.9  | 4.5 | $1.1 \times 10^{-2}$ |
| Pac spc | ENSMUSG00<br>000020715.5  | <i>Ern1</i>               | chr11:10639464<br>9-106487852 | 2.1 | 11.1 | 4.5 | $1.1 \times 10^{-2}$ |
| Pac spc | ENSMUSG00<br>000021069.12 | <i>Pygl</i>               | chr12:70190810<br>-70234165   | 0.5 | 3.8  | 4.4 | $4.5 \times 10^{-2}$ |
| Pac spc | ENSMUSG00<br>000047098.13 | <i>Rnf31</i>              | chr14:55591707<br>-55610030   | 2.2 | 11.5 | 4.4 | $2.7 \times 10^{-2}$ |
| Pac spc | ENSMUSG00<br>000030110.9  | <i>Ret</i>                | chr6:118151747<br>-118197744  | 0.1 | 2.1  | 4.4 | $2.8 \times 10^{-2}$ |
| Pac spc | ENSMUSG00<br>000045071.9  | <i>E130308A<br/>19Rik</i> | chr4:59626210-<br>59761439    | 0.7 | 4.6  | 4.4 | $3.2 \times 10^{-2}$ |
| Pac spc | ENSMUSG00<br>000016757.6  | <i>Ttl12</i>              | chr15:83575118<br>-83595157   | 1.4 | 8.1  | 4.4 | $4.3 \times 10^{-3}$ |
| Pac spc | ENSMUSG00<br>000021109.9  | <i>Hif1a</i>              | chr12:73901374<br>-73949785   | 2.3 | 11.9 | 4.4 | $4.3 \times 10^{-2}$ |
| Pac spc | ENSMUSG00<br>000034311.3  | <i>Kif4</i>               | chrX:10062288<br>2-100727214  | 0.6 | 4.5  | 4.4 | $1.7 \times 10^{-2}$ |
| Pac spc | ENSMUSG00<br>000002058.9  | <i>Unc119</i>             | chr11:78343481<br>-78349164   | 1.6 | 9.0  | 4.4 | $1.5 \times 10^{-2}$ |
| Pac spc | ENSMUSG00<br>000103155.1  | <i>RP23-<br/>234G15.1</i> | chr3:54021163-<br>54021909    | 0.0 | 1.7  | 4.4 | $4.3 \times 10^{-3}$ |
| Pac spc | ENSMUSG00<br>000062949.9  | <i>Atp11c</i>             | chrX:60223289-<br>60807993    | 1.4 | 7.6  | 4.4 | $1.9 \times 10^{-2}$ |
| Pac spc | ENSMUSG00<br>000049672.10 | <i>Zbtb14</i>             | chr17:69383049<br>-69390750   | 0.3 | 2.9  | 4.4 | $4.6 \times 10^{-2}$ |
| Pac spc | ENSMUSG00<br>000028527.14 | <i>Ak4</i>                | chr4:101419276<br>-101466995  | 1.6 | 8.9  | 4.4 | $9.2 \times 10^{-3}$ |
| Pac spc | ENSMUSG00<br>000015243.4  | <i>Abca1</i>              | chr4:53030786-<br>53159895    | 0.6 | 4.5  | 4.4 | $4.3 \times 10^{-3}$ |
| Pac spc | ENSMUSG00<br>000025105.8  | <i>Bnc1</i>               | chr7:81966671-<br>81992618    | 0.6 | 4.2  | 4.4 | $2.8 \times 10^{-2}$ |
| Pac spc | ENSMUSG00<br>000033295.9  | <i>Ptprf</i>              | chr4:118208212<br>-118291405  | 6.7 | 31.0 | 4.4 | $4.3 \times 10^{-3}$ |

|         |                      |                |                           |     |      |     |                      |
|---------|----------------------|----------------|---------------------------|-----|------|-----|----------------------|
| Pac spc | ENSMUSG0000040363.10 | <i>Bcor</i>    | chrX:12036739-12160355    | 0.2 | 2.4  | 4.4 | $3.7 \times 10^{-2}$ |
| Pac spc | ENSMUSG0000026193.11 | <i>Fn1</i>     | chr1:71585519-71662843    | 3.5 | 16.9 | 4.3 | $9.2 \times 10^{-3}$ |
| Pac spc | ENSMUSG0000040856.13 | <i>Dlk1</i>    | chr12:109452822-109463336 | 0.3 | 3.2  | 4.3 | $3.3 \times 10^{-2}$ |
| Pac spc | ENSMUSG0000025854.11 | <i>Fam20c</i>  | chr5:138754513-138810077  | 0.0 | 1.9  | 4.3 | $4.6 \times 10^{-2}$ |
| Pac spc | ENSMUSG0000024909.10 | <i>Efemp2</i>  | chr19:5473972-5481853     | 2.1 | 10.7 | 4.3 | $2.9 \times 10^{-2}$ |
| Pac spc | ENSMUSG0000050947.8  | <i>Amigo1</i>  | chr3:108186334-108192286  | 0.6 | 4.3  | 4.3 | $1.4 \times 10^{-2}$ |
| Pac spc | ENSMUSG0000029096.11 | <i>Htra3</i>   | chr5:35652040-35679782    | 0.1 | 2.0  | 4.3 | $1.8 \times 10^{-2}$ |
| Pac spc | ENSMUSG0000057530.10 | <i>Ece1</i>    | chr4:137862236-137965229  | 0.9 | 5.5  | 4.3 | $4.6 \times 10^{-2}$ |
| Pac spc | ENSMUSG0000033170.10 | <i>Card10</i>  | chr15:78775137-78803042   | 0.3 | 3.0  | 4.3 | $2.0 \times 10^{-2}$ |
| Pac spc | ENSMUSG0000069044.6  | <i>Usp9y</i>   | chrY:1298960-1459782      | 0.7 | 4.5  | 4.3 | $4.0 \times 10^{-2}$ |
| Pac spc | ENSMUSG0000026641.9  | <i>Usf1</i>    | chr1:171411312-171420352  | 1.8 | 9.1  | 4.3 | $4.9 \times 10^{-2}$ |
| Pac spc | ENSMUSG0000032366.11 | <i>Tpm1</i>    | chr9:67022589-67049406    | 0.7 | 4.4  | 4.2 | $4.3 \times 10^{-3}$ |
| Pac spc | ENSMUSG0000022175.8  | <i>Lrp10</i>   | chr14:54464163-54471497   | 0.5 | 3.7  | 4.2 | $2.3 \times 10^{-2}$ |
| Pac spc | ENSMUSG0000037552.13 | <i>Plekhg2</i> | chr7:28359603-28372599    | 4.5 | 20.4 | 4.2 | $1.1 \times 10^{-2}$ |
| Pac spc | ENSMUSG0000020167.10 | <i>Tcf3</i>    | chr10:80409513-80433647   | 4.5 | 20.3 | 4.2 | $1.1 \times 10^{-2}$ |
| Pac spc | ENSMUSG0000030872.10 | <i>Gga2</i>    | chr7:121986721-122021222  | 1.9 | 9.7  | 4.2 | $2.9 \times 10^{-2}$ |
| Pac spc | ENSMUSG0000038576.11 | <i>Susd4</i>   | chr1:182763859-182896591  | 0.1 | 2.1  | 4.2 | $3.7 \times 10^{-2}$ |
| Pac spc | ENSMUSG0000055067.11 | <i>Smyd3</i>   | chr1:178951959-179518041  | 5.0 | 22.4 | 4.2 | $3.1 \times 10^{-2}$ |
| Pac spc | ENSMUSG0000059895.8  | <i>Ptp4a3</i>  | chr15:73723144-73758766   | 2.0 | 10.0 | 4.2 | $1.5 \times 10^{-2}$ |
| Pac spc | ENSMUSG0000008682.9  | <i>Rpl10</i>   | chrX:74270811-74273135    | 4.7 | 21.1 | 4.1 | $2.6 \times 10^{-2}$ |
| Pac spc | ENSMUSG0000039713.12 | <i>Plekhg5</i> | chr4:152072497-152115400  | 0.7 | 4.6  | 4.1 | $2.0 \times 10^{-2}$ |
| Pac spc | ENSMUSG0000032311.13 | <i>Nrg4</i>    | chr9:55208924-55326844    | 0.3 | 2.6  | 4.1 | $1.3 \times 10^{-2}$ |
| Pac spc | ENSMUSG0000053436.10 | <i>Mapk14</i>  | chr17:28691341-28748404   | 3.1 | 14.3 | 4.1 | $2.5 \times 10^{-2}$ |
| Pac spc | ENSMUSG0000031523.12 | <i>Dlc1</i>    | chr8:36567750-36953143    | 0.3 | 2.9  | 4.1 | $4.3 \times 10^{-3}$ |
| Pac spc | ENSMUSG0000035284.9  | <i>Vps13c</i>  | chr9:67840395-67995634    | 2.3 | 10.9 | 4.0 | $4.3 \times 10^{-3}$ |
| Pac spc | ENSMUSG0000063382.5  | <i>Bcl9l</i>   | chr9:44499135-44510388    | 0.9 | 5.0  | 4.0 | $1.4 \times 10^{-2}$ |
| Pac spc | ENSMUSG0000034708.7  | <i>Grn</i>     | chr11:102430314-102447682 | 1.3 | 6.6  | 4.0 | $4.0 \times 10^{-2}$ |
| Pac spc | ENSMUSG0000035621.9  | <i>Midn</i>    | chr10:80148271-80158368   | 2.6 | 11.8 | 4.0 | $9.2 \times 10^{-3}$ |
| Pac spc | ENSMUSG0000056153.10 | <i>Socs6</i>   | chr18:88665223-88927481   | 1.5 | 7.6  | 4.0 | $2.1 \times 10^{-2}$ |

|         |                           |                |                              |      |      |     |                      |
|---------|---------------------------|----------------|------------------------------|------|------|-----|----------------------|
| Pac spc | ENSMUSG00<br>000059991.6  | <i>Nptx2</i>   | chr5:144545886<br>-144557478 | 1.7  | 8.5  | 4.0 | $1.1 \times 10^{-2}$ |
| Pac spc | ENSMUSG00<br>000025269.12 | <i>Apex2</i>   | chrX:15051951<br>8-150643878 | 0.3  | 2.8  | 4.0 | $1.9 \times 10^{-2}$ |
| Pac spc | ENSMUSG00<br>000013629.12 | <i>Cad</i>     | chr5:31054779-<br>31078479   | 10.2 | 42.1 | 4.0 | $3.1 \times 10^{-2}$ |
| Pac spc | ENSMUSG00<br>000025019.11 | <i>Lcor</i>    | chr19:41482644<br>-41562246  | 1.3  | 6.8  | 4.0 | $2.5 \times 10^{-2}$ |
| Pac spc | ENSMUSG00<br>000028633.7  | <i>Ctps</i>    | chr4:120539867<br>-120570276 | 3.3  | 14.8 | 4.0 | $2.2 \times 10^{-2}$ |
| Pac spc | ENSMUSG00<br>000070462.4  | <i>Mesdc1</i>  | chr7:83879872-<br>83884305   | 0.1  | 2.1  | 4.0 | $3.9 \times 10^{-2}$ |
| Pac spc | ENSMUSG00<br>000003545.2  | <i>Fosb</i>    | chr7:19302720-<br>19310045   | 0.6  | 3.9  | 4.0 | $3.2 \times 10^{-2}$ |
| Pac spc | ENSMUSG00<br>000032280.12 | <i>Tle3</i>    | chr9:61372365-<br>61418497   | 8.4  | 34.8 | 4.0 | $1.3 \times 10^{-2}$ |
| Pac spc | ENSMUSG00<br>000025612.5  | <i>Bach1</i>   | chr16:87698944<br>-87733346  | 0.5  | 3.7  | 4.0 | $2.7 \times 10^{-2}$ |
| Pac spc | ENSMUSG00<br>000042035.7  | <i>Igsf3</i>   | chr3:101377124<br>-101463059 | 1.6  | 7.9  | 4.0 | $7.0 \times 10^{-3}$ |
| Pac spc | ENSMUSG00<br>000059316.2  | <i>Slc27a4</i> | chr2:29802633-<br>29817522   | 1.6  | 7.9  | 3.9 | $1.5 \times 10^{-2}$ |
| Pac spc | ENSMUSG00<br>000031386.10 | <i>Hcfc1</i>   | chrX:73942791-<br>73966357   | 2.4  | 11.0 | 3.9 | $1.8 \times 10^{-2}$ |
| Pac spc | ENSMUSG00<br>000001034.13 | <i>Mapk7</i>   | chr11:61485430<br>-61494406  | 7.0  | 29.1 | 3.9 | $7.0 \times 10^{-3}$ |
| Pac spc | ENSMUSG00<br>000027087.7  | <i>Itgav</i>   | chr2:83724396-<br>83806916   | 0.2  | 2.3  | 3.9 | $4.3 \times 10^{-3}$ |
| Pac spc | ENSMUSG00<br>000029767.12 | <i>Calu</i>    | chr6:29348068-<br>29388468   | 4.8  | 20.4 | 3.9 | $4.3 \times 10^{-3}$ |
| Pac spc | ENSMUSG00<br>000041329.9  | <i>Atp1b2</i>  | chr11:69599735<br>-69605942  | 1.0  | 5.6  | 3.9 | $3.0 \times 10^{-2}$ |
| Pac spc | ENSMUSG00<br>000034472.9  | <i>Rasd2</i>   | chr8:75213943-<br>75224113   | 1.8  | 8.4  | 3.9 | $2.7 \times 10^{-2}$ |
| Pac spc | ENSMUSG00<br>000051592.10 | <i>Ccnb3</i>   | chrX:6979651-<br>7041619     | 0.8  | 4.4  | 3.9 | $3.5 \times 10^{-2}$ |
| Pac spc | ENSMUSG00<br>000018651.10 | <i>Tada2a</i>  | chr11:84078919<br>-84129600  | 1.8  | 8.5  | 3.9 | $3.0 \times 10^{-2}$ |
| Pac spc | ENSMUSG00<br>000060671.8  | <i>Atp8b2</i>  | chr3:89939480-<br>89963508   | 3.9  | 16.5 | 3.9 | $1.7 \times 10^{-2}$ |
| Pac spc | ENSMUSG00<br>000028444.13 | <i>Cntfr</i>   | chr4:41657497-<br>41697089   | 0.8  | 4.4  | 3.9 | $2.9 \times 10^{-2}$ |
| Pac spc | ENSMUSG00<br>000042686.5  | <i>Jph1</i>    | chr1:16898184-<br>17097889   | 0.4  | 3.0  | 3.9 | $3.0 \times 10^{-2}$ |
| Pac spc | ENSMUSG00<br>000041263.10 | <i>Rusc1</i>   | chr3:89083980-<br>89093363   | 0.1  | 1.9  | 3.9 | $3.3 \times 10^{-2}$ |
| Pac spc | ENSMUSG00<br>000048752.3  | <i>Prss50</i>  | chr9:110857966<br>-110864628 | 6.6  | 27.1 | 3.9 | $1.1 \times 10^{-2}$ |
| Pac spc | ENSMUSG00<br>000025809.11 | <i>Itgb1</i>   | chr8:128685653<br>-128733200 | 4.5  | 18.8 | 3.8 | $1.6 \times 10^{-2}$ |
| Pac spc | ENSMUSG00<br>000026837.11 | <i>Col5a1</i>  | chr2:27882924-<br>28039514   | 0.9  | 4.8  | 3.8 | $4.3 \times 10^{-3}$ |
| Pac spc | ENSMUSG00<br>000020821.13 | <i>Kif1c</i>   | chr11:70700547<br>-70731964  | 2.2  | 9.7  | 3.8 | $1.6 \times 10^{-2}$ |
| Pac spc | ENSMUSG00<br>000019943.9  | <i>Atp2b1</i>  | chr10:98915151<br>-99026143  | 0.9  | 4.7  | 3.8 | $1.4 \times 10^{-2}$ |
| Pac spc | ENSMUSG00<br>000015501.6  | <i>Hivep2</i>  | chr10:13966074<br>-14154446  | 0.2  | 2.2  | 3.8 | $4.3 \times 10^{-3}$ |

|         |                      |                 |                           |     |      |     |                      |
|---------|----------------------|-----------------|---------------------------|-----|------|-----|----------------------|
| Pac spc | ENSMUSG0000029676.11 | <i>Pot1a</i>    | chr6:25743736-25809246    | 2.2 | 9.7  | 3.8 | $4.8 \times 10^{-2}$ |
| Pac spc | ENSMUSG0000030201.11 | <i>Lrp6</i>     | chr6:134446475-134566965  | 2.1 | 9.3  | 3.8 | $4.3 \times 10^{-3}$ |
| Pac spc | ENSMUSG0000032228.12 | <i>Tcf12</i>    | chr9:71842687-72111871    | 9.5 | 36.8 | 3.8 | $1.8 \times 10^{-2}$ |
| Pac spc | ENSMUSG0000015944.8  | <i>Gatsl2</i>   | chr5:134099710-134144343  | 0.5 | 3.4  | 3.8 | $3.5 \times 10^{-2}$ |
| Pac spc | ENSMUSG0000048277.11 | <i>Syngn2</i>   | chr11:117809667-117839908 | 3.3 | 13.8 | 3.7 | $3.8 \times 10^{-2}$ |
| Pac spc | ENSMUSG0000045348.11 | <i>Nyap1</i>    | chr5:137730882-137741607  | 0.2 | 2.1  | 3.7 | $3.7 \times 10^{-2}$ |
| Pac spc | ENSMUSG0000029207.12 | <i>Apbb2</i>    | chr5:66298860-66618828    | 1.1 | 5.6  | 3.7 | $3.3 \times 10^{-2}$ |
| Pac spc | ENSMUSG0000025323.9  | <i>Sp4</i>      | chr12:118234932-118301440 | 1.2 | 5.8  | 3.7 | $1.7 \times 10^{-2}$ |
| Pac spc | ENSMUSG0000027794.4  | <i>Sohlh2</i>   | chr3:55182027-55209957    | 4.1 | 16.6 | 3.7 | $4.8 \times 10^{-2}$ |
| Pac spc | ENSMUSG0000038212.11 | <i>Hiatl1</i>   | chr13:65064662-65112982   | 3.2 | 13.2 | 3.7 | $3.1 \times 10^{-2}$ |
| Pac spc | ENSMUSG0000028906.11 | <i>Epb4.1</i>   | chr4:131923412-132076992  | 0.9 | 4.9  | 3.7 | $2.9 \times 10^{-2}$ |
| Pac spc | ENSMUSG0000052911.5  | <i>Lamb2</i>    | chr9:108479735-108490530  | 2.0 | 8.7  | 3.7 | $4.4 \times 10^{-2}$ |
| Pac spc | ENSMUSG0000048170.10 | <i>Mcmdbp</i>   | chr7:128696440-128740495  | 3.9 | 15.7 | 3.7 | $1.3 \times 10^{-2}$ |
| Pac spc | ENSMUSG0000060685.4  | <i>Gm14511</i>  | chrX:8975709-8976559      | 0.0 | 1.3  | 3.7 | $4.3 \times 10^{-3}$ |
| Pac spc | ENSMUSG0000042364.10 | <i>Snx18</i>    | chr13:113592179-113618564 | 1.3 | 6.0  | 3.7 | $1.6 \times 10^{-2}$ |
| Pac spc | ENSMUSG0000022436.11 | <i>Sh3bp1</i>   | chr15:78899666-78919517   | 1.0 | 5.1  | 3.7 | $1.7 \times 10^{-2}$ |
| Pac spc | ENSMUSG0000027353.10 | <i>Mcm8</i>     | chr2:132816140-132844197  | 2.6 | 10.8 | 3.7 | $4.2 \times 10^{-2}$ |
| Pac spc | ENSMUSG0000032875.7  | <i>Arhgef17</i> | chr7:100869745-100932161  | 0.3 | 2.5  | 3.6 | $1.8 \times 10^{-2}$ |
| Pac spc | ENSMUSG0000041415.9  | <i>Dicer1</i>   | chr12:104687741-104751952 | 3.0 | 12.1 | 3.6 | $4.3 \times 10^{-3}$ |
| Pac spc | ENSMUSG0000003500.9  | <i>Impdh1</i>   | chr6:29200433-29216364    | 1.7 | 7.5  | 3.6 | $4.0 \times 10^{-2}$ |
| Pac spc | ENSMUSG0000034413.10 | <i>Neurl1b</i>  | chr17:26414828-26446349   | 0.1 | 1.8  | 3.6 | $4.0 \times 10^{-2}$ |
| Pac spc | ENSMUSG0000037606.13 | <i>Osbpl5</i>   | chr7:143688761-143756985  | 0.1 | 1.6  | 3.6 | $3.9 \times 10^{-2}$ |
| Pac spc | ENSMUSG0000024130.11 | <i>Abca3</i>    | chr17:24351949-24414542   | 1.0 | 4.8  | 3.6 | $4.0 \times 10^{-2}$ |
| Pac spc | ENSMUSG0000095078.1  | <i>Gm5866</i>   | chr5:52582319-52583227    | 0.0 | 1.3  | 3.6 | $4.9 \times 10^{-2}$ |
| Pac spc | ENSMUSG0000071553.6  | <i>Cpa2</i>     | chr6:30541581-30564476    | 0.5 | 3.0  | 3.6 | $4.5 \times 10^{-2}$ |
| Pac spc | ENSMUSG0000027333.14 | <i>Smox</i>     | chr2:131491495-131525922  | 0.5 | 3.2  | 3.5 | $2.9 \times 10^{-2}$ |
| Pac spc | ENSMUSG0000018547.8  | <i>Pip4k2b</i>  | chr11:97715156-97744704   | 0.6 | 3.5  | 3.5 | $4.0 \times 10^{-2}$ |
| Pac spc | ENSMUSG0000032485.10 | <i>Scap</i>     | chr9:110333292-110384935  | 3.9 | 15.2 | 3.5 | $4.3 \times 10^{-3}$ |
| Pac spc | ENSMUSG0000031295.9  | <i>Phka2</i>    | chrX:160502165-160598878  | 3.2 | 12.7 | 3.5 | $4.3 \times 10^{-2}$ |

|         |                      |                      |                           |     |      |     |                      |
|---------|----------------------|----------------------|---------------------------|-----|------|-----|----------------------|
| Pac spc | ENSMUSG0000039967.10 | <i>Zfp292</i>        | chr4:34803112-34882960    | 2.2 | 8.9  | 3.5 | $7.0 \times 10^{-3}$ |
| Pac spc | ENSMUSG0000025586.12 | <i>Cpeb1</i>         | chr7:81347025-81455465    | 5.6 | 21.2 | 3.5 | $1.4 \times 10^{-2}$ |
| Pac spc | ENSMUSG0000031310.12 | <i>Zmym3</i>         | chrX:101404383-101420849  | 3.2 | 12.5 | 3.5 | $1.4 \times 10^{-2}$ |
| Pac spc | ENSMUSG0000045817.8  | <i>Zfp36l2</i>       | chr17:84183930-84187947   | 2.3 | 9.5  | 3.5 | $1.1 \times 10^{-2}$ |
| Pac spc | ENSMUSG0000033763.10 | <i>Mtss1l</i>        | chr8:110721475-110741400  | 1.1 | 5.3  | 3.5 | $4.5 \times 10^{-2}$ |
| Pac spc | ENSMUSG0000003410.7  | <i>Elavl3</i>        | chr9:22015004-22052023    | 0.3 | 2.3  | 3.5 | $1.5 \times 10^{-2}$ |
| Pac spc | ENSMUSG0000001924.11 | <i>Uba1</i>          | chrX:20658325-20683179    | 8.6 | 31.3 | 3.5 | $7.0 \times 10^{-3}$ |
| Pac spc | ENSMUSG0000050846.8  | <i>Zfp623</i>        | chr15:75940951-75949377   | 0.6 | 3.2  | 3.5 | $3.8 \times 10^{-2}$ |
| Pac spc | ENSMUSG0000031987.5  | <i>Egln1</i>         | chr8:124908595-124949254  | 0.5 | 2.8  | 3.5 | $3.1 \times 10^{-2}$ |
| Pac spc | ENSMUSG0000009596.5  | <i>Taf7l</i>         | chrX:134460117-134476490  | 8.1 | 29.5 | 3.5 | $4.3 \times 10^{-3}$ |
| Pac spc | ENSMUSG0000029478.12 | <i>Ncor2</i>         | chr5:125017152-125179219  | 4.5 | 16.8 | 3.5 | $4.3 \times 10^{-3}$ |
| Pac spc | ENSMUSG0000054520.11 | <i>Sh3bp2</i>        | chr5:34525837-34563638    | 0.4 | 2.8  | 3.5 | $4.0 \times 10^{-2}$ |
| Pac spc | ENSMUSG0000022350.6  | <i>E430025E21Rik</i> | chr15:59331997-59374167   | 2.0 | 8.1  | 3.5 | $4.0 \times 10^{-2}$ |
| Pac spc | ENSMUSG0000030757.9  | <i>Zkscan2</i>       | chr7:123479515-123500449  | 3.4 | 13.0 | 3.5 | $3.1 \times 10^{-2}$ |
| Pac spc | ENSMUSG0000063410.7  | <i>Stk24</i>         | chr14:121286342-121379334 | 0.6 | 3.2  | 3.5 | $4.8 \times 10^{-2}$ |
| Pac spc | ENSMUSG0000024074.7  | <i>Crim1</i>         | chr17:78200247-78376592   | 0.5 | 2.9  | 3.5 | $2.6 \times 10^{-2}$ |
| Pac spc | ENSMUSG0000051586.10 | <i>Mical3</i>        | chr6:120931706-121003153  | 1.6 | 6.6  | 3.5 | $3.6 \times 10^{-2}$ |
| Pac spc | ENSMUSG0000022443.12 | <i>Myh9</i>          | chr15:77760586-77842175   | 1.1 | 5.2  | 3.4 | $3.1 \times 10^{-2}$ |
| Pac spc | ENSMUSG0000026979.12 | <i>Psd4</i>          | chr2:24367579-24414954    | 0.1 | 1.4  | 3.4 | $9.2 \times 10^{-3}$ |
| Pac spc | ENSMUSG0000044167.6  | <i>Foxo1</i>         | chr3:52268335-52353221    | 1.5 | 6.3  | 3.4 | $4.3 \times 10^{-3}$ |
| Pac spc | ENSMUSG0000023927.11 | <i>Satb1</i>         | chr17:51736186-51834723   | 0.2 | 1.9  | 3.4 | $2.3 \times 10^{-2}$ |
| Pac spc | ENSMUSG0000062542.7  | <i>Syt9</i>          | chr7:107370727-107548656  | 1.0 | 4.8  | 3.4 | $3.5 \times 10^{-2}$ |
| Pac spc | ENSMUSG0000020422.9  | <i>Tns3</i>          | chr11:8431651-8664535     | 0.3 | 2.3  | 3.4 | $1.4 \times 10^{-2}$ |
| Pac spc | ENSMUSG0000046139.7  | <i>Patl1</i>         | chr19:11912398-11945096   | 2.6 | 10.0 | 3.4 | $1.9 \times 10^{-2}$ |
| Pac spc | ENSMUSG0000035778.13 | <i>Ggta1</i>         | chr2:35400178-35463231    | 0.1 | 1.7  | 3.4 | $3.1 \times 10^{-2}$ |
| Pac spc | ENSMUSG0000001507.12 | <i>Itga3</i>         | chr11:95044473-95076801   | 0.5 | 2.9  | 3.4 | $2.3 \times 10^{-2}$ |
| Pac spc | ENSMUSG0000022673.4  | <i>Mcm4</i>          | chr16:15623896-15637400   | 2.6 | 9.9  | 3.4 | $1.6 \times 10^{-2}$ |
| Pac spc | ENSMUSG0000037679.8  | <i>Inf2</i>          | chr12:112588783-112615556 | 0.4 | 2.5  | 3.4 | $3.8 \times 10^{-2}$ |
| Pac spc | ENSMUSG0000028530.10 | <i>Jak1</i>          | chr4:101068982-101265282  | 5.7 | 20.3 | 3.4 | $1.6 \times 10^{-2}$ |

|         |                           |                 |                               |      |       |     |                      |
|---------|---------------------------|-----------------|-------------------------------|------|-------|-----|----------------------|
| Pac spc | ENSMUSG00<br>000019256.13 | <i>Ahr</i>      | chr12:35497973<br>-35535038   | 0.2  | 1.7   | 3.4 | $4.8 \times 10^{-2}$ |
| Pac spc | ENSMUSG00<br>000074796.6  | <i>Slc4a11</i>  | chr2:130684112<br>-130697519  | 0.2  | 1.7   | 3.3 | $5.0 \times 10^{-2}$ |
| Pac spc | ENSMUSG00<br>000040007.8  | <i>Bahd1</i>    | chr2:118900376<br>-118924528  | 4.3  | 15.4  | 3.3 | $4.8 \times 10^{-2}$ |
| Pac spc | ENSMUSG00<br>000041225.12 | <i>Arhgap12</i> | chr18:6024426-<br>6136098     | 2.8  | 10.5  | 3.3 | $1.6 \times 10^{-2}$ |
| Pac spc | ENSMUSG00<br>000038160.6  | <i>Atg5</i>     | chr10:44268357<br>-44364291   | 1.7  | 6.7   | 3.3 | $4.0 \times 10^{-2}$ |
| Pac spc | ENSMUSG00<br>000036902.9  | <i>Neto2</i>    | chr8:85636587-<br>85690973    | 0.6  | 3.1   | 3.3 | $4.3 \times 10^{-2}$ |
| Pac spc | ENSMUSG00<br>000053716.9  | <i>Dusp7</i>    | chr9:106368631<br>-106375724  | 1.4  | 5.9   | 3.3 | $3.8 \times 10^{-2}$ |
| Pac spc | ENSMUSG00<br>000025151.12 | <i>Maged1</i>   | chrX:94535473-<br>94542143    | 4.9  | 17.5  | 3.3 | $7.0 \times 10^{-3}$ |
| Pac spc | ENSMUSG00<br>000027070.10 | <i>Lrp2</i>     | chr2:69424339-<br>69586065    | 0.1  | 1.6   | 3.3 | $2.4 \times 10^{-2}$ |
| Pac spc | ENSMUSG00<br>000032392.10 | <i>Parp16</i>   | chr9:65214689-<br>65239219    | 0.5  | 2.8   | 3.3 | $3.7 \times 10^{-2}$ |
| Pac spc | ENSMUSG00<br>000031328.11 | <i>Flna</i>     | chrX:74223460-<br>74249820    | 1.5  | 6.1   | 3.3 | $1.3 \times 10^{-2}$ |
| Pac spc | ENSMUSG00<br>000036523.12 | <i>Greb1</i>    | chr12:16670614<br>-16800886   | 0.2  | 1.8   | 3.3 | $2.9 \times 10^{-2}$ |
| Pac spc | ENSMUSG00<br>000098195.1  | <i>Gm7693</i>   | chr7:72712633-<br>72713621    | 0.0  | 1.1   | 3.2 | $4.3 \times 10^{-3}$ |
| Pac spc | ENSMUSG00<br>000051790.11 | <i>Nlgn2</i>    | chr11:69823121<br>-69837784   | 1.2  | 4.9   | 3.2 | $3.0 \times 10^{-2}$ |
| Pac spc | ENSMUSG00<br>000027340.11 | <i>Slc23a2</i>  | chr2:132052495<br>-132220250  | 1.5  | 6.0   | 3.2 | $3.8 \times 10^{-2}$ |
| Pac spc | ENSMUSG00<br>000054321.6  | <i>Taf4b</i>    | chr18:14783244<br>-14900359   | 3.5  | 12.4  | 3.2 | $1.4 \times 10^{-2}$ |
| Pac spc | ENSMUSG00<br>000027932.10 | <i>Slc27a3</i>  | chr3:90385238-<br>90389938    | 0.6  | 3.0   | 3.2 | $4.1 \times 10^{-2}$ |
| Pac spc | ENSMUSG00<br>000034902.13 | <i>Pip5k1c</i>  | chr10:81292962<br>-81319973   | 5.5  | 18.8  | 3.2 | $1.8 \times 10^{-2}$ |
| Pac spc | ENSMUSG00<br>000028661.8  | <i>Epha8</i>    | chr4:136929418<br>-136956816  | 0.3  | 2.1   | 3.2 | $2.9 \times 10^{-2}$ |
| Pac spc | ENSMUSG00<br>000005373.9  | <i>Mlxipl</i>   | chr5:135106890<br>-135138382  | 0.3  | 2.1   | 3.2 | $3.3 \times 10^{-2}$ |
| Pac spc | ENSMUSG00<br>000048897.11 | <i>Zfp710</i>   | chr7:80024813-<br>80092751    | 0.4  | 2.5   | 3.2 | $5.0 \times 10^{-2}$ |
| Pac spc | ENSMUSG00<br>000024457.12 | <i>Trim26</i>   | chr17:36837133<br>-36859398   | 1.7  | 6.4   | 3.2 | $3.7 \times 10^{-2}$ |
| Pac spc | ENSMUSG00<br>000068876.10 | <i>Cgn</i>      | chr3:94760068-<br>94786492    | 0.9  | 3.9   | 3.2 | $4.8 \times 10^{-2}$ |
| Pac spc | ENSMUSG00<br>000030309.12 | <i>Caprin2</i>  | chr6:148842491<br>-148896237  | 12.0 | 39.5  | 3.2 | $4.1 \times 10^{-2}$ |
| Pac spc | ENSMUSG00<br>000020092.8  | <i>Pald1</i>    | chr10:61319656<br>-61383523   | 0.1  | 1.5   | 3.2 | $4.7 \times 10^{-2}$ |
| Pac spc | ENSMUSG00<br>000010592.8  | <i>Dazl</i>     | chr17:50279393<br>-50293599   | 50.8 | 162.9 | 3.2 | $4.3 \times 10^{-3}$ |
| Pac spc | ENSMUSG00<br>000032902.1  | <i>Slc16a1</i>  | chr3:104638667<br>-104658462  | 4.3  | 14.7  | 3.2 | $1.6 \times 10^{-2}$ |
| Pac spc | ENSMUSG00<br>000040249.11 | <i>Lrp1</i>     | chr10:12753816<br>0-127621148 | 0.2  | 1.8   | 3.2 | $1.1 \times 10^{-2}$ |
| Pac spc | ENSMUSG00<br>000021294.7  | <i>Kif26a</i>   | chr12:11214620<br>7-112181747 | 0.4  | 2.2   | 3.2 | $3.1 \times 10^{-2}$ |

|         |                           |                 |                               |      |      |     |                      |
|---------|---------------------------|-----------------|-------------------------------|------|------|-----|----------------------|
| Pac spc | ENSMUSG00<br>000049699.3  | <i>Ucn2</i>     | chr9:108986162<br>-108987164  | 0.0  | 1.1  | 3.2 | $4.3 \times 10^{-3}$ |
| Pac spc | ENSMUSG00<br>000034218.11 | <i>Atm</i>      | chr9:53439148-<br>53536740    | 3.5  | 12.3 | 3.2 | $2.2 \times 10^{-2}$ |
| Pac spc | ENSMUSG00<br>000055491.9  | <i>Pprc1</i>    | chr19:46032592<br>-46072915   | 9.5  | 31.1 | 3.2 | $3.3 \times 10^{-2}$ |
| Pac spc | ENSMUSG00<br>000005034.11 | <i>Prkacb</i>   | chr3:146729578<br>-146812960  | 3.0  | 10.5 | 3.1 | $1.9 \times 10^{-2}$ |
| Pac spc | ENSMUSG00<br>000017550.10 | <i>Atad5</i>    | chr11:80089399<br>-80135794   | 1.3  | 5.1  | 3.1 | $4.8 \times 10^{-2}$ |
| Pac spc | ENSMUSG00<br>000019877.6  | <i>Serinc1</i>  | chr10:57515773<br>-57532530   | 10.2 | 32.9 | 3.1 | $4.8 \times 10^{-2}$ |
| Pac spc | ENSMUSG00<br>000026478.10 | <i>Lamc1</i>    | chr1:153218921<br>-153332786  | 0.2  | 1.7  | 3.1 | $1.1 \times 10^{-2}$ |
| Pac spc | ENSMUSG00<br>000095123.1  | <i>Gm21781</i>  | chr10:4391586-<br>4396424     | 1.6  | 5.9  | 3.1 | $4.3 \times 10^{-2}$ |
| Pac spc | ENSMUSG00<br>000041351.12 | <i>Rap1gap</i>  | chr4:137664725<br>-137729861  | 2.7  | 9.4  | 3.1 | $4.0 \times 10^{-2}$ |
| Pac spc | ENSMUSG00<br>000019179.6  | <i>Mdh2</i>     | chr5:135778479<br>-135790398  | 16.4 | 52.0 | 3.1 | $1.9 \times 10^{-2}$ |
| Pac spc | ENSMUSG00<br>000071076.5  | <i>Jund</i>     | chr8:70697738-<br>70700616    | 4.3  | 14.4 | 3.1 | $2.6 \times 10^{-2}$ |
| Pac spc | ENSMUSG00<br>000033352.7  | <i>Map2k4</i>   | chr11:65688242<br>-65788297   | 0.9  | 4.0  | 3.1 | $2.8 \times 10^{-2}$ |
| Pac spc | ENSMUSG00<br>000000184.9  | <i>Ccnd2</i>    | chr6:127125778<br>-127212411  | 0.3  | 2.0  | 3.1 | $3.0 \times 10^{-2}$ |
| Pac spc | ENSMUSG00<br>000034903.14 | <i>Cobll1</i>   | chr2:65088338-<br>65239675    | 0.2  | 1.7  | 3.1 | $1.1 \times 10^{-2}$ |
| Pac spc | ENSMUSG00<br>000034762.5  | <i>Glis1</i>    | chr4:107434571<br>-107635061  | 0.5  | 2.6  | 3.1 | $4.1 \times 10^{-2}$ |
| Pac spc | ENSMUSG00<br>000024151.9  | <i>Msh2</i>     | chr17:87672329<br>-87723713   | 3.4  | 11.6 | 3.1 | $3.3 \times 10^{-2}$ |
| Pac spc | ENSMUSG00<br>000033059.7  | <i>Pygb</i>     | chr2:150786734<br>-150831758  | 1.6  | 6.0  | 3.1 | $3.8 \times 10^{-2}$ |
| Pac spc | ENSMUSG00<br>000032898.6  | <i>Fbxo21</i>   | chr5:117976769<br>-118010191  | 4.5  | 14.7 | 3.0 | $1.6 \times 10^{-2}$ |
| Pac spc | ENSMUSG00<br>000028030.8  | <i>Tbck</i>     | chr3:132684143<br>-132838506  | 1.7  | 6.1  | 3.0 | $5.0 \times 10^{-2}$ |
| Pac spc | ENSMUSG00<br>000020782.14 | <i>Llgl2</i>    | chr11:11582404<br>8-115855780 | 1.6  | 5.8  | 3.0 | $4.5 \times 10^{-2}$ |
| Pac spc | ENSMUSG00<br>000004113.14 | <i>Cacna1b</i>  | chr2:24603886-<br>24763152    | 0.9  | 3.6  | 3.0 | $3.6 \times 10^{-2}$ |
| Pac spc | ENSMUSG00<br>000057672.11 | <i>Pkn1</i>     | chr8:83666832-<br>83699179    | 1.9  | 6.8  | 3.0 | $4.0 \times 10^{-2}$ |
| Pac spc | ENSMUSG00<br>000026238.10 | <i>Ptma</i>     | chr1:86526725-<br>86530712    | 18.8 | 57.0 | 3.0 | $4.0 \times 10^{-2}$ |
| Pac spc | ENSMUSG00<br>000022791.12 | <i>Tnk2</i>     | chr16:32643873<br>-32683493   | 3.0  | 9.9  | 3.0 | $2.9 \times 10^{-2}$ |
| Pac spc | ENSMUSG00<br>000015647.9  | <i>Lama5</i>    | chr2:180176372<br>-180225859  | 1.6  | 5.7  | 3.0 | $2.4 \times 10^{-2}$ |
| Pac spc | ENSMUSG00<br>000031657.12 | <i>Heatr3</i>   | chr8:88137854-<br>88172027    | 5.4  | 17.1 | 3.0 | $4.4 \times 10^{-2}$ |
| Pac spc | ENSMUSG00<br>000034282.3  | <i>Evpl</i>     | chr11:11622055<br>8-116238077 | 0.3  | 1.9  | 3.0 | $4.8 \times 10^{-2}$ |
| Pac spc | ENSMUSG00<br>000070570.4  | <i>Slc17a7</i>  | chr7:45163920-<br>45176138    | 1.0  | 3.9  | 3.0 | $3.8 \times 10^{-2}$ |
| Pac spc | ENSMUSG00<br>000052298.8  | <i>Cdc42se2</i> | chr11:54717455<br>-54787675   | 11.9 | 36.2 | 3.0 | $1.1 \times 10^{-2}$ |

|         |                           |                           |                               |      |      |     |                      |
|---------|---------------------------|---------------------------|-------------------------------|------|------|-----|----------------------|
| Pac spc | ENSMUSG00<br>000072825.6  | <i>Cep170b</i>            | chr12:11272217<br>3-112746591 | 1.1  | 4.1  | 2.9 | $2.3 \times 10^{-2}$ |
| Pac spc | ENSMUSG00<br>000032547.8  | <i>Ryk</i>                | chr9:102834916<br>-102908305  | 4.4  | 13.8 | 2.9 | $4.5 \times 10^{-2}$ |
| Pac spc | ENSMUSG00<br>000024098.5  | <i>Twsg1</i>              | chr17:65923065<br>-65951187   | 3.3  | 10.7 | 2.9 | $4.7 \times 10^{-2}$ |
| Pac spc | ENSMUSG00<br>000021910.11 | <i>Nisch</i>              | chr14:31170929<br>-31216946   | 14.0 | 41.8 | 2.9 | $4.3 \times 10^{-3}$ |
| Pac spc | ENSMUSG00<br>000009035.9  | <i>Tmem184<br/>b</i>      | chr15:79360683<br>-79403303   | 1.6  | 5.6  | 2.9 | $3.6 \times 10^{-2}$ |
| Pac spc | ENSMUSG00<br>000023977.10 | <i>Ubr2</i>               | chr17:46928291<br>-47010532   | 3.3  | 10.7 | 2.9 | $2.1 \times 10^{-2}$ |
| Pac spc | ENSMUSG00<br>000021611.8  | <i>Tert</i>               | chr13:73627000<br>-73649041   | 0.4  | 2.0  | 2.9 | $4.4 \times 10^{-2}$ |
| Pac spc | ENSMUSG00<br>000067336.6  | <i>Bmpr2</i>              | chr1:59763399-<br>59879014    | 1.0  | 3.9  | 2.9 | $1.3 \times 10^{-2}$ |
| Pac spc | ENSMUSG00<br>000007817.10 | <i>Zmiz1</i>              | chr14:25455736<br>-25666743   | 0.3  | 1.9  | 2.9 | $3.3 \times 10^{-2}$ |
| Pac spc | ENSMUSG00<br>000036046.10 | <i>5031439G<br/>07Rik</i> | chr15:84943935<br>-84988551   | 1.4  | 5.0  | 2.9 | $4.8 \times 10^{-2}$ |
| Pac spc | ENSMUSG00<br>000032849.9  | <i>Abcc4</i>              | chr14:11848269<br>1-118706219 | 0.3  | 1.8  | 2.8 | $3.7 \times 10^{-2}$ |
| Pac spc | ENSMUSG00<br>000007564.10 | <i>Ppp2r1a</i>            | chr17:20945310<br>-20965916   | 9.4  | 27.3 | 2.8 | $2.7 \times 10^{-2}$ |
| Pac spc | ENSMUSG00<br>000056724.10 | <i>Nbeal2</i>             | chr9:110624788<br>-110654161  | 1.2  | 4.2  | 2.8 | $4.2 \times 10^{-2}$ |
| Pac spc | ENSMUSG00<br>000029863.9  | <i>Casp2</i>              | chr6:42264984-<br>42282508    | 7.9  | 23.0 | 2.8 | $2.9 \times 10^{-2}$ |
| Pac spc | ENSMUSG00<br>000027646.11 | <i>Src</i>                | chr2:157418443<br>-157471862  | 1.0  | 3.8  | 2.8 | $4.8 \times 10^{-2}$ |
| Pac spc | ENSMUSG00<br>000042978.9  | <i>Sbk1</i>               | chr7:126272618<br>-126294999  | 3.4  | 10.3 | 2.8 | $2.6 \times 10^{-2}$ |
| Pac spc | ENSMUSG00<br>000053617.7  | <i>Sh3pxd2a</i>           | chr19:47260173<br>-47464411   | 0.6  | 2.5  | 2.8 | $1.5 \times 10^{-2}$ |
| Pac spc | ENSMUSG00<br>000033624.6  | <i>Pdpr</i>               | chr8:111094629<br>-111145480  | 5.8  | 17.0 | 2.8 | $1.7 \times 10^{-2}$ |
| Pac spc | ENSMUSG00<br>000035898.9  | <i>Uba6</i>               | chr5:86110719-<br>86172803    | 9.6  | 27.3 | 2.7 | $3.8 \times 10^{-2}$ |
| Pac spc | ENSMUSG00<br>000042700.11 | <i>Sipa11i</i>            | chr12:82170015<br>-82451782   | 5.1  | 15.0 | 2.7 | $1.8 \times 10^{-2}$ |
| Pac spc | ENSMUSG00<br>000063455.12 | <i>D630045J<br/>12Rik</i> | chr6:38048482-<br>38254009    | 2.0  | 6.2  | 2.7 | $4.5 \times 10^{-2}$ |
| Pac spc | ENSMUSG00<br>000033228.7  | <i>Scaf11</i>             | chr15:96411697<br>-96460843   | 3.0  | 8.9  | 2.7 | $4.0 \times 10^{-2}$ |
| Pac spc | ENSMUSG00<br>000003812.9  | <i>Dnase2a</i>            | chr8:84908559-<br>84937359    | 0.1  | 1.1  | 2.7 | $4.0 \times 10^{-2}$ |
| Pac spc | ENSMUSG00<br>000037410.9  | <i>Tbc1d2b</i>            | chr9:90163068-<br>90270804    | 0.8  | 2.9  | 2.7 | $4.5 \times 10^{-2}$ |
| Pac spc | ENSMUSG00<br>000005802.8  | <i>Slc30a4</i>            | chr2:122681232<br>-122721456  | 4.2  | 12.3 | 2.7 | $4.2 \times 10^{-2}$ |
| Pac spc | ENSMUSG00<br>000061313.7  | <i>Ddhd2</i>              | chr8:25725323-<br>25754280    | 4.4  | 12.7 | 2.7 | $3.6 \times 10^{-2}$ |
| Pac spc | ENSMUSG00<br>000028961.11 | <i>Pgd</i>                | chr4:149149990<br>-149166771  | 10.9 | 29.7 | 2.7 | $3.2 \times 10^{-2}$ |
| Pac spc | ENSMUSG00<br>000005410.5  | <i>Mcm5</i>               | chr8:75109527-<br>75128439    | 9.7  | 26.4 | 2.6 | $3.8 \times 10^{-2}$ |
| Pac spc | ENSMUSG00<br>000053198.9  | <i>Prx</i>                | chr7:27499323-<br>27520214    | 0.1  | 1.1  | 2.6 | $4.9 \times 10^{-2}$ |

|         |                           |                           |                               |        |       |     |                      |
|---------|---------------------------|---------------------------|-------------------------------|--------|-------|-----|----------------------|
| Pac spc | ENSMUSG00<br>000056938.12 | <i>Acbd4</i>              | chr11:10310168<br>1-103112200 | 0.1    | 1.0   | 2.6 | $4.3 \times 10^{-3}$ |
| Pac spc | ENSMUSG00<br>000037815.6  | <i>Ctnna1</i>             | chr18:35118887<br>-35254773   | 4.2    | 11.8  | 2.6 | $4.5 \times 10^{-2}$ |
| Pac spc | ENSMUSG00<br>000052085.6  | <i>Dock8</i>              | chr19:24999528<br>-25202432   | 0.2    | 1.2   | 2.6 | $1.7 \times 10^{-2}$ |
| Pac spc | ENSMUSG00<br>000018846.8  | <i>Pank3</i>              | chr11:35769483<br>-35791285   | 4.6    | 12.8  | 2.6 | $3.1 \times 10^{-2}$ |
| Pac spc | ENSMUSG00<br>000014602.11 | <i>Kif1a</i>              | chr1:93015463-<br>93101951    | 0.3    | 1.4   | 2.6 | $3.6 \times 10^{-2}$ |
| Pac spc | ENSMUSG00<br>000027312.10 | <i>Atrn</i>               | chr2:130906494<br>-131030333  | 6.9    | 18.4  | 2.5 | $4.1 \times 10^{-2}$ |
| Pac spc | ENSMUSG00<br>000009995.13 | <i>Taz</i>                | chrX:74273216-<br>74290151    | 0.5    | 1.9   | 2.5 | $2.8 \times 10^{-2}$ |
| Pac spc | ENSMUSG00<br>000075470.1  | <i>Alg10b</i>             | chr15:90224310<br>-90230554   | 6.6    | 17.6  | 2.5 | $2.9 \times 10^{-2}$ |
| Pac spc | ENSMUSG00<br>000033948.3  | <i>Zswim5</i>             | chr4:116877375<br>-116989264  | 3.8    | 10.4  | 2.5 | $1.8 \times 10^{-2}$ |
| Pac spc | ENSMUSG00<br>000032340.7  | <i>Neo1</i>               | chr9:58874678-<br>59036441    | 4.1    | 11.0  | 2.5 | $3.5 \times 10^{-2}$ |
| Pac spc | ENSMUSG00<br>000003316.10 | <i>Glg1</i>               | chr8:111154420<br>-111259216  | 11.4   | 29.1  | 2.5 | $3.1 \times 10^{-2}$ |
| Pac spc | ENSMUSG00<br>000033767.10 | <i>D930015E<br/>06Rik</i> | chr3:83897654-<br>84040175    | 7.9    | 20.0  | 2.4 | $4.7 \times 10^{-2}$ |
| Pac spc | ENSMUSG00<br>000041859.10 | <i>Mcm3</i>               | chr1:20802967-<br>20820312    | 11.1   | 27.4  | 2.4 | $5.0 \times 10^{-2}$ |
| Pac spc | ENSMUSG00<br>000062296.4  | <i>Trank1</i>             | chr9:111311738<br>-111395774  | 3.1    | 8.2   | 2.4 | $4.0 \times 10^{-2}$ |
| Pac spc | ENSMUSG00<br>000033253.14 | <i>Szt2</i>               | chr4:118359989<br>-118409273  | 8.7    | 20.9  | 2.3 | $4.0 \times 10^{-2}$ |
| Pac spc | ENSMUSG00<br>000038644.10 | <i>Pold1</i>              | chr7:44532745-<br>44548849    | 22.1   | 51.8  | 2.3 | $4.3 \times 10^{-2}$ |
| Pac spc | ENSMUSG00<br>000063146.7  | <i>Clip2</i>              | chr5:134489385<br>-134552434  | 0.2    | 1.2   | 2.3 | $4.2 \times 10^{-2}$ |
| Pac spc | ENSMUSG00<br>000032267.7  | <i>Usp28</i>              | chr9:48985384-<br>49042517    | 6.9    | 16.3  | 2.3 | $4.2 \times 10^{-2}$ |
| Pac spc | ENSMUSG00<br>000050310.8  | <i>Rictor</i>             | chr15:6708380-<br>6800398     | 8.2    | 19.2  | 2.3 | $4.3 \times 10^{-2}$ |
| Pac spc | ENSMUSG00<br>000027878.10 | <i>Notch2</i>             | chr3:98013537-<br>98150367    | 3.4    | 8.3   | 2.2 | $3.6 \times 10^{-2}$ |
| Pac spc | ENSMUSG00<br>000029512.7  | <i>Ulk1</i>               | chr5:110784487<br>-110810097  | 7.0    | 15.9  | 2.2 | $4.3 \times 10^{-2}$ |
| Pac spc | ENSMUSG00<br>000005469.9  | <i>Prkaca</i>             | chr8:83972977-<br>83996445    | 55.2   | 25.9  | 0.5 | $4.4 \times 10^{-2}$ |
| Pac spc | ENSMUSG00<br>000030086.12 | <i>Chchd6</i>             | chr6:89383145-<br>89595652    | 157.2  | 74.1  | 0.5 | $4.8 \times 10^{-2}$ |
| Pac spc | ENSMUSG00<br>000032396.13 | <i>Dis3l</i>              | chr9:64306755-<br>64341288    | 162.8  | 76.5  | 0.5 | $4.8 \times 10^{-2}$ |
| Pac spc | ENSMUSG00<br>000028937.10 | <i>Acot7</i>              | chr4:152178133<br>-152271855  | 332.0  | 154.5 | 0.5 | $4.9 \times 10^{-2}$ |
| Pac spc | ENSMUSG00<br>000021771.9  | <i>Vdac2</i>              | chr14:21831268<br>-21856926   | 249.6  | 115.8 | 0.5 | $4.7 \times 10^{-2}$ |
| Pac spc | ENSMUSG00<br>000024897.8  | <i>Apba1</i>              | chr19:23758875<br>-23949597   | 58.8   | 27.0  | 0.5 | $3.3 \times 10^{-2}$ |
| Pac spc | ENSMUSG00<br>000036211.3  | <i>Hist1h1t</i>           | chr13:23695813<br>-23696542   | 1424.2 | 658.2 | 0.5 | $3.8 \times 10^{-2}$ |
| Pac spc | ENSMUSG00<br>000040548.11 | <i>Tex2</i>               | chr11:10650214<br>6-106613423 | 125.0  | 56.6  | 0.5 | $3.8 \times 10^{-2}$ |

|         |                           |                           |                               |       |       |     |                      |
|---------|---------------------------|---------------------------|-------------------------------|-------|-------|-----|----------------------|
| Pac spc | ENSMUSG00<br>000000552.9  | <i>Zfp385a</i>            | chr15:10331389<br>4-103340086 | 77.0  | 34.7  | 0.5 | $3.8 \times 10^{-2}$ |
| Pac spc | ENSMUSG00<br>000074734.2  | <i>4933416C<br/>03Rik</i> | chr10:11601821<br>2-116274932 | 129.5 | 58.4  | 0.5 | $4.8 \times 10^{-2}$ |
| Pac spc | ENSMUSG00<br>000022622.4  | <i>Acr</i>                | chr15:89568325<br>-89574585   | 125.8 | 56.7  | 0.5 | $4.0 \times 10^{-2}$ |
| Pac spc | ENSMUSG00<br>000030357.6  | <i>Fkbp4</i>              | chr6:128429734<br>-128438677  | 229.3 | 102.8 | 0.4 | $3.6 \times 10^{-2}$ |
| Pac spc | ENSMUSG00<br>000058297.12 | <i>Spock2</i>             | chr10:60106218<br>-60135198   | 29.4  | 12.9  | 0.4 | $4.0 \times 10^{-2}$ |
| Pac spc | ENSMUSG00<br>000020078.11 | <i>Vps26a</i>             | chr10:62454842<br>-62486805   | 97.4  | 43.4  | 0.4 | $4.2 \times 10^{-2}$ |
| Pac spc | ENSMUSG00<br>000022092.10 | <i>Ppp3cc</i>             | chr14:70217897<br>-70289449   | 89.0  | 39.5  | 0.4 | $3.5 \times 10^{-2}$ |
| Pac spc | ENSMUSG00<br>000023456.10 | <i>Tpi1</i>               | chr6:124808660<br>-124814296  | 100.4 | 44.4  | 0.4 | $3.9 \times 10^{-2}$ |
| Pac spc | ENSMUSG00<br>000034274.7  | <i>Thoc5</i>              | chr11:4895319-<br>4928867     | 62.8  | 27.5  | 0.4 | $4.0 \times 10^{-2}$ |
| Pac spc | ENSMUSG00<br>000033213.12 | <i>AA467197</i>           | chr2:122636985<br>-122641191  | 367.2 | 162.0 | 0.4 | $4.0 \times 10^{-2}$ |
| Pac spc | ENSMUSG00<br>000031554.13 | <i>Adam5</i>              | chr8:24727092-<br>24824369    | 289.5 | 126.8 | 0.4 | $3.5 \times 10^{-2}$ |
| Pac spc | ENSMUSG00<br>000026163.13 | <i>Sphkap</i>             | chr1:83254138-<br>83408200    | 27.9  | 12.0  | 0.4 | $4.0 \times 10^{-2}$ |
| Pac spc | ENSMUSG00<br>000063229.10 | <i>Ldha</i>               | chr7:46841474-<br>46855627    | 571.8 | 250.6 | 0.4 | $4.0 \times 10^{-2}$ |
| Pac spc | ENSMUSG00<br>000036196.11 | <i>Slc26a8</i>            | chr17:28637782<br>-28689987   | 55.6  | 24.0  | 0.4 | $3.8 \times 10^{-2}$ |
| Pac spc | ENSMUSG00<br>000025171.1  | <i>Ubtd1</i>              | chr19:41981762<br>-42034641   | 75.8  | 32.8  | 0.4 | $4.4 \times 10^{-2}$ |
| Pac spc | ENSMUSG00<br>000040734.10 | <i>Ppp1r13l</i>           | chr7:19359748-<br>19378533    | 64.3  | 27.7  | 0.4 | $4.3 \times 10^{-2}$ |
| Pac spc | ENSMUSG00<br>000072295.5  | <i>Als2cr11</i>           | chr1:59014223-<br>59094900    | 151.0 | 65.0  | 0.4 | $4.4 \times 10^{-2}$ |
| Pac spc | ENSMUSG00<br>000025509.11 | <i>Pnpla2</i>             | chr7:141455197<br>-141460743  | 164.1 | 70.6  | 0.4 | $4.0 \times 10^{-2}$ |
| Pac spc | ENSMUSG00<br>000022246.9  | <i>Rai14</i>              | chr15:10568978<br>-10714631   | 87.2  | 37.3  | 0.4 | $3.1 \times 10^{-2}$ |
| Pac spc | ENSMUSG00<br>000045466.14 | <i>Zfp956</i>             | chr6:47943170-<br>47965300    | 78.6  | 33.5  | 0.4 | $4.2 \times 10^{-2}$ |
| Pac spc | ENSMUSG00<br>000051768.8  | <i>Xrcc1</i>              | chr7:24547149-<br>24573438    | 54.9  | 23.1  | 0.4 | $4.2 \times 10^{-2}$ |
| Pac spc | ENSMUSG00<br>000024206.10 | <i>Rfx2</i>               | chr17:56775896<br>-56831008   | 182.8 | 77.6  | 0.4 | $3.8 \times 10^{-2}$ |
| Pac spc | ENSMUSG00<br>000039183.5  | <i>Nubp2</i>              | chr17:24882610<br>-24886350   | 126.2 | 53.4  | 0.4 | $3.9 \times 10^{-2}$ |
| Pac spc | ENSMUSG00<br>000075706.6  | <i>Gpx4</i>               | chr10:80047165<br>-80056439   | 509.6 | 216.5 | 0.4 | $3.5 \times 10^{-2}$ |
| Pac spc | ENSMUSG00<br>000029131.10 | <i>Dnajb6</i>             | chr5:29735636-<br>29786478    | 150.3 | 63.3  | 0.4 | $3.9 \times 10^{-2}$ |
| Pac spc | ENSMUSG00<br>000017843.9  | <i>Ppp2r5c</i>            | chr12:11048573<br>8-110583061 | 117.1 | 49.2  | 0.4 | $2.5 \times 10^{-2}$ |
| Pac spc | ENSMUSG00<br>000028878.7  | <i>Fam76a</i>             | chr4:132899212<br>-132922558  | 33.4  | 13.7  | 0.4 | $4.8 \times 10^{-2}$ |
| Pac spc | ENSMUSG00<br>000049792.6  | <i>Bag5</i>               | chr12:11170948<br>7-111713257 | 114.8 | 47.9  | 0.4 | $2.6 \times 10^{-2}$ |
| Pac spc | ENSMUSG00<br>000039936.14 | <i>Pik3cd</i>             | chr4:149649167<br>-149702571  | 16.8  | 6.8   | 0.4 | $4.0 \times 10^{-2}$ |

|         |                       |                 |                           |       |       |     |                      |
|---------|-----------------------|-----------------|---------------------------|-------|-------|-----|----------------------|
| Pac spc | ENSMUSG0000035211.8   | <i>Xrra1</i>    | chr7:99859217-99917824    | 82.9  | 34.4  | 0.4 | $4.0 \times 10^{-2}$ |
| Pac spc | ENSMUSG0000042246.4   | <i>Tmc7</i>     | chr7:118535842-118584736  | 16.6  | 6.6   | 0.4 | $4.9 \times 10^{-2}$ |
| Pac spc | ENSMUSG0000002102.11  | <i>Psmc3</i>    | chr2:91054008-91070417    | 344.2 | 142.9 | 0.4 | $3.5 \times 10^{-2}$ |
| Pac spc | ENSMUSG00000027550.10 | <i>Lrrcc1</i>   | chr3:14533787-14572658    | 76.1  | 31.3  | 0.4 | $2.5 \times 10^{-2}$ |
| Pac spc | ENSMUSG00000024154.6  | <i>Gtf2a1l</i>  | chr17:88668659-88715152   | 119.6 | 49.4  | 0.4 | $3.3 \times 10^{-2}$ |
| Pac spc | ENSMUSG0000056665.2   | <i>Them6</i>    | chr15:74721203-74728034   | 52.6  | 21.5  | 0.4 | $3.4 \times 10^{-2}$ |
| Pac spc | ENSMUSG0000033210.12  | <i>Slc9c1</i>   | chr16:45535308-45607001   | 40.4  | 16.4  | 0.4 | $3.6 \times 10^{-2}$ |
| Pac spc | ENSMUSG0000045107.4   | <i>Saysd1</i>   | chr14:20075645-20083172   | 49.4  | 20.1  | 0.4 | $3.8 \times 10^{-2}$ |
| Pac spc | ENSMUSG0000013822.6   | <i>Elof1</i>    | chr9:22112988-22117148    | 314.9 | 129.8 | 0.4 | $3.8 \times 10^{-2}$ |
| Pac spc | ENSMUSG0000020520.10  | <i>Galnt10</i>  | chr11:57623697-57787514   | 25.1  | 10.1  | 0.4 | $2.3 \times 10^{-2}$ |
| Pac spc | ENSMUSG0000027363.11  | <i>Usp8</i>     | chr2:126707327-126783458  | 111.1 | 45.5  | 0.4 | $2.6 \times 10^{-2}$ |
| Pac spc | ENSMUSG0000024474.5   | <i>Ik</i>       | chr18:36744655-36757639   | 120.9 | 49.4  | 0.4 | $1.8 \times 10^{-2}$ |
| Pac spc | ENSMUSG0000025035.8   | <i>Arl3</i>     | chr19:46531108-46573085   | 184.1 | 75.4  | 0.4 | $3.1 \times 10^{-2}$ |
| Pac spc | ENSMUSG0000035890.8   | <i>Rnf126</i>   | chr10:79758514-79766952   | 266.5 | 109.1 | 0.4 | $2.3 \times 10^{-2}$ |
| Pac spc | ENSMUSG0000020472.10  | <i>Zkscan17</i> | chr11:59485519-59526751   | 62.4  | 25.3  | 0.4 | $4.9 \times 10^{-2}$ |
| Pac spc | ENSMUSG0000053624.3   | <i>Gykl1</i>    | chr18:52693678-52695668   | 118.9 | 48.2  | 0.4 | $2.6 \times 10^{-2}$ |
| Pac spc | ENSMUSG0000027378.12  | <i>Nphp1</i>    | chr2:127740731-127788897  | 348.5 | 141.4 | 0.4 | $2.5 \times 10^{-2}$ |
| Pac spc | ENSMUSG0000025793.11  | <i>Hgs</i>      | chr11:120467634-120483984 | 99.1  | 40.0  | 0.4 | $4.9 \times 10^{-2}$ |
| Pac spc | ENSMUSG0000022013.3   | <i>Dnajc15</i>  | chr14:77826216-77874917   | 151.1 | 61.0  | 0.4 | $3.9 \times 10^{-2}$ |
| Pac spc | ENSMUSG0000062732.6   | <i>Lypd4</i>    | chr7:24864619-24869941    | 210.4 | 85.0  | 0.4 | $2.2 \times 10^{-2}$ |
| Pac spc | ENSMUSG0000058741.3   | <i>Prr19</i>    | chr7:25301358-25304133    | 55.7  | 22.3  | 0.4 | $2.5 \times 10^{-2}$ |
| Pac spc | ENSMUSG0000039886.4   | <i>Tmem120a</i> | chr5:135735484-135744271  | 92.6  | 37.2  | 0.4 | $2.9 \times 10^{-2}$ |
| Pac spc | ENSMUSG0000040097.11  | <i>Flywch1</i>  | chr17:23755422-23771591   | 119.6 | 48.1  | 0.4 | $2.4 \times 10^{-2}$ |
| Pac spc | ENSMUSG0000025218.6   | <i>Poll</i>     | chr19:45552274-45560531   | 44.5  | 17.7  | 0.4 | $2.9 \times 10^{-2}$ |
| Pac spc | ENSMUSG0000035560.4   | <i>Wdr20rt</i>  | chr12:65225516-65228454   | 60.9  | 24.3  | 0.4 | $2.0 \times 10^{-2}$ |
| Pac spc | ENSMUSG0000084883.1   | <i>Ccdc85c</i>  | chr12:108206344-108275417 | 19.4  | 7.5   | 0.4 | $3.2 \times 10^{-2}$ |
| Pac spc | ENSMUSG0000042156.11  | <i>Dzip1</i>    | chr14:118875519-118925314 | 37.5  | 14.8  | 0.4 | $1.7 \times 10^{-2}$ |
| Pac spc | ENSMUSG0000019834.11  | <i>Slc22a16</i> | chr10:40570335-40604132   | 96.9  | 38.7  | 0.4 | $2.6 \times 10^{-2}$ |
| Pac spc | ENSMUSG0000030096.7   | <i>Slc6a6</i>   | chr6:91684066-91759063    | 6.0   | 2.1   | 0.4 | $4.8 \times 10^{-2}$ |

|         |                           |                           |                               |       |       |     |                      |
|---------|---------------------------|---------------------------|-------------------------------|-------|-------|-----|----------------------|
| Pac spc | ENSMUSG00<br>000045211.4  | <i>Nudt18</i>             | chr14:70577846<br>-70582571   | 54.4  | 21.6  | 0.4 | $1.8 \times 10^{-2}$ |
| Pac spc | ENSMUSG00<br>000025337.6  | <i>Sbds</i>               | chr5:130245730<br>-130255530  | 66.6  | 26.4  | 0.4 | $4.8 \times 10^{-2}$ |
| Pac spc | ENSMUSG00<br>000029310.9  | <i>Nudt9</i>              | chr5:104046305<br>-104065379  | 42.8  | 16.9  | 0.4 | $2.9 \times 10^{-2}$ |
| Pac spc | ENSMUSG00<br>000016982.6  | <i>Pom121l2</i>           | chr13:21981193<br>-21988734   | 150.6 | 60.0  | 0.4 | $2.6 \times 10^{-2}$ |
| Pac spc | ENSMUSG00<br>000026331.9  | <i>Slco6c1</i>            | chr1:97059037-<br>97128301    | 91.6  | 36.3  | 0.4 | $3.2 \times 10^{-2}$ |
| Pac spc | ENSMUSG00<br>000027702.7  | <i>Lrrc34</i>             | chr3:30624266-<br>30672431    | 77.7  | 30.8  | 0.4 | $4.8 \times 10^{-2}$ |
| Pac spc | ENSMUSG00<br>000030216.10 | <i>Wbp11</i>              | chr6:136813653<br>-136828233  | 303.5 | 121.1 | 0.4 | $2.5 \times 10^{-2}$ |
| Pac spc | ENSMUSG00<br>000058709.7  | <i>Egln2</i>              | chr7:27153713-<br>27166802    | 263.5 | 105.0 | 0.4 | $3.3 \times 10^{-2}$ |
| Pac spc | ENSMUSG00<br>000031553.11 | <i>Adam3</i>              | chr8:24677224-<br>24725852    | 182.1 | 72.4  | 0.4 | $3.1 \times 10^{-2}$ |
| Pac spc | ENSMUSG00<br>000069805.6  | <i>Fbp1</i>               | chr13:62864752<br>-62888282   | 387.3 | 153.8 | 0.4 | $1.9 \times 10^{-2}$ |
| Pac spc | ENSMUSG00<br>000050035.6  | <i>Fhl4</i>               | chr10:85097018<br>-85102495   | 573.4 | 226.2 | 0.4 | $1.5 \times 10^{-2}$ |
| Pac spc | ENSMUSG00<br>000074749.6  | <i>Kiz</i>                | chr2:146855863<br>-146970097  | 100.3 | 39.3  | 0.4 | $1.4 \times 10^{-2}$ |
| Pac spc | ENSMUSG00<br>000070953.9  | <i>Rabepk</i>             | chr2:34777555-<br>34799912    | 66.4  | 25.9  | 0.4 | $4.9 \times 10^{-2}$ |
| Pac spc | ENSMUSG00<br>000025762.10 | <i>Larp1b</i>             | chr3:40950630-<br>41040234    | 194.3 | 76.4  | 0.4 | $1.9 \times 10^{-2}$ |
| Pac spc | ENSMUSG00<br>000024304.10 | <i>Cdh2</i>               | chr18:16588876<br>-16809246   | 25.9  | 9.9   | 0.4 | $3.5 \times 10^{-2}$ |
| Pac spc | ENSMUSG00<br>000029147.7  | <i>Ppm1g</i>              | chr5:31202667-<br>31220545    | 243.8 | 95.8  | 0.4 | $1.8 \times 10^{-2}$ |
| Pac spc | ENSMUSG00<br>000024158.13 | <i>Hagh</i>               | chr17:24840142<br>-24864450   | 183.5 | 71.7  | 0.4 | $3.1 \times 10^{-2}$ |
| Pac spc | ENSMUSG00<br>000024654.8  | <i>Asrgl1</i>             | chr19:9109867-<br>9279175     | 282.2 | 110.2 | 0.4 | $1.6 \times 10^{-2}$ |
| Pac spc | ENSMUSG00<br>000030792.7  | <i>Dkk1</i>               | chr7:45207524-<br>45211883    | 833.7 | 326.1 | 0.4 | $3.3 \times 10^{-2}$ |
| Pac spc | ENSMUSG00<br>000031631.11 | <i>Cfap97</i>             | chr8:46033260-<br>46195590    | 165.1 | 64.2  | 0.4 | $2.2 \times 10^{-2}$ |
| Pac spc | ENSMUSG00<br>000034932.4  | <i>Mrpl54</i>             | chr10:81264712<br>-81266934   | 103.2 | 39.9  | 0.4 | $3.9 \times 10^{-2}$ |
| Pac spc | ENSMUSG00<br>000019906.10 | <i>Lin7a</i>              | chr10:10727184<br>2-107425143 | 30.4  | 11.6  | 0.4 | $2.9 \times 10^{-2}$ |
| Pac spc | ENSMUSG00<br>000020462.10 | <i>Cfap36</i>             | chr11:29221531<br>-29247409   | 195.0 | 75.6  | 0.4 | $4.4 \times 10^{-2}$ |
| Pac spc | ENSMUSG00<br>000022671.8  | <i>Mzt2</i>               | chr16:15848440<br>-15863369   | 74.4  | 28.6  | 0.4 | $4.1 \times 10^{-2}$ |
| Pac spc | ENSMUSG00<br>000042797.8  | <i>Aqp11</i>              | chr7:97726378-<br>97738247    | 123.6 | 47.6  | 0.4 | $4.5 \times 10^{-2}$ |
| Pac spc | ENSMUSG00<br>000073730.2  | <i>4933415F<br/>23Rik</i> | chr1:23048294-<br>23235673    | 149.2 | 57.4  | 0.4 | $1.4 \times 10^{-2}$ |
| Pac spc | ENSMUSG00<br>000038026.8  | <i>Kcnj9</i>              | chr1:172320500<br>-172329318  | 29.9  | 11.2  | 0.4 | $3.9 \times 10^{-2}$ |
| Pac spc | ENSMUSG00<br>000032239.9  | <i>Rp9</i>                | chr9:22448310-<br>22468356    | 99.1  | 37.7  | 0.4 | $4.5 \times 10^{-2}$ |
| Pac spc | ENSMUSG00<br>000022085.3  | <i>Pebp4</i>              | chr14:69840419<br>-70059886   | 190.7 | 72.7  | 0.4 | $1.8 \times 10^{-2}$ |

|         |                           |                           |                              |       |       |     |                      |
|---------|---------------------------|---------------------------|------------------------------|-------|-------|-----|----------------------|
| Pac spc | ENSMUSG00<br>000032497.11 | <i>Lrrfip2</i>            | chr9:111118110<br>-111225668 | 30.9  | 11.5  | 0.4 | $2.9 \times 10^{-2}$ |
| Pac spc | ENSMUSG00<br>000055720.9  | <i>Ubl7</i>               | chr9:57910985-<br>57929968   | 171.4 | 65.2  | 0.4 | $1.1 \times 10^{-2}$ |
| Pac spc | ENSMUSG00<br>000033128.8  | <i>Gga1</i>               | chr15:78877189<br>-78894585  | 49.8  | 18.7  | 0.4 | $2.0 \times 10^{-2}$ |
| Pac spc | ENSMUSG00<br>000016626.8  | <i>Nlrp14</i>             | chr7:107166989<br>-107198102 | 73.3  | 27.6  | 0.4 | $3.9 \times 10^{-2}$ |
| Pac spc | ENSMUSG00<br>000019944.10 | <i>Rhobtb1</i>            | chr10:69151433<br>-69291791  | 15.7  | 5.7   | 0.4 | $4.4 \times 10^{-2}$ |
| Pac spc | ENSMUSG00<br>000020434.4  | <i>4921536K<br/>21Rik</i> | chr11:3886087-<br>3895098    | 72.1  | 26.9  | 0.4 | $1.1 \times 10^{-2}$ |
| Pac spc | ENSMUSG00<br>000027088.6  | <i>Phospho2</i>           | chr2:69789622-<br>69800005   | 177.7 | 66.6  | 0.4 | $2.6 \times 10^{-2}$ |
| Pac spc | ENSMUSG00<br>000053030.7  | <i>Spink2</i>             | chr5:77205106-<br>77211471   | 391.6 | 146.7 | 0.4 | $7.0 \times 10^{-3}$ |
| Pac spc | ENSMUSG00<br>000050623.4  | <i>Tex40</i>              | chr19:6922425-<br>6925380    | 236.1 | 88.2  | 0.4 | $1.7 \times 10^{-2}$ |
| Pac spc | ENSMUSG00<br>000001794.8  | <i>Capns1</i>             | chr7:30186941-<br>30195164   | 128.2 | 47.7  | 0.4 | $2.7 \times 10^{-2}$ |
| Pac spc | ENSMUSG00<br>000016526.8  | <i>Dyrk3</i>              | chr1:131127454<br>-131138340 | 36.5  | 13.3  | 0.4 | $1.8 \times 10^{-2}$ |
| Pac spc | ENSMUSG00<br>000031839.6  | <i>Hsbp1</i>              | chr8:119344537<br>-119348927 | 279.4 | 104.1 | 0.4 | $9.2 \times 10^{-3}$ |
| Pac spc | ENSMUSG00<br>000037617.7  | <i>Spag1</i>              | chr15:36179367<br>-36235610  | 29.3  | 10.6  | 0.4 | $2.4 \times 10^{-2}$ |
| Pac spc | ENSMUSG00<br>000039168.11 | <i>Dap</i>                | chr15:31224313<br>-31274341  | 36.2  | 13.2  | 0.4 | $2.5 \times 10^{-2}$ |
| Pac spc | ENSMUSG00<br>000050553.2  | <i>Gk2</i>                | chr5:97392439-<br>97588125   | 204.0 | 75.6  | 0.4 | $1.4 \times 10^{-2}$ |
| Pac spc | ENSMUSG00<br>000009115.5  | <i>Spatc1l</i>            | chr10:76562271<br>-76570532  | 25.2  | 9.0   | 0.4 | $4.9 \times 10^{-2}$ |
| Pac spc | ENSMUSG00<br>000030030.4  | <i>1700003E<br/>16Rik</i> | chr6:83156403-<br>83162975   | 214.5 | 79.3  | 0.4 | $1.3 \times 10^{-2}$ |
| Pac spc | ENSMUSG00<br>000075227.6  | <i>Znhit2</i>             | chr19:6061191-<br>6062472    | 140.2 | 51.7  | 0.4 | $2.0 \times 10^{-2}$ |
| Pac spc | ENSMUSG00<br>000050996.6  | <i>Cetn1</i>              | chr18:9615523-<br>9619478    | 198.1 | 73.1  | 0.4 | $1.3 \times 10^{-2}$ |
| Pac spc | ENSMUSG00<br>000052566.7  | <i>Hook2</i>              | chr8:84990594-<br>85003364   | 20.6  | 7.3   | 0.4 | $4.2 \times 10^{-2}$ |
| Pac spc | ENSMUSG00<br>000028294.11 | <i>1700003M<br/>02Rik</i> | chr4:34688558-<br>34730206   | 279.3 | 103.2 | 0.4 | $1.4 \times 10^{-2}$ |
| Pac spc | ENSMUSG00<br>000033368.8  | <i>Trim69</i>             | chr2:122120107<br>-122186189 | 58.7  | 21.4  | 0.4 | $2.9 \times 10^{-2}$ |
| Pac spc | ENSMUSG00<br>000030801.9  | <i>Kat8</i>               | chr7:127912516<br>-127930113 | 68.5  | 25.0  | 0.4 | $2.6 \times 10^{-2}$ |
| Pac spc | ENSMUSG00<br>000040794.5  | <i>C1qtnf4</i>            | chr2:90885859-<br>90890525   | 106.5 | 38.9  | 0.4 | $9.2 \times 10^{-3}$ |
| Pac spc | ENSMUSG00<br>000028392.11 | <i>Bspry</i>              | chr4:62480052-<br>62497298   | 98.6  | 36.0  | 0.4 | $1.8 \times 10^{-2}$ |
| Pac spc | ENSMUSG00<br>000025324.7  | <i>Atp10a</i>             | chr7:58658201-<br>58829426   | 8.9   | 3.0   | 0.4 | $1.7 \times 10^{-2}$ |
| Pac spc | ENSMUSG00<br>000047383.7  | <i>Als2cr11</i>           | chr1:58997314-<br>59006218   | 62.1  | 22.5  | 0.4 | $1.1 \times 10^{-2}$ |
| Pac spc | ENSMUSG00<br>000022972.5  | <i>1110004E<br/>09Rik</i> | chr16:90925808<br>-90934927  | 138.7 | 50.6  | 0.4 | $1.1 \times 10^{-2}$ |
| Pac spc | ENSMUSG00<br>000027793.2  | <i>Ccna1</i>              | chr3:55045468-<br>55055055   | 33.7  | 12.0  | 0.4 | $3.4 \times 10^{-2}$ |

|         |                           |                           |                              |       |       |     |                      |
|---------|---------------------------|---------------------------|------------------------------|-------|-------|-----|----------------------|
| Pac spc | ENSMUSG00<br>000029073.5  | <i>Ctp</i>                | chr4:155864722<br>-155869440 | 70.9  | 25.7  | 0.4 | $1.4 \times 10^{-2}$ |
| Pac spc | ENSMUSG00<br>000052075.6  | <i>1700029F<br/>12Rik</i> | chr13:97021863<br>-97034362  | 291.8 | 106.2 | 0.4 | $4.3 \times 10^{-3}$ |
| Pac spc | ENSMUSG00<br>000024937.10 | <i>Ehbp11</i>             | chr19:5707375-<br>5726317    | 31.2  | 11.1  | 0.4 | $1.4 \times 10^{-2}$ |
| Pac spc | ENSMUSG00<br>000022525.9  | <i>Hrasls</i>             | chr16:29209694<br>-29230531  | 84.8  | 30.5  | 0.4 | $4.7 \times 10^{-2}$ |
| Pac spc | ENSMUSG00<br>000026807.8  | <i>Ak8</i>                | chr2:28700163-<br>28813165   | 88.2  | 31.7  | 0.4 | $7.0 \times 10^{-3}$ |
| Pac spc | ENSMUSG00<br>000061032.8  | <i>Rrp1</i>               | chr10:78400361<br>-78413043  | 245.9 | 88.9  | 0.4 | $1.1 \times 10^{-2}$ |
| Pac spc | ENSMUSG00<br>000037979.9  | <i>Ccdc92</i>             | chr5:124834417<br>-124862424 | 269.0 | 96.9  | 0.4 | $2.5 \times 10^{-2}$ |
| Pac spc | ENSMUSG00<br>000042404.12 | <i>Dennd4b</i>            | chr3:90265184-<br>90280669   | 16.5  | 5.6   | 0.4 | $1.5 \times 10^{-2}$ |
| Pac spc | ENSMUSG00<br>000038587.8  | <i>Akap12</i>             | chr10:4266328-<br>4359468    | 86.7  | 31.0  | 0.4 | $1.9 \times 10^{-2}$ |
| Pac spc | ENSMUSG00<br>000026790.15 | <i>Odf2</i>               | chr2:29889220-<br>29931746   | 609.6 | 217.8 | 0.4 | $1.6 \times 10^{-2}$ |
| Pac spc | ENSMUSG00<br>000023170.10 | <i>Gps2</i>               | chr11:69913887<br>-69916591  | 120.5 | 42.8  | 0.4 | $1.9 \times 10^{-2}$ |
| Pac spc | ENSMUSG00<br>000050957.4  | <i>Insl6</i>              | chr19:29321343<br>-29325356  | 137.4 | 48.8  | 0.4 | $1.1 \times 10^{-2}$ |
| Pac spc | ENSMUSG00<br>000028576.8  | <i>Ift74</i>              | chr4:94614490-<br>94693229   | 68.2  | 24.0  | 0.4 | $2.3 \times 10^{-2}$ |
| Pac spc | ENSMUSG00<br>000031786.6  | <i>Drc7</i>               | chr8:95055102-<br>95078141   | 36.5  | 12.7  | 0.4 | $7.0 \times 10^{-3}$ |
| Pac spc | ENSMUSG00<br>000047104.4  | <i>Pbp2</i>               | chr6:135309783<br>-135310347 | 119.8 | 42.3  | 0.4 | $2.6 \times 10^{-2}$ |
| Pac spc | ENSMUSG00<br>000022375.6  | <i>Lrrc6</i>              | chr15:66379857<br>-66500910  | 44.1  | 15.4  | 0.4 | $2.6 \times 10^{-2}$ |
| Pac spc | ENSMUSG00<br>000045246.7  | <i>Kcng4</i>              | chr8:119623853<br>-119635680 | 8.0   | 2.5   | 0.4 | $2.2 \times 10^{-2}$ |
| Pac spc | ENSMUSG00<br>000035314.8  | <i>Gdpd5</i>              | chr7:99381548-<br>99460983   | 3.2   | 0.8   | 0.4 | $4.5 \times 10^{-2}$ |
| Pac spc | ENSMUSG00<br>000024387.9  | <i>Csnk2b</i>             | chr17:35116195<br>-35128855  | 719.3 | 254.7 | 0.4 | $1.6 \times 10^{-2}$ |
| Pac spc | ENSMUSG00<br>000068854.7  | <i>Hist2h2be</i>          | chr3:96221118-<br>96223738   | 17.1  | 5.7   | 0.4 | $2.9 \times 10^{-2}$ |
| Pac spc | ENSMUSG00<br>000046447.3  | <i>Camk2n1</i>            | chr4:138454313<br>-138460123 | 7.8   | 2.4   | 0.4 | $2.5 \times 10^{-2}$ |
| Pac spc | ENSMUSG00<br>000074384.3  | <i>Al429214</i>           | chr8:36993574-<br>36995531   | 35.6  | 12.2  | 0.4 | $4.0 \times 10^{-2}$ |
| Pac spc | ENSMUSG00<br>000048707.9  | <i>Tprn</i>               | chr2:25262617-<br>25269885   | 104.4 | 36.4  | 0.4 | $2.2 \times 10^{-2}$ |
| Pac spc | ENSMUSG00<br>000029798.9  | <i>Herc6</i>              | chr6:57580991-<br>57665136   | 4.5   | 1.2   | 0.4 | $4.4 \times 10^{-2}$ |
| Pac spc | ENSMUSG00<br>000062270.9  | <i>Morf4l1</i>            | chr9:90091664-<br>90114774   | 622.7 | 218.1 | 0.4 | $1.5 \times 10^{-2}$ |
| Pac spc | ENSMUSG00<br>000037001.10 | <i>Zfp39</i>              | chr11:58888152<br>-58904225  | 43.3  | 14.9  | 0.4 | $1.6 \times 10^{-2}$ |
| Pac spc | ENSMUSG00<br>000031027.11 | <i>Stk33</i>              | chr7:109279222<br>-109444893 | 180.4 | 62.6  | 0.3 | $1.5 \times 10^{-2}$ |
| Pac spc | ENSMUSG00<br>000054428.8  | <i>Atpif1</i>             | chr4:132530554<br>-132533659 | 159.8 | 55.1  | 0.3 | $3.3 \times 10^{-2}$ |
| Pac spc | ENSMUSG00<br>000026650.11 | <i>Meig1</i>              | chr2:3409042-<br>3422648     | 953.3 | 329.8 | 0.3 | $9.2 \times 10^{-3}$ |

|         |                           |                           |                               |       |       |     |                      |
|---------|---------------------------|---------------------------|-------------------------------|-------|-------|-----|----------------------|
| Pac spc | ENSMUSG00<br>000042293.7  | <i>Gm5617</i>             | chr9:48495344-<br>48495964    | 406.6 | 140.4 | 0.3 | $1.6 \times 10^{-2}$ |
| Pac spc | ENSMUSG00<br>000038782.4  | <i>1700028J<br/>19Rik</i> | chr7:44229932-<br>44236122    | 318.6 | 109.7 | 0.3 | $4.3 \times 10^{-3}$ |
| Pac spc | ENSMUSG00<br>000073758.6  | <i>Sh3d21</i>             | chr4:126150601<br>-126163491  | 37.7  | 12.7  | 0.3 | $3.1 \times 10^{-2}$ |
| Pac spc | ENSMUSG00<br>000041399.3  | <i>1700013G<br/>24Rik</i> | chr4:137453283<br>-137455461  | 53.7  | 18.1  | 0.3 | $3.4 \times 10^{-2}$ |
| Pac spc | ENSMUSG00<br>000045835.4  | <i>Hdgfl1</i>             | chr13:26768172<br>-26770119   | 180.7 | 61.6  | 0.3 | $1.6 \times 10^{-2}$ |
| Pac spc | ENSMUSG00<br>000038729.16 | <i>Akap2</i>              | chr4:57434246-<br>57896984    | 1.3   | 0.1   | 0.3 | $4.3 \times 10^{-2}$ |
| Pac spc | ENSMUSG00<br>000034227.7  | <i>Foxj1</i>              | chr11:11633070<br>3-116335399 | 15.4  | 4.9   | 0.3 | $1.6 \times 10^{-2}$ |
| Pac spc | ENSMUSG00<br>000038949.8  | <i>Cnst</i>               | chr1:179546369<br>-179627478  | 12.8  | 4.0   | 0.3 | $1.4 \times 10^{-2}$ |
| Pac spc | ENSMUSG00<br>000027517.9  | <i>Ankrd60</i>            | chr2:173568665<br>-173578365  | 44.8  | 15.0  | 0.3 | $3.7 \times 10^{-2}$ |
| Pac spc | ENSMUSG00<br>000042249.7  | <i>Adrbk2</i>             | chr5:112910477<br>-113015514  | 8.4   | 2.5   | 0.3 | $2.4 \times 10^{-2}$ |
| Pac spc | ENSMUSG00<br>000073471.2  | <i>Rsph3a</i>             | chr17:7881105-<br>7979824     | 89.2  | 30.0  | 0.3 | $4.3 \times 10^{-3}$ |
| Pac spc | ENSMUSG00<br>000046487.6  | <i>Mospd4</i>             | chr18:46465214<br>-46465790   | 85.8  | 28.8  | 0.3 | $2.9 \times 10^{-2}$ |
| Pac spc | ENSMUSG00<br>000037418.5  | <i>Best1</i>              | chr19:9985173-<br>10001633    | 19.9  | 6.4   | 0.3 | $2.1 \times 10^{-2}$ |
| Pac spc | ENSMUSG00<br>000050107.2  | <i>Gsg2</i>               | chr11:73090582<br>-73147446   | 161.2 | 54.2  | 0.3 | $2.5 \times 10^{-2}$ |
| Pac spc | ENSMUSG00<br>000029151.10 | <i>Slc30a3</i>            | chr5:31086105-<br>31112526    | 91.4  | 30.5  | 0.3 | $4.2 \times 10^{-2}$ |
| Pac spc | ENSMUSG00<br>000034552.4  | <i>Zswim2</i>             | chr2:83915078-<br>83941228    | 26.7  | 8.7   | 0.3 | $2.8 \times 10^{-2}$ |
| Pac spc | ENSMUSG00<br>000026255.11 | <i>Efh1</i>               | chr1:87264362-<br>87310839    | 280.4 | 94.2  | 0.3 | $1.1 \times 10^{-2}$ |
| Pac spc | ENSMUSG00<br>000078627.5  | <i>43169</i>              | chr11:10536079<br>7-105456735 | 296.4 | 99.5  | 0.3 | $1.5 \times 10^{-2}$ |
| Pac spc | ENSMUSG00<br>000031849.8  | <i>Comp</i>               | chr8:70373547-<br>70382065    | 42.8  | 14.1  | 0.3 | $1.9 \times 10^{-2}$ |
| Pac spc | ENSMUSG00<br>000024565.8  | <i>Sall3</i>              | chr18:80966375<br>-80988575   | 3.6   | 0.9   | 0.3 | $4.3 \times 10^{-2}$ |
| Pac spc | ENSMUSG00<br>000099958.1  | <i>1700010B<br/>13Rik</i> | chr15:73645851<br>-73652347   | 19.3  | 6.2   | 0.3 | $4.9 \times 10^{-2}$ |
| Pac spc | ENSMUSG00<br>000039963.14 | <i>Ccdc40</i>             | chr11:11922857<br>1-119265236 | 68.8  | 22.8  | 0.3 | $3.1 \times 10^{-2}$ |
| Pac spc | ENSMUSG00<br>000021997.4  | <i>Lrrc63</i>             | chr14:75084302<br>-75130881   | 37.7  | 12.3  | 0.3 | $1.8 \times 10^{-2}$ |
| Pac spc | ENSMUSG00<br>000047841.8  | <i>BC051628</i>           | chr2:181220012<br>-181222854  | 37.4  | 12.2  | 0.3 | $3.0 \times 10^{-2}$ |
| Pac spc | ENSMUSG00<br>000068860.5  | <i>Gm128</i>              | chr3:95236919-<br>95251193    | 229.1 | 76.2  | 0.3 | $1.7 \times 10^{-2}$ |
| Pac spc | ENSMUSG00<br>000025480.4  | <i>Syce1</i>              | chr7:140777228<br>-140787854  | 215.2 | 71.6  | 0.3 | $4.3 \times 10^{-3}$ |
| Pac spc | ENSMUSG00<br>000070424.7  | <i>Art5</i>               | chr7:102096878<br>-102111148  | 26.8  | 8.6   | 0.3 | $3.0 \times 10^{-2}$ |
| Pac spc | ENSMUSG00<br>000028555.11 | <i>Ttc39a</i>             | chr4:109406622<br>-109444745  | 16.1  | 5.1   | 0.3 | $3.5 \times 10^{-2}$ |
| Pac spc | ENSMUSG00<br>000037910.2  | <i>1700018B<br/>24Rik</i> | chr3:48605731-<br>48609102    | 192.6 | 63.8  | 0.3 | $1.4 \times 10^{-2}$ |

|         |                           |                           |                               |        |       |     |                      |
|---------|---------------------------|---------------------------|-------------------------------|--------|-------|-----|----------------------|
| Pac spc | ENSMUSG00<br>000020878.6  | <i>Lrrc46</i>             | chr11:97034601<br>-97041407   | 383.9  | 127.5 | 0.3 | $9.2 \times 10^{-3}$ |
| Pac spc | ENSMUSG00<br>000022442.11 | <i>Ttll1</i>              | chr15:83483771<br>-83510893   | 21.5   | 6.8   | 0.3 | $2.9 \times 10^{-2}$ |
| Pac spc | ENSMUSG00<br>000024033.9  | <i>Rsph1</i>              | chr17:31255018<br>-31277356   | 743.0  | 246.0 | 0.3 | $9.2 \times 10^{-3}$ |
| Pac spc | ENSMUSG00<br>000064280.9  | <i>Ccdc146</i>            | chr5:21292960-<br>21424677    | 27.4   | 8.7   | 0.3 | $4.7 \times 10^{-2}$ |
| Pac spc | ENSMUSG00<br>000035420.6  | <i>Fam170a</i>            | chr18:50278368<br>-50283019   | 32.3   | 10.4  | 0.3 | $4.8 \times 10^{-2}$ |
| Pac spc | ENSMUSG00<br>000036398.9  | <i>Ppp1r11</i>            | chr17:36948355<br>-36951741   | 298.8  | 98.6  | 0.3 | $3.3 \times 10^{-2}$ |
| Pac spc | ENSMUSG00<br>000040424.11 | <i>Hipk4</i>              | chr7:27523266-<br>27531175    | 16.4   | 5.1   | 0.3 | $1.6 \times 10^{-2}$ |
| Pac spc | ENSMUSG00<br>000032334.9  | <i>Loxl1</i>              | chr9:58287722-<br>58313212    | 4.1    | 1.0   | 0.3 | $4.3 \times 10^{-2}$ |
| Pac spc | ENSMUSG00<br>000044566.11 | <i>Cage1</i>              | chr13:38006051<br>-38061433   | 128.1  | 42.0  | 0.3 | $4.3 \times 10^{-2}$ |
| Pac spc | ENSMUSG00<br>000043621.9  | <i>Ubxn10</i>             | chr4:138709836<br>-138746132  | 89.4   | 29.1  | 0.3 | $1.8 \times 10^{-2}$ |
| Pac spc | ENSMUSG00<br>000006930.11 | <i>Hap1</i>               | chr11:10034732<br>6-100356128 | 27.3   | 8.6   | 0.3 | $1.4 \times 10^{-2}$ |
| Pac spc | ENSMUSG00<br>000028976.6  | <i>Slc2a5</i>             | chr4:150119282<br>-150144169  | 223.2  | 72.7  | 0.3 | $1.6 \times 10^{-2}$ |
| Pac spc | ENSMUSG00<br>000021660.10 | <i>Btf3</i>               | chr13:98309895<br>-98324415   | 173.5  | 56.4  | 0.3 | $1.1 \times 10^{-2}$ |
| Pac spc | ENSMUSG00<br>000031518.6  | <i>Spata4</i>             | chr8:54550330-<br>54610098    | 555.1  | 180.8 | 0.3 | $4.3 \times 10^{-3}$ |
| Pac spc | ENSMUSG00<br>000017195.11 | <i>Zpbp2</i>              | chr11:98551096<br>-98558665   | 133.8  | 43.2  | 0.3 | $1.3 \times 10^{-2}$ |
| Pac spc | ENSMUSG00<br>000031893.6  | <i>Tsnaxip1</i>           | chr8:105827743<br>-105844676  | 60.8   | 19.4  | 0.3 | $1.3 \times 10^{-2}$ |
| Pac spc | ENSMUSG00<br>000024430.9  | <i>Cabyr</i>              | chr18:12741323<br>-12755146   | 56.3   | 17.9  | 0.3 | $1.3 \times 10^{-2}$ |
| Pac spc | ENSMUSG00<br>000035785.5  | <i>Cmtm2b</i>             | chr8:104322236<br>-104330756  | 245.4  | 79.1  | 0.3 | $4.3 \times 10^{-3}$ |
| Pac spc | ENSMUSG00<br>000003354.5  | <i>Ccdc65</i>             | chr15:98708206<br>-98723326   | 121.7  | 39.0  | 0.3 | $4.3 \times 10^{-3}$ |
| Pac spc | ENSMUSG00<br>000074575.4  | <i>Kcng1</i>              | chr2:168260116<br>-168281736  | 6.3    | 1.7   | 0.3 | $2.0 \times 10^{-2}$ |
| Pac spc | ENSMUSG00<br>000050677.2  | <i>Ccdc96</i>             | chr5:36484587-<br>36488172    | 46.2   | 14.5  | 0.3 | $1.1 \times 10^{-2}$ |
| Pac spc | ENSMUSG00<br>000026578.6  | <i>Ccdc181</i>            | chr1:164275584<br>-164287847  | 149.5  | 47.6  | 0.3 | $4.3 \times 10^{-3}$ |
| Pac spc | ENSMUSG00<br>000027528.8  | <i>Fabp9</i>              | chr3:10179850-<br>10197283    | 1302.0 | 415.4 | 0.3 | $4.3 \times 10^{-3}$ |
| Pac spc | ENSMUSG00<br>000080268.3  | <i>Brms1</i>              | chr19:5041403-<br>5049917     | 65.1   | 20.4  | 0.3 | $7.0 \times 10^{-3}$ |
| Pac spc | ENSMUSG00<br>000041566.3  | <i>Tssk1</i>              | chr16:17894222<br>-17897922   | 14.4   | 4.2   | 0.3 | $1.8 \times 10^{-2}$ |
| Pac spc | ENSMUSG00<br>000024973.12 | <i>Hrasls5</i>            | chr19:7612540-<br>7639642     | 480.9  | 152.5 | 0.3 | $1.6 \times 10^{-2}$ |
| Pac spc | ENSMUSG00<br>000087122.1  | <i>4930403D<br/>09Rik</i> | chr11:34226814<br>-34783892   | 111.3  | 34.9  | 0.3 | $4.3 \times 10^{-2}$ |
| Pac spc | ENSMUSG00<br>000073380.1  | <i>Arrdc5</i>             | chr17:56294112<br>-56300286   | 23.4   | 7.1   | 0.3 | $3.8 \times 10^{-2}$ |
| Pac spc | ENSMUSG00<br>000044581.7  | <i>4932415D<br/>10Rik</i> | chr10:82282115<br>-82285278   | 16.0   | 4.7   | 0.3 | $2.4 \times 10^{-2}$ |

|         |                           |                           |                               |       |       |     |                      |
|---------|---------------------------|---------------------------|-------------------------------|-------|-------|-----|----------------------|
| Pac spc | ENSMUSG00<br>000000942.10 | <i>Hoxa4</i>              | chr6:52162510-<br>52221854    | 30.8  | 9.4   | 0.3 | $2.3 \times 10^{-2}$ |
| Pac spc | ENSMUSG00<br>000045915.11 | <i>Ccdc42</i>             | chr11:68587020<br>-68597966   | 58.3  | 18.0  | 0.3 | $2.5 \times 10^{-2}$ |
| Pac spc | ENSMUSG00<br>000033739.8  | <i>Fkbp1</i>              | chr17:34644763<br>-34646324   | 62.3  | 19.2  | 0.3 | $1.6 \times 10^{-2}$ |
| Pac spc | ENSMUSG00<br>000052273.2  | <i>Dnah3</i>              | chr7:119922716<br>-120095177  | 8.4   | 2.3   | 0.3 | $1.3 \times 10^{-2}$ |
| Pac spc | ENSMUSG00<br>000022445.6  | <i>Cyp2d26</i>            | chr15:82790106<br>-82794245   | 7.7   | 2.1   | 0.3 | $4.6 \times 10^{-2}$ |
| Pac spc | ENSMUSG00<br>000084135.3  | <i>Pom121l1<br/>2</i>     | chr11:14599313<br>-14599862   | 79.2  | 24.4  | 0.3 | $1.8 \times 10^{-2}$ |
| Pac spc | ENSMUSG00<br>000030672.8  | <i>Mylpf</i>              | chr7:127211607<br>-127214298  | 1.1   | 0.0   | 0.3 | $4.3 \times 10^{-3}$ |
| Pac spc | ENSMUSG00<br>000035085.5  | <i>1700020L<br/>24Rik</i> | chr11:83437676<br>-83463071   | 25.5  | 7.6   | 0.3 | $4.0 \times 10^{-2}$ |
| Pac spc | ENSMUSG00<br>000024175.1  | <i>Tekt4</i>              | chr17:25471589<br>-25476594   | 51.7  | 15.7  | 0.3 | $7.0 \times 10^{-3}$ |
| Pac spc | ENSMUSG00<br>000029188.10 | <i>Slc34a2</i>            | chr5:53038081-<br>53071664    | 28.2  | 8.4   | 0.3 | $1.3 \times 10^{-2}$ |
| Pac spc | ENSMUSG00<br>000026546.12 | <i>Cfap45</i>             | chr1:172520800<br>-172563717  | 62.6  | 19.1  | 0.3 | $2.0 \times 10^{-2}$ |
| Pac spc | ENSMUSG00<br>000021977.7  | <i>1700129C<br/>05Rik</i> | chr14:59133039<br>-59142893   | 104.2 | 31.9  | 0.3 | $1.4 \times 10^{-2}$ |
| Pac spc | ENSMUSG00<br>000042190.8  | <i>Cmklr1</i>             | chr5:113612353<br>-113650426  | 10.4  | 2.9   | 0.3 | $3.6 \times 10^{-2}$ |
| Pac spc | ENSMUSG00<br>000021258.9  | <i>Ccnk</i>               | chr12:10817973<br>7-108203359 | 174.0 | 53.4  | 0.3 | $7.0 \times 10^{-3}$ |
| Pac spc | ENSMUSG00<br>000027030.11 | <i>Stk39</i>              | chr2:68210444-<br>68472268    | 207.1 | 63.5  | 0.3 | $4.3 \times 10^{-3}$ |
| Pac spc | ENSMUSG00<br>000056223.7  | <i>Spata31</i>            | chr13:64917405<br>-64923184   | 14.8  | 4.2   | 0.3 | $3.8 \times 10^{-2}$ |
| Pac spc | ENSMUSG00<br>000049985.10 | <i>Ankrd55</i>            | chr13:11228845<br>0-112384002 | 6.6   | 1.7   | 0.3 | $3.3 \times 10^{-2}$ |
| Pac spc | ENSMUSG00<br>000100075.1  | <i>1700018L<br/>02Rik</i> | chr19:29020832<br>-29048729   | 53.7  | 16.1  | 0.3 | $9.2 \times 10^{-3}$ |
| Pac spc | ENSMUSG00<br>000030189.11 | <i>Ybx3</i>               | chr6:131364857<br>-131388450  | 619.0 | 189.5 | 0.3 | $2.0 \times 10^{-2}$ |
| Pac spc | ENSMUSG00<br>000029517.9  | <i>Ankrd7</i>             | chr6:18866317-<br>18879586    | 56.9  | 17.0  | 0.3 | $2.0 \times 10^{-2}$ |
| Pac spc | ENSMUSG00<br>000030590.10 | <i>Fam98c</i>             | chr7:29134853-<br>29156920    | 142.6 | 43.2  | 0.3 | $1.6 \times 10^{-2}$ |
| Pac spc | ENSMUSG00<br>000022439.5  | <i>Parvg</i>              | chr15:84324025<br>-84342978   | 4.5   | 1.0   | 0.3 | $3.6 \times 10^{-2}$ |
| Pac spc | ENSMUSG00<br>000090843.2  | <i>Gm17673</i>            | chr12:83954498<br>-83984852   | 6.5   | 1.6   | 0.3 | $4.2 \times 10^{-2}$ |
| Pac spc | ENSMUSG00<br>000102758.1  | <i>RP23-<br/>349M18.1</i> | chr3:23804334-<br>23939477    | 1.1   | 0.0   | 0.3 | $1.3 \times 10^{-2}$ |
| Pac spc | ENSMUSG00<br>000074127.5  | <i>Cmtm2a</i>             | chr8:104281041<br>-104310145  | 397.0 | 120.0 | 0.3 | $4.3 \times 10^{-3}$ |
| Pac spc | ENSMUSG00<br>000078907.1  | <i>Fam186b</i>            | chr15:99271017<br>-99287180   | 50.9  | 15.1  | 0.3 | $1.1 \times 10^{-2}$ |
| Pac spc | ENSMUSG00<br>000043986.5  | <i>Spata31d<br/>1d</i>    | chr13:59725924<br>-59731752   | 6.3   | 1.6   | 0.3 | $2.1 \times 10^{-2}$ |
| Pac spc | ENSMUSG00<br>000046173.2  | <i>Pabpc6</i>             | chr17:9666496-<br>9669704     | 224.3 | 67.5  | 0.3 | $9.2 \times 10^{-3}$ |
| Pac spc | ENSMUSG00<br>000045573.9  | <i>Penk</i>               | chr4:4133530-<br>4188703      | 39.2  | 11.5  | 0.3 | $2.2 \times 10^{-2}$ |

|         |                           |                           |                               |       |       |     |                      |
|---------|---------------------------|---------------------------|-------------------------------|-------|-------|-----|----------------------|
| Pac spc | ENSMUSG00<br>000020679.7  | <i>Hnf1b</i>              | chr11:83850062<br>-83905819   | 4.6   | 1.0   | 0.3 | $4.8 \times 10^{-2}$ |
| Pac spc | ENSMUSG00<br>000049115.10 | <i>Agtr1a</i>             | chr13:30336440<br>-30382867   | 7.7   | 2.0   | 0.3 | $3.8 \times 10^{-2}$ |
| Pac spc | ENSMUSG00<br>000008482.8  | <i>Rnf151</i>             | chr17:24715838<br>-24718057   | 31.6  | 9.1   | 0.3 | $3.3 \times 10^{-2}$ |
| Pac spc | ENSMUSG00<br>000028560.7  | <i>Usp1</i>               | chr4:98923809-<br>98935543    | 138.2 | 41.0  | 0.3 | $4.3 \times 10^{-3}$ |
| Pac spc | ENSMUSG00<br>000053783.5  | <i>1700016K<br/>19Rik</i> | chr11:75999911<br>-76003569   | 103.3 | 30.5  | 0.3 | $2.1 \times 10^{-2}$ |
| Pac spc | ENSMUSG00<br>000046755.5  | <i>Kif2b</i>              | chr11:91575314<br>-91577558   | 42.6  | 12.3  | 0.3 | $7.0 \times 10^{-3}$ |
| Pac spc | ENSMUSG00<br>000026125.5  | <i>Prss39</i>             | chr1:34498409-<br>34503063    | 68.8  | 20.1  | 0.3 | $1.4 \times 10^{-2}$ |
| Pac spc | ENSMUSG00<br>000031841.14 | <i>Cdh13</i>              | chr8:118283732<br>-119324921  | 1.9   | 0.2   | 0.3 | $2.5 \times 10^{-2}$ |
| Pac spc | ENSMUSG00<br>000021643.10 | <i>Serf1</i>              | chr13:10010679<br>4-100114571 | 403.1 | 119.2 | 0.3 | $4.3 \times 10^{-3}$ |
| Pac spc | ENSMUSG00<br>000028813.2  | <i>CK137956</i>           | chr4:127927591<br>-127970951  | 71.5  | 20.8  | 0.3 | $1.1 \times 10^{-2}$ |
| Pac spc | ENSMUSG00<br>000057816.3  | <i>1700007G<br/>11Rik</i> | chr5:98329353-<br>98801910    | 96.1  | 28.1  | 0.3 | $3.3 \times 10^{-2}$ |
| Pac spc | ENSMUSG00<br>000073102.3  | <i>Drc1</i>               | chr5:30281387-<br>30366708    | 39.1  | 11.2  | 0.3 | $1.1 \times 10^{-2}$ |
| Pac spc | ENSMUSG00<br>000043913.10 | <i>Ccdc60</i>             | chr5:116123613<br>-116288985  | 185.4 | 54.5  | 0.3 | $4.3 \times 10^{-3}$ |
| Pac spc | ENSMUSG00<br>000046750.12 | <i>BC089491</i>           | chr7:28284651-<br>28291186    | 35.3  | 10.1  | 0.3 | $7.0 \times 10^{-3}$ |
| Pac spc | ENSMUSG00<br>000029679.7  | <i>Hyal6</i>              | chr6:24733244-<br>24745452    | 39.7  | 11.4  | 0.3 | $7.0 \times 10^{-3}$ |
| Pac spc | ENSMUSG00<br>000027968.7  | <i>Larp7</i>              | chr3:127536953<br>-127553348  | 118.1 | 34.5  | 0.3 | $4.3 \times 10^{-3}$ |
| Pac spc | ENSMUSG00<br>000032204.9  | <i>Aqp9</i>               | chr9:71110658-<br>71168682    | 77.4  | 22.4  | 0.3 | $4.3 \times 10^{-3}$ |
| Pac spc | ENSMUSG00<br>000038555.7  | <i>Reep2</i>              | chr18:34840588<br>-34847463   | 31.4  | 8.8   | 0.3 | $9.2 \times 10^{-3}$ |
| Pac spc | ENSMUSG00<br>000071234.2  | <i>Syndig1l</i>           | chr12:84677277<br>-84698807   | 5.5   | 1.3   | 0.3 | $3.6 \times 10^{-2}$ |
| Pac spc | ENSMUSG00<br>000020475.3  | <i>Pgam2</i>              | chr11:5801639-<br>5803733     | 601.0 | 175.4 | 0.3 | $4.3 \times 10^{-3}$ |
| Pac spc | ENSMUSG00<br>000022269.9  | <i>43170</i>              | chr15:26309047<br>-26409576   | 256.1 | 74.3  | 0.3 | $4.3 \times 10^{-3}$ |
| Pac spc | ENSMUSG00<br>000070980.4  | <i>Actl7b</i>             | chr4:56740004-<br>56741443    | 157.5 | 45.6  | 0.3 | $4.3 \times 10^{-3}$ |
| Pac spc | ENSMUSG00<br>000020799.12 | <i>Tekt1</i>              | chr11:72344721<br>-72362442   | 128.5 | 36.9  | 0.3 | $4.3 \times 10^{-3}$ |
| Pac spc | ENSMUSG00<br>000078442.2  | <i>Ccdc105</i>            | chr10:78746923<br>-78753067   | 27.7  | 7.6   | 0.3 | $1.3 \times 10^{-2}$ |
| Pac spc | ENSMUSG00<br>000028314.6  | <i>Toporsl</i>            | chr4:52596273-<br>52612430    | 36.7  | 10.2  | 0.3 | $4.3 \times 10^{-3}$ |
| Pac spc | ENSMUSG00<br>000036557.4  | <i>1700011E<br/>24Rik</i> | chr17:87389570<br>-87427741   | 297.1 | 84.8  | 0.3 | $4.3 \times 10^{-3}$ |
| Pac spc | ENSMUSG00<br>000037568.8  | <i>Vash2</i>              | chr1:190947645<br>-190979296  | 16.8  | 4.4   | 0.3 | $2.9 \times 10^{-2}$ |
| Pac spc | ENSMUSG00<br>000038398.7  | <i>Upf3a</i>              | chr8:13785614-<br>13798538    | 108.0 | 30.3  | 0.3 | $4.3 \times 10^{-3}$ |
| Pac spc | ENSMUSG00<br>000021585.8  | <i>Cast</i>               | chr13:74694285<br>-74807921   | 12.7  | 3.2   | 0.3 | $3.8 \times 10^{-2}$ |

|         |                           |                           |                               |       |      |     |                      |
|---------|---------------------------|---------------------------|-------------------------------|-------|------|-----|----------------------|
| Pac spc | ENSMUSG00<br>000050114.7  | <i>Prdx6b</i>             | chr2:80292471-<br>80295356    | 131.5 | 36.9 | 0.3 | 4.3×10 <sup>-3</sup> |
| Pac spc | ENSMUSG00<br>000021552.6  | <i>Gkap1</i>              | chr13:58233350<br>-58274188   | 202.5 | 56.9 | 0.3 | 4.3×10 <sup>-3</sup> |
| Pac spc | ENSMUSG00<br>000038025.7  | <i>Phf2</i>               | chr13:48801749<br>-48870885   | 46.5  | 12.7 | 0.3 | 4.3×10 <sup>-3</sup> |
| Pac spc | ENSMUSG00<br>000040829.10 | <i>Zmynd15</i>            | chr11:70453982<br>-70466202   | 38.5  | 10.5 | 0.3 | 7.0×10 <sup>-3</sup> |
| Pac spc | ENSMUSG00<br>000074764.7  | <i>Sel1l2</i>             | chr2:140229854<br>-140389706  | 21.0  | 5.5  | 0.3 | 2.2×10 <sup>-2</sup> |
| Pac spc | ENSMUSG00<br>000063971.6  | <i>1700011A<br/>15Rik</i> | chr15:10144774<br>4-101453909 | 30.5  | 8.2  | 0.3 | 4.9×10 <sup>-2</sup> |
| Pac spc | ENSMUSG00<br>000029624.10 | <i>Ptcd1</i>              | chr5:145140361<br>-145167108  | 40.5  | 11.0 | 0.3 | 3.8×10 <sup>-2</sup> |
| Pac spc | ENSMUSG00<br>000030847.7  | <i>Bag3</i>               | chr7:128523582<br>-128546977  | 10.6  | 2.6  | 0.3 | 7.0×10 <sup>-3</sup> |
| Pac spc | ENSMUSG00<br>000029235.10 | <i>Pdcl2</i>              | chr5:76312114-<br>76331156    | 291.3 | 81.0 | 0.3 | 4.3×10 <sup>-3</sup> |
| Pac spc | ENSMUSG00<br>000036463.7  | <i>4930544G<br/>11Rik</i> | chr6:65952570-<br>65954012    | 146.2 | 40.4 | 0.3 | 7.0×10 <sup>-3</sup> |
| Pac spc | ENSMUSG00<br>000037638.5  | <i>Zbtb42</i>             | chr12:11267882<br>7-112682747 | 22.5  | 5.9  | 0.3 | 1.3×10 <sup>-2</sup> |
| Pac spc | ENSMUSG00<br>000039540.8  | <i>4921524L<br/>21Rik</i> | chr18:6603632-<br>6638966     | 45.6  | 12.3 | 0.3 | 1.9×10 <sup>-2</sup> |
| Pac spc | ENSMUSG00<br>000021545.4  | <i>1700067P<br/>10Rik</i> | chr17:48089631<br>-48090920   | 28.2  | 7.5  | 0.3 | 4.7×10 <sup>-2</sup> |
| Pac spc | ENSMUSG00<br>000034675.13 | <i>Dbn1</i>               | chr13:55473428<br>-55488111   | 9.3   | 2.2  | 0.3 | 3.9×10 <sup>-2</sup> |
| Pac spc | ENSMUSG00<br>000028845.11 | <i>Tekt2</i>              | chr4:126322120<br>-126325688  | 85.5  | 23.3 | 0.3 | 1.6×10 <sup>-2</sup> |
| Pac spc | ENSMUSG00<br>000039335.7  | <i>Spata16</i>            | chr3:26637619-<br>26983212    | 159.5 | 43.6 | 0.3 | 4.3×10 <sup>-3</sup> |
| Pac spc | ENSMUSG00<br>000021846.8  | <i>Peli2</i>              | chr14:48120868<br>-48260883   | 14.6  | 3.7  | 0.3 | 4.3×10 <sup>-3</sup> |
| Pac spc | ENSMUSG00<br>000028310.2  | <i>Ppp3r2</i>             | chr4:49661610-<br>49845744    | 132.7 | 35.9 | 0.3 | 4.3×10 <sup>-3</sup> |
| Pac spc | ENSMUSG00<br>000036214.9  | <i>Znrd1as</i>            | chr17:36958591<br>-36965622   | 57.3  | 15.3 | 0.3 | 4.3×10 <sup>-2</sup> |
| Pac spc | ENSMUSG00<br>000024116.5  | <i>Prss21</i>             | chr17:23868055<br>-23873114   | 30.1  | 7.9  | 0.3 | 1.6×10 <sup>-2</sup> |
| Pac spc | ENSMUSG00<br>000053868.3  | <i>Gm5142</i>             | chr14:59158502<br>-59178749   | 88.4  | 23.8 | 0.3 | 1.4×10 <sup>-2</sup> |
| Pac spc | ENSMUSG00<br>000042581.10 | <i>Thsd7b</i>             | chr1:129273301<br>-130219278  | 11.5  | 2.8  | 0.3 | 1.8×10 <sup>-2</sup> |
| Pac spc | ENSMUSG00<br>000021499.8  | <i>Catsper3</i>           | chr13:55784567<br>-55808998   | 12.6  | 3.1  | 0.3 | 4.9×10 <sup>-2</sup> |
| Pac spc | ENSMUSG00<br>000070331.9  | <i>Qrich2</i>             | chr11:11644132<br>4-116455237 | 207.4 | 56.2 | 0.3 | 4.3×10 <sup>-3</sup> |
| Pac spc | ENSMUSG00<br>000059810.14 | <i>Rgs3</i>               | chr4:62559846-<br>62704001    | 15.4  | 3.8  | 0.3 | 1.6×10 <sup>-2</sup> |
| Pac spc | ENSMUSG00<br>000028637.11 | <i>Ccdc30</i>             | chr4:119322892<br>-119415521  | 166.0 | 44.3 | 0.3 | 2.6×10 <sup>-2</sup> |
| Pac spc | ENSMUSG00<br>000033579.12 | <i>Fa2h</i>               | chr8:111345134<br>-111393824  | 21.1  | 5.3  | 0.3 | 9.2×10 <sup>-3</sup> |
| Pac spc | ENSMUSG00<br>000032680.7  | <i>6820408C<br/>15Rik</i> | chr2:152415586<br>-152444330  | 25.1  | 6.3  | 0.3 | 1.5×10 <sup>-2</sup> |
| Pac spc | ENSMUSG00<br>000023873.8  | <i>1700010I<br/>4Rik</i>  | chr17:8988332-<br>9008319     | 313.4 | 83.5 | 0.3 | 4.3×10 <sup>-3</sup> |

|         |                           |                           |                               |       |       |     |                      |
|---------|---------------------------|---------------------------|-------------------------------|-------|-------|-----|----------------------|
| Pac spc | ENSMUSG00<br>000044362.7  | <i>Ccdc89</i>             | chr7:90426311-<br>90428660    | 47.0  | 12.2  | 0.3 | $1.1 \times 10^{-2}$ |
| Pac spc | ENSMUSG00<br>000067367.5  | <i>Lyar</i>               | chr5:38220469-<br>38234306    | 529.1 | 140.6 | 0.3 | $4.3 \times 10^{-3}$ |
| Pac spc | ENSMUSG00<br>000031831.6  | <i>Dnaaf1</i>             | chr8:119575234<br>-119605222  | 308.3 | 81.6  | 0.3 | $4.3 \times 10^{-3}$ |
| Pac spc | ENSMUSG00<br>000097863.1  | <i>1010001B<br/>22Rik</i> | chr5:109995510<br>-109996398  | 1.4   | 0.0   | 0.3 | $1.8 \times 10^{-2}$ |
| Pac spc | ENSMUSG00<br>000051732.2  | <i>Pabpc2</i>             | chr18:39773496<br>-39776082   | 280.5 | 73.2  | 0.3 | $7.0 \times 10^{-3}$ |
| Pac spc | ENSMUSG00<br>000029999.10 | <i>Tgfa</i>               | chr6:86195250-<br>86275639    | 8.3   | 1.8   | 0.3 | $9.2 \times 10^{-3}$ |
| Pac spc | ENSMUSG00<br>000031493.9  | <i>Ggn</i>                | chr7:29170219-<br>29173933    | 150.0 | 38.6  | 0.3 | $9.2 \times 10^{-3}$ |
| Pac spc | ENSMUSG00<br>000035522.3  | <i>Tsga8</i>              | chrX:82948869-<br>85206141    | 40.9  | 10.2  | 0.3 | $3.8 \times 10^{-2}$ |
| Pac spc | ENSMUSG00<br>000049476.8  | <i>1700104B<br/>16Rik</i> | chr8:33730533-<br>33731819    | 64.0  | 16.2  | 0.3 | $2.6 \times 10^{-2}$ |
| Pac spc | ENSMUSG00<br>000037621.7  | <i>Atoh8</i>              | chr6:72206176-<br>72235577    | 18.2  | 4.3   | 0.3 | $9.2 \times 10^{-3}$ |
| Pac spc | ENSMUSG00<br>000059395.4  | <i>Nkapl</i>              | chr13:21467046<br>-21468509   | 87.3  | 22.1  | 0.3 | $4.3 \times 10^{-3}$ |
| Pac spc | ENSMUSG00<br>000030549.5  | <i>Rhcg</i>               | chr7:79593362-<br>79617657    | 14.8  | 3.4   | 0.3 | $2.6 \times 10^{-2}$ |
| Pac spc | ENSMUSG00<br>000000632.9  | <i>Sez6</i>               | chr11:77930799<br>-77979048   | 6.5   | 1.3   | 0.3 | $1.5 \times 10^{-2}$ |
| Pac spc | ENSMUSG00<br>000017417.10 | <i>Plxdc1</i>             | chr11:97923237<br>-97986444   | 14.5  | 3.4   | 0.3 | $7.0 \times 10^{-3}$ |
| Pac spc | ENSMUSG00<br>000071104.5  | <i>Ccdc110</i>            | chr8:45934618-<br>45944145    | 20.5  | 4.9   | 0.3 | $1.5 \times 10^{-2}$ |
| Pac spc | ENSMUSG00<br>000023949.6  | <i>Tcte1</i>              | chr17:45523433<br>-45549677   | 71.1  | 17.8  | 0.3 | $4.3 \times 10^{-3}$ |
| Pac spc | ENSMUSG00<br>000071636.6  | <i>Rimbp3</i>             | chr16:17208134<br>-17213921   | 123.3 | 31.1  | 0.3 | $4.3 \times 10^{-3}$ |
| Pac spc | ENSMUSG00<br>000062075.9  | <i>Lmnb2</i>              | chr10:80901202<br>-80918245   | 12.1  | 2.7   | 0.3 | $3.9 \times 10^{-2}$ |
| Pac spc | ENSMUSG00<br>000022620.10 | <i>Arsa</i>               | chr15:89472475<br>-89484847   | 99.8  | 24.9  | 0.3 | $4.3 \times 10^{-3}$ |
| Pac spc | ENSMUSG00<br>000040866.9  | <i>Rsph6a</i>             | chr7:19054689-<br>19074447    | 92.8  | 23.1  | 0.3 | $4.3 \times 10^{-3}$ |
| Pac spc | ENSMUSG00<br>000030292.7  | <i>Smco2</i>              | chr6:146850103<br>-146871406  | 62.5  | 15.4  | 0.3 | $4.3 \times 10^{-3}$ |
| Pac spc | ENSMUSG00<br>000024209.9  | <i>1700061G<br/>19Rik</i> | chr17:56875476<br>-56888904   | 17.2  | 3.9   | 0.3 | $7.0 \times 10^{-3}$ |
| Pac spc | ENSMUSG00<br>000022915.3  | <i>1700093J<br/>21Rik</i> | chr16:96082675<br>-96089070   | 1.5   | 0.0   | 0.3 | $4.3 \times 10^{-3}$ |
| Pac spc | ENSMUSG00<br>000079334.4  | <i>Nat6</i>               | chr9:107575819<br>-107587425  | 15.5  | 3.5   | 0.3 | $4.4 \times 10^{-2}$ |
| Pac spc | ENSMUSG00<br>000048988.7  | <i>Elfn1</i>              | chr5:139907942<br>-139974711  | 7.0   | 1.4   | 0.2 | $2.5 \times 10^{-2}$ |
| Pac spc | ENSMUSG00<br>000017832.2  | <i>Hspb9</i>              | chr11:10071384<br>9-100714575 | 352.7 | 87.7  | 0.2 | $4.3 \times 10^{-3}$ |
| Pac spc | ENSMUSG00<br>000022441.13 | <i>Efcab6</i>             | chr15:83866711<br>-84065379   | 70.3  | 17.1  | 0.2 | $4.3 \times 10^{-3}$ |
| Pac spc | ENSMUSG00<br>000038246.6  | <i>Fam50b</i>             | chr13:34734849<br>-34747613   | 67.2  | 16.3  | 0.2 | $1.8 \times 10^{-2}$ |
| Pac spc | ENSMUSG00<br>000034683.8  | <i>Ppp1r1c</i>            | chr2:79707779-<br>79818496    | 22.3  | 5.1   | 0.2 | $3.8 \times 10^{-2}$ |

|         |                           |                           |                               |       |       |     |                      |
|---------|---------------------------|---------------------------|-------------------------------|-------|-------|-----|----------------------|
| Pac spc | ENSMUSG00<br>000034706.12 | <i>Dnaic2</i>             | chr11:11472740<br>7-114757889 | 18.4  | 4.2   | 0.2 | $7.0 \times 10^{-3}$ |
| Pac spc | ENSMUSG00<br>000078127.2  | <i>Fam170b</i>            | chr14:32833961<br>-32836789   | 18.9  | 4.3   | 0.2 | $9.2 \times 10^{-3}$ |
| Pac spc | ENSMUSG00<br>000044117.8  | <i>2900011O<br/>08Rik</i> | chr16:13981701<br>-14101500   | 10.6  | 2.2   | 0.2 | $4.8 \times 10^{-2}$ |
| Pac spc | ENSMUSG00<br>000012042.4  | <i>4930579F<br/>01Rik</i> | chr3:138164134<br>-138186713  | 12.1  | 2.6   | 0.2 | $4.8 \times 10^{-2}$ |
| Pac spc | ENSMUSG00<br>000026649.10 | <i>1700009P<br/>17Rik</i> | chr1:171113917<br>-171126967  | 42.3  | 9.8   | 0.2 | $1.5 \times 10^{-2}$ |
| Pac spc | ENSMUSG00<br>000079523.4  | <i>Tmsb10</i>             | chr6:72957346-<br>72958748    | 655.0 | 156.7 | 0.2 | $4.3 \times 10^{-3}$ |
| Pac spc | ENSMUSG00<br>000100937.1  | <i>1700020D<br/>05Rik</i> | chr19:5495277-<br>5510489     | 122.8 | 29.0  | 0.2 | $4.3 \times 10^{-3}$ |
| Pac spc | ENSMUSG00<br>000085464.1  | <i>Gm16208</i>            | chr8:107029674<br>-107031188  | 1.6   | 0.0   | 0.2 | $2.6 \times 10^{-2}$ |
| Pac spc | ENSMUSG00<br>000043859.4  | <i>1700049L<br/>16Rik</i> | chr10:71979889<br>-71980694   | 22.5  | 5.0   | 0.2 | $1.5 \times 10^{-2}$ |
| Pac spc | ENSMUSG00<br>000027518.3  | <i>1700021F<br/>07Rik</i> | chr2:173522585<br>-173528501  | 54.5  | 12.6  | 0.2 | $2.9 \times 10^{-2}$ |
| Pac spc | ENSMUSG00<br>000035179.3  | <i>Ppp1r32</i>            | chr19:10474256<br>-10482897   | 48.4  | 11.1  | 0.2 | $7.0 \times 10^{-3}$ |
| Pac spc | ENSMUSG00<br>000047025.4  | <i>Ccer1</i>              | chr10:97693058<br>-97694926   | 46.2  | 10.5  | 0.2 | $4.3 \times 10^{-3}$ |
| Pac spc | ENSMUSG00<br>000028610.12 | <i>Dmrtb1</i>             | chr4:107676289<br>-107684230  | 370.7 | 86.9  | 0.2 | $4.3 \times 10^{-3}$ |
| Pac spc | ENSMUSG00<br>000039330.4  | <i>Tsga10ip</i>           | chr19:5390048-<br>5394401     | 78.3  | 18.0  | 0.2 | $1.8 \times 10^{-2}$ |
| Pac spc | ENSMUSG00<br>000036168.11 | <i>Ccdc38</i>             | chr10:93540631<br>-93605245   | 123.1 | 28.5  | 0.2 | $1.7 \times 10^{-2}$ |
| Pac spc | ENSMUSG00<br>000021056.7  | <i>Tex21</i>              | chr12:76198691<br>-76246746   | 19.1  | 4.1   | 0.2 | $1.8 \times 10^{-2}$ |
| Pac spc | ENSMUSG00<br>000055602.12 | <i>Tcp10b</i>             | chr17:13061103<br>-13082481   | 47.8  | 10.7  | 0.2 | $4.3 \times 10^{-3}$ |
| Pac spc | ENSMUSG00<br>000083649.5  | <i>Rasl2-9</i>            | chr7:5124937-<br>5125950      | 72.2  | 16.3  | 0.2 | $4.3 \times 10^{-3}$ |
| Pac spc | ENSMUSG00<br>000022602.10 | <i>Arc</i>                | chr15:74669082<br>-74672570   | 69.8  | 15.7  | 0.2 | $7.0 \times 10^{-3}$ |
| Pac spc | ENSMUSG00<br>000039391.7  | <i>Ccdc81</i>             | chr7:89866147-<br>89903629    | 16.9  | 3.5   | 0.2 | $1.9 \times 10^{-2}$ |
| Pac spc | ENSMUSG00<br>000030544.5  | <i>Mesp1</i>              | chr7:79792240-<br>79793788    | 44.4  | 9.7   | 0.2 | $4.3 \times 10^{-3}$ |
| Pac spc | ENSMUSG00<br>000020023.13 | <i>Tmcc3</i>              | chr10:94311948<br>-94612084   | 9.5   | 1.8   | 0.2 | $2.6 \times 10^{-2}$ |
| Pac spc | ENSMUSG00<br>000001948.9  | <i>Spa17</i>              | chr9:37603294-<br>37613720    | 164.8 | 36.8  | 0.2 | $9.2 \times 10^{-3}$ |
| Pac spc | ENSMUSG00<br>000018776.9  | <i>Slc35g3</i>            | chr11:69759889<br>-69761968   | 16.5  | 3.3   | 0.2 | $1.6 \times 10^{-2}$ |
| Pac spc | ENSMUSG00<br>000038498.3  | <i>Catsper1</i>           | chr19:5335740-<br>5344153     | 15.1  | 3.0   | 0.2 | $9.2 \times 10^{-3}$ |
| Pac spc | ENSMUSG00<br>000081360.1  | <i>Gm11718</i>            | chr11:10719109<br>3-107191630 | 1.8   | 0.0   | 0.2 | $2.4 \times 10^{-2}$ |
| Pac spc | ENSMUSG00<br>000020268.9  | <i>Lyrm7</i>              | chr11:54826865<br>-54860916   | 15.3  | 3.0   | 0.2 | $4.0 \times 10^{-2}$ |
| Pac spc | ENSMUSG00<br>000090273.3  | <i>Prr22</i>              | chr17:56770249<br>-56772208   | 27.7  | 5.7   | 0.2 | $9.2 \times 10^{-3}$ |
| Pac spc | ENSMUSG00<br>000084938.1  | <i>BB557941</i>           | chr2:57127478-<br>57181754    | 1.8   | 0.0   | 0.2 | $1.3 \times 10^{-2}$ |

|         |                           |                           |                               |       |      |     |                      |
|---------|---------------------------|---------------------------|-------------------------------|-------|------|-----|----------------------|
| Pac spc | ENSMUSG00<br>000071322.8  | <i>Tcp10a</i>             | chr17:7324645-<br>7345974     | 80.2  | 17.2 | 0.2 | $9.2 \times 10^{-3}$ |
| Pac spc | ENSMUSG00<br>000011263.11 | <i>Exoc3l2</i>            | chr7:19489055-<br>19496760    | 10.0  | 1.8  | 0.2 | $1.4 \times 10^{-2}$ |
| Pac spc | ENSMUSG00<br>000023165.9  | <i>Ssxb2</i>              | chrX:8454344-<br>8461726      | 1.8   | 0.0  | 0.2 | $1.4 \times 10^{-2}$ |
| Pac spc | ENSMUSG00<br>000021534.7  | <i>1700001L<br/>19Rik</i> | chr13:68597438<br>-68614231   | 14.8  | 2.8  | 0.2 | $4.6 \times 10^{-2}$ |
| Pac spc | ENSMUSG00<br>000052469.8  | <i>Tcp10c</i>             | chr17:13354571<br>-13377223   | 65.1  | 13.6 | 0.2 | $4.3 \times 10^{-3}$ |
| Pac spc | ENSMUSG00<br>000043036.9  | <i>Ccdc63</i>             | chr5:122100950<br>-122138957  | 22.1  | 4.3  | 0.2 | $1.8 \times 10^{-2}$ |
| Pac spc | ENSMUSG00<br>000101963.1  | <i>1700001J<br/>11Rik</i> | chr9:40050364-<br>40053028    | 188.7 | 39.7 | 0.2 | $4.3 \times 10^{-3}$ |
| Pac spc | ENSMUSG00<br>000042189.5  | <i>Tekt3</i>              | chr11:63061653<br>-63094964   | 63.2  | 13.0 | 0.2 | $4.3 \times 10^{-3}$ |
| Pac spc | ENSMUSG00<br>000104111.1  | <i>RP23-<br/>71J17.3</i>  | chr1:160041700<br>-160044331  | 1.9   | 0.0  | 0.2 | $3.6 \times 10^{-2}$ |
| Pac spc | ENSMUSG00<br>000036598.3  | <i>Ccdc113</i>            | chr8:95534099-<br>95558888    | 106.7 | 22.1 | 0.2 | $4.3 \times 10^{-3}$ |
| Pac spc | ENSMUSG00<br>000032023.7  | <i>4931429I1<br/>1Rik</i> | chr9:40894848-<br>40964118    | 24.5  | 4.7  | 0.2 | $2.9 \times 10^{-2}$ |
| Pac spc | ENSMUSG00<br>000027505.2  | <i>Fam209</i>             | chr2:172472519<br>-172474331  | 39.6  | 7.9  | 0.2 | $1.5 \times 10^{-2}$ |
| Pac spc | ENSMUSG00<br>000084837.1  | <i>1700108N<br/>11Rik</i> | chr2:144305174<br>-144332639  | 43.2  | 8.5  | 0.2 | $4.5 \times 10^{-2}$ |
| Pac spc | ENSMUSG00<br>000046585.8  | <i>Cfap58</i>             | chr19:47937711<br>-48035379   | 11.3  | 1.9  | 0.2 | $1.9 \times 10^{-2}$ |
| Pac spc | ENSMUSG00<br>000062154.9  | <i>Tex33</i>              | chr15:78378399<br>-78395912   | 40.9  | 7.9  | 0.2 | $9.2 \times 10^{-3}$ |
| Pac spc | ENSMUSG00<br>000024306.8  | <i>Ccdc178</i>            | chr18:21810896<br>-22171396   | 18.1  | 3.3  | 0.2 | $4.0 \times 10^{-2}$ |
| Pac spc | ENSMUSG00<br>000097562.1  | <i>Gm26639</i>            | chr13:65590292<br>-65591561   | 2.0   | 0.0  | 0.2 | $2.4 \times 10^{-2}$ |
| Pac spc | ENSMUSG00<br>000091955.2  | <i>Gm9844</i>             | chr7:24862212-<br>24862697    | 2.0   | 0.0  | 0.2 | $2.0 \times 10^{-2}$ |
| Pac spc | ENSMUSG00<br>000087510.1  | <i>1700112K<br/>13Rik</i> | chr4:127810637<br>-127812173  | 2.0   | 0.0  | 0.2 | $1.4 \times 10^{-2}$ |
| Pac spc | ENSMUSG00<br>000072878.4  | <i>1700123L<br/>14Rik</i> | chr6:96113153-<br>96657198    | 254.1 | 49.8 | 0.2 | $4.3 \times 10^{-3}$ |
| Pac spc | ENSMUSG00<br>000012211.9  | <i>Tex22</i>              | chr12:11307450<br>1-113088917 | 102.9 | 19.8 | 0.2 | $4.3 \times 10^{-3}$ |
| Pac spc | ENSMUSG00<br>000080059.4  | <i>Rps19-<br/>ps3</i>     | chr4:147821776<br>-147822202  | 2.1   | 0.0  | 0.2 | $2.7 \times 10^{-2}$ |
| Pac spc | ENSMUSG00<br>000021338.13 | <i>Lrrc16a</i>            | chr13:24012343<br>-24280795   | 11.2  | 1.7  | 0.2 | $1.7 \times 10^{-2}$ |
| Pac spc | ENSMUSG00<br>000100585.1  | <i>1700108J<br/>01Rik</i> | chr14:12218169<br>3-122402232 | 181.0 | 33.8 | 0.2 | $4.3 \times 10^{-3}$ |
| Pac spc | ENSMUSG00<br>000049526.7  | <i>Tmem202</i>            | chr9:59518685-<br>59525501    | 28.7  | 5.0  | 0.2 | $7.0 \times 10^{-3}$ |
| Pac spc | ENSMUSG00<br>000029784.9  | <i>Ssmem1</i>             | chr6:30509848-<br>30520254    | 90.5  | 16.0 | 0.2 | $4.3 \times 10^{-3}$ |
| Pac spc | ENSMUSG00<br>000084475.1  | <i>Gm25782</i>            | chr16:8449497-<br>8449786     | 2.5   | 0.0  | 0.2 | $3.8 \times 10^{-2}$ |
| Pac spc | ENSMUSG00<br>000087335.2  | <i>4930526F<br/>13Rik</i> | chr13:54926762<br>-54930256   | 6.0   | 0.6  | 0.2 | $4.7 \times 10^{-2}$ |
| Pac spc | ENSMUSG00<br>000097066.1  | <i>Gm26758</i>            | chr13:65780904<br>-65867305   | 2.9   | 0.0  | 0.1 | $2.1 \times 10^{-2}$ |

|                  |                           |                   |                               |       |        |      |                      |
|------------------|---------------------------|-------------------|-------------------------------|-------|--------|------|----------------------|
| Pac spc          | ENSMUSG00<br>000086443.1  | 4933421A<br>08Rik | chr4:122961308<br>-122963475  | 6.6   | 0.5    | 0.1  | 5.0×10 <sup>-2</sup> |
| Pac spc          | ENSMUSG00<br>000087332.1  | Gm12690           | chr4:99569499-<br>99573011    | 2.9   | 0.0    | 0.1  | 2.3×10 <sup>-2</sup> |
| Pac spc          | ENSMUSG00<br>000030617.8  | Ccdc83            | chr7:90223877-<br>90265432    | 38.7  | 5.1    | 0.1  | 1.8×10 <sup>-2</sup> |
| Pac spc          | ENSMUSG00<br>000094338.1  | Hist1h2bl         | chr13:21715762<br>-21716143   | 3.4   | 0.0    | 0.1  | 4.3×10 <sup>-3</sup> |
| Pac spc          | ENSMUSG00<br>000053896.9  | 4933409G<br>03Rik | chr2:68582412-<br>68616387    | 74.9  | 8.9    | 0.1  | 1.9×10 <sup>-2</sup> |
| Pac spc          | ENSMUSG00<br>000103011.1  | RP23-<br>241J7.2  | chr3:9072766-<br>9073211      | 4.3   | 0.0    | 0.1  | 1.4×10 <sup>-2</sup> |
| Pac spc          | ENSMUSG00<br>000095331.3  | Ptma-ps1          | chr7:24063831-<br>24064140    | 4.6   | 0.0    | 0.1  | 2.6×10 <sup>-2</sup> |
| Pac spc          | ENSMUSG00<br>000084372.1  | Gm13988           | chr2:123273923<br>-123274211  | 10.1  | 0.0    | 0.0  | 9.2×10 <sup>-3</sup> |
| Pac spc          | ENSMUSG00<br>000048559.4  | 4930555K<br>19Rik | chr15:41173700<br>-41173871   | 50.6  | 0.0    | 0.0  | 1.5×10 <sup>-2</sup> |
| Dip spc          | ENSMUSG00<br>000075014.1  | Gm10800           | chr2:98666546-<br>98667301    | 52.6  | 1072.4 | 20.2 | 4.9×10 <sup>-2</sup> |
| Dip spc          | ENSMUSG00<br>000075015.3  | Gm10801           | chr2:98662236-<br>98664083    | 5.6   | 84.6   | 14.0 | 4.9×10 <sup>-2</sup> |
| Dip spc          | ENSMUSG00<br>000000278.10 | Scpep1            | chr11:88905927<br>-88955465   | 13.6  | 61.1   | 4.4  | 4.9×10 <sup>-2</sup> |
| Dip spc          | ENSMUSG00<br>000023572.12 | Ccndbp1           | chr2:121008402<br>-121016904  | 4.0   | 17.7   | 4.1  | 4.9×10 <sup>-2</sup> |
| Dip spc          | ENSMUSG00<br>000058569.7  | Tmed9             | chr13:55593134<br>-55597663   | 8.2   | 29.1   | 3.4  | 4.9×10 <sup>-2</sup> |
| Dip spc          | ENSMUSG00<br>000097164.1  | Cep83os           | chr10:94673492<br>-94688613   | 38.4  | 125.2  | 3.2  | 4.9×10 <sup>-2</sup> |
| Dip spc          | ENSMUSG00<br>000022136.7  | Dnajc3            | chr14:11893793<br>1-118981702 | 21.8  | 61.6   | 2.8  | 4.9×10 <sup>-2</sup> |
| Dip spc          | ENSMUSG00<br>000022501.5  | Prm1              | chr16:10796325<br>-10796886   | 126.4 | 308.2  | 2.4  | 4.9×10 <sup>-2</sup> |
| Dip spc          | ENSMUSG00<br>000038015.6  | Prm2              | chr16:10791379<br>-10796134   | 107.0 | 248.8  | 2.3  | 4.9×10 <sup>-2</sup> |
| Secondary<br>spc | ENSMUSG00<br>000023572.12 | Ccndbp1           | chr2:121008402<br>-121016904  | 0.2   | 12.0   | 17.3 | 3.1×10 <sup>-2</sup> |
| Secondary<br>spc | ENSMUSG00<br>000033713.7  | Foxn3             | chr12:99194979<br>-99450111   | 1.2   | 15.3   | 9.4  | 3.1×10 <sup>-2</sup> |
| Secondary<br>spc | ENSMUSG00<br>000000278.10 | Scpep1            | chr11:88905927<br>-88955465   | 4.9   | 33.9   | 6.3  | 3.1×10 <sup>-2</sup> |
| Secondary<br>spc | ENSMUSG00<br>000022136.7  | Dnajc3            | chr14:11893793<br>1-118981702 | 4.2   | 29.2   | 6.3  | 3.1×10 <sup>-2</sup> |
| Secondary<br>spc | ENSMUSG00<br>000022300.9  | Dcaf13            | chr15:39112864<br>-39146856   | 2.0   | 12.6   | 5.2  | 3.1×10 <sup>-2</sup> |
| Secondary<br>spc | ENSMUSG00<br>000048310.8  | Pskh1             | chr8:105900440<br>-105931778  | 2.2   | 10.2   | 4.0  | 3.1×10 <sup>-2</sup> |
| Secondary<br>spc | ENSMUSG00<br>000028684.10 | Urod              | chr4:116989964<br>-116994413  | 2.4   | 10.0   | 3.7  | 3.1×10 <sup>-2</sup> |
| Secondary<br>spc | ENSMUSG00<br>000058569.7  | Tmed9             | chr13:55593134<br>-55597663   | 0.9   | 4.3    | 3.5  | 3.1×10 <sup>-2</sup> |
| Secondary<br>spc | ENSMUSG00<br>000025134.2  | Alyref            | chr11:12059212<br>0-120598365 | 9.0   | 31.6   | 3.4  | 3.1×10 <sup>-2</sup> |
| Secondary<br>spc | ENSMUSG00<br>000074997.3  | Pin1rt1           | chr2:104713925<br>-104716379  | 3.7   | 10.9   | 2.7  | 3.1×10 <sup>-2</sup> |
| Secondary<br>spc | ENSMUSG00<br>000083282.2  | Ctsf              | chr19:4855128-<br>4860912     | 0.4   | 1.9    | 2.7  | 3.1×10 <sup>-2</sup> |

|               |                      |                      |                           |       |       |      |                      |
|---------------|----------------------|----------------------|---------------------------|-------|-------|------|----------------------|
| Secondary spc | ENSMUSG0000053453.8  | <i>Thoc7</i>         | chr14:13918443-13961225   | 37.5  | 100.8 | 2.7  | $3.1 \times 10^{-2}$ |
| Secondary spc | ENSMUSG0000079606.1  | <i>Gm595</i>         | chrX:48841465-48877713    | 18.5  | 45.3  | 2.4  | $3.1 \times 10^{-2}$ |
| Secondary spc | ENSMUSG0000019210.8  | <i>Atp6v1e1</i>      | chr6:120795244-120822685  | 7.9   | 18.7  | 2.3  | $3.1 \times 10^{-2}$ |
| Secondary spc | ENSMUSG0000102483.1  | <i>RP23-474A1.1</i>  | chr1:177808549-177962233  | 14.7  | 31.9  | 2.1  | $3.1 \times 10^{-2}$ |
| Secondary spc | ENSMUSG0000021534.7  | <i>1700001L19Rik</i> | chr13:68597438-68614231   | 108.1 | 48.8  | 0.5  | $3.1 \times 10^{-2}$ |
| Secondary spc | ENSMUSG0000001948.9  | <i>Spa17</i>         | chr9:37603294-37613720    | 529.1 | 239.1 | 0.5  | $3.1 \times 10^{-2}$ |
| Secondary spc | ENSMUSG0000099863.1  | <i>1700031L13Rik</i> | chr5:82122407-82124713    | 103.6 | 36.1  | 0.4  | $3.1 \times 10^{-2}$ |
| Secondary spc | ENSMUSG0000036249.12 | <i>Rbm43</i>         | chr2:51924447-51935163    | 22.0  | 6.9   | 0.3  | $3.1 \times 10^{-2}$ |
| Secondary spc | ENSMUSG0000064288.4  | <i>Hist1h4k</i>      | chr13:21750193-21750505   | 1.5   | 0.0   | 0.3  | $3.1 \times 10^{-2}$ |
| Sptd          | ENSMUSG0000023572.12 | <i>Ccndbp1</i>       | chr2:121008402-121016904  | 0.3   | 9.5   | 12.5 | $2.4 \times 10^{-2}$ |
| Sptd          | ENSMUSG0000022136.7  | <i>Dnajc3</i>        | chr14:118937931-118981702 | 4.0   | 24.1  | 5.5  | $2.4 \times 10^{-2}$ |
| Sptd          | ENSMUSG0000002985.11 | <i>Apoe</i>          | chr7:19696108-19699166    | 3.0   | 18.6  | 5.4  | $2.4 \times 10^{-2}$ |
| Sptd          | ENSMUSG0000058252.6  | <i>1700008I05Rik</i> | chrX:135654697-135693790  | 16.2  | 87.7  | 5.3  | $2.4 \times 10^{-2}$ |
| Sptd          | ENSMUSG0000022300.9  | <i>Dcaf13</i>        | chr15:39112864-39146856   | 1.5   | 9.5   | 5.0  | $2.4 \times 10^{-2}$ |
| Sptd          | ENSMUSG0000000278.10 | <i>Scpep1</i>        | chr11:88905927-88955465   | 2.9   | 15.3  | 4.6  | $2.4 \times 10^{-2}$ |
| Sptd          | ENSMUSG0000047654.6  | <i>Tssk6</i>         | chr8:69887787-69903518    | 82.3  | 378.9 | 4.6  | $2.4 \times 10^{-2}$ |
| Sptd          | ENSMUSG0000048310.8  | <i>Pskh1</i>         | chr8:105900440-105931778  | 2.0   | 11.1  | 4.6  | $2.4 \times 10^{-2}$ |
| Sptd          | ENSMUSG0000053453.8  | <i>Thoc7</i>         | chr14:13918443-13961225   | 18.4  | 83.6  | 4.4  | $2.4 \times 10^{-2}$ |
| Sptd          | ENSMUSG0000019210.8  | <i>Atp6v1e1</i>      | chr6:120795244-120822685  | 2.8   | 14.2  | 4.4  | $2.4 \times 10^{-2}$ |
| Sptd          | ENSMUSG0000045217.5  | <i>Ppp1r2-ps9</i>    | chrX:15110584-15111466    | 18.7  | 82.6  | 4.3  | $2.4 \times 10^{-2}$ |
| Sptd          | ENSMUSG0000029766.4  | <i>1700012A03Rik</i> | chr6:32050245-32058921    | 32.5  | 136.3 | 4.1  | $2.4 \times 10^{-2}$ |
| Sptd          | ENSMUSG0000036002.8  | <i>Fam214b</i>       | chr4:43027689-43053253    | 10.2  | 43.7  | 4.1  | $2.4 \times 10^{-2}$ |
| Sptd          | ENSMUSG0000051896.4  | <i>Tex37</i>         | chr6:70913086-70918927    | 55.7  | 232.4 | 4.1  | $2.4 \times 10^{-2}$ |
| Sptd          | ENSMUSG0000036918.11 | <i>Ttc7</i>          | chr17:87282885-87381769   | 14.1  | 58.6  | 4.1  | $2.4 \times 10^{-2}$ |
| Sptd          | ENSMUSG0000031085.11 | <i>Gm498</i>         | chr7:143866870-143897506  | 31.3  | 127.5 | 4.0  | $3.7 \times 10^{-2}$ |
| Sptd          | ENSMUSG0000026473.11 | <i>Glul</i>          | chr1:153849541-153909723  | 63.6  | 255.3 | 4.0  | $4.8 \times 10^{-2}$ |
| Sptd          | ENSMUSG0000076438.5  | <i>Oxct2b</i>        | chr4:123105164-123139951  | 47.5  | 190.9 | 4.0  | $2.4 \times 10^{-2}$ |
| Sptd          | ENSMUSG0000050087.3  | <i>Cby3</i>          | chr11:50354461-50359699   | 14.3  | 57.6  | 3.9  | $4.8 \times 10^{-2}$ |
| Sptd          | ENSMUSG0000076436.1  | <i>Oxct2a</i>        | chr4:123312644-123343252  | 44.3  | 173.4 | 3.9  | $2.4 \times 10^{-2}$ |

|      |                           |                           |                               |       |       |     |                      |
|------|---------------------------|---------------------------|-------------------------------|-------|-------|-----|----------------------|
| Sptd | ENSMUSG00<br>000027562.8  | <i>Car2</i>               | chr3:14886272-<br>14900770    | 29.2  | 112.3 | 3.8 | $2.4 \times 10^{-2}$ |
| Sptd | ENSMUSG00<br>000047394.7  | <i>Odf3b</i>              | chr15:89377449<br>-89379254   | 10.0  | 38.4  | 3.7 | $2.4 \times 10^{-2}$ |
| Sptd | ENSMUSG00<br>000049653.4  | <i>Spatc1</i>             | chr15:76268088<br>-76292572   | 38.1  | 139.6 | 3.6 | $3.7 \times 10^{-2}$ |
| Sptd | ENSMUSG00<br>000078346.3  | <i>Gm5132</i>             | chrX:14211147-<br>14211661    | 13.0  | 47.7  | 3.6 | $3.7 \times 10^{-2}$ |
| Sptd | ENSMUSG00<br>000003178.7  | <i>Mical3</i>             | chr6:121007240<br>-121081609  | 41.8  | 148.6 | 3.5 | $2.4 \times 10^{-2}$ |
| Sptd | ENSMUSG00<br>000000125.5  | <i>Wnt3</i>               | chr11:10377414<br>9-103817957 | 5.2   | 18.8  | 3.4 | $3.7 \times 10^{-2}$ |
| Sptd | ENSMUSG00<br>000074259.6  | <i>Gramd2</i>             | chr9:59680143-<br>59718874    | 2.3   | 8.9   | 3.4 | $2.4 \times 10^{-2}$ |
| Sptd | ENSMUSG00<br>000021791.6  | <i>Dydc2</i>              | chr14:41049208<br>-41069074   | 13.9  | 47.5  | 3.3 | $2.4 \times 10^{-2}$ |
| Sptd | ENSMUSG00<br>000027482.8  | <i>Bpifa3</i>             | chr2:154130335<br>-154138356  | 29.1  | 98.1  | 3.3 | $2.4 \times 10^{-2}$ |
| Sptd | ENSMUSG00<br>000036046.10 | <i>5031439G<br/>07Rik</i> | chr15:84943935<br>-84988551   | 8.1   | 27.7  | 3.3 | $2.4 \times 10^{-2}$ |
| Sptd | ENSMUSG00<br>000021194.5  | <i>Chga</i>               | chr12:10255496<br>8-102565027 | 0.6   | 2.9   | 3.2 | $2.4 \times 10^{-2}$ |
| Sptd | ENSMUSG00<br>000020307.10 | <i>Cdc34</i>              | chr10:79682194<br>-79688394   | 102.2 | 325.7 | 3.2 | $3.7 \times 10^{-2}$ |
| Sptd | ENSMUSG00<br>000031770.11 | <i>Herpud1</i>            | chr8:94377920-<br>94395377    | 49.9  | 157.5 | 3.1 | $2.4 \times 10^{-2}$ |
| Sptd | ENSMUSG00<br>000056508.5  | <i>1700001K<br/>19Rik</i> | chr12:11066768<br>8-110682619 | 49.4  | 153.8 | 3.1 | $4.8 \times 10^{-2}$ |
| Sptd | ENSMUSG00<br>000050721.8  | <i>Plekho2</i>            | chr9:65554385-<br>65580040    | 5.3   | 16.9  | 3.0 | $3.7 \times 10^{-2}$ |
| Sptd | ENSMUSG00<br>000058794.8  | <i>Nfe2</i>               | chr15:10324821<br>1-103258403 | 0.5   | 2.6   | 3.0 | $3.7 \times 10^{-2}$ |
| Sptd | ENSMUSG00<br>000031930.10 | <i>Wwp2</i>               | chr8:107436397<br>-107558594  | 13.0  | 39.9  | 3.0 | $4.8 \times 10^{-2}$ |
| Sptd | ENSMUSG00<br>000071076.5  | <i>Jund</i>               | chr8:70697738-<br>70700616    | 13.6  | 41.3  | 3.0 | $2.4 \times 10^{-2}$ |
| Sptd | ENSMUSG00<br>000048038.6  | <i>4932418E<br/>24Rik</i> | chr2:26271645-<br>26294557    | 31.4  | 91.7  | 2.9 | $4.8 \times 10^{-2}$ |
| Sptd | ENSMUSG00<br>000024197.9  | <i>Plin3</i>              | chr17:56278961<br>-56290511   | 1.9   | 5.9   | 2.6 | $3.7 \times 10^{-2}$ |
| Sptd | ENSMUSG00<br>000083282.2  | <i>Ctsf</i>               | chr19:4855128-<br>4860912     | 0.2   | 1.4   | 2.6 | $3.7 \times 10^{-2}$ |
| Sptd | ENSMUSG00<br>000014791.9  | <i>Elmo3</i>              | chr8:105305600<br>-105310623  | 0.3   | 1.3   | 2.3 | $2.4 \times 10^{-2}$ |
| Sptd | ENSMUSG00<br>000036949.12 | <i>Slc39a12</i>           | chr2:14388315-<br>14494977    | 4.7   | 1.4   | 0.4 | $2.4 \times 10^{-2}$ |
| Sptd | ENSMUSG00<br>000099508.1  | <i>1700030L<br/>20Rik</i> | chr3:136435269<br>-136449349  | 16.5  | 5.3   | 0.3 | $4.8 \times 10^{-2}$ |
| Sptd | ENSMUSG00<br>000102758.1  | <i>RP23-<br/>349M18.1</i> | chr3:23804334-<br>23939477    | 8.4   | 2.4   | 0.3 | $2.4 \times 10^{-2}$ |

**Table S3. Expression of piRNA pathway genes in *pi6<sup>em1/em1</sup>* cells.**

| Gene | Ensembl ID | C57BL/6 (fpkm) | <i>pi6<sup>em1/em1</sup></i> (fpkm) | <i>pi6<sup>em1/em1</sup></i> / C57BL/6 | FDR |
|------|------------|----------------|-------------------------------------|----------------------------------------|-----|
|------|------------|----------------|-------------------------------------|----------------------------------------|-----|

### Pachytene Spermatocyte

|                     |                       |       |       |     |     |
|---------------------|-----------------------|-------|-------|-----|-----|
| <i>Piwi1</i>        | ENSMUSG00000029423.6  | 491.0 | 377.3 | 0.8 | 0.7 |
| <i>Piwi2</i>        | ENSMUSG00000033644.4  | 154.5 | 237.4 | 1.5 | 0.4 |
| <i>Mov10l1</i>      | ENSMUSG00000015365.11 | 100.0 | 164.5 | 1.6 | 0.5 |
| <i>A-Myb</i>        | ENSMUSG00000025912.12 | 51.6  | 49.8  | 1.0 | 1.0 |
| <i>Tdrd1</i>        | ENSMUSG00000025081.9  | 188.6 | 194.1 | 1.0 | 1.0 |
| <i>Tdrd6</i>        | ENSMUSG00000040140.10 | 272.3 | 117.1 | 0.4 | 0.1 |
| <i>UAP56/Ddx39b</i> | ENSMUSG00000019432.11 | 90.5  | 115.8 | 1.3 | 0.6 |
| <i>PLD6</i>         | ENSMUSG00000043648.7  | 121.0 | 85.9  | 0.7 | 0.5 |
| <i>Papi/Tdrkh</i>   | ENSMUSG00000041912.8  | 29.4  | 36.4  | 1.2 | 0.7 |
| <i>Tdrd12</i>       | ENSMUSG00000030491.12 | 109.4 | 119.1 | 1.1 | 0.9 |
| <i>Ddx4</i>         | ENSMUSG00000021758.9  | 259.6 | 220.5 | 0.8 | 0.8 |
| <i>Piwi4</i>        | ENSMUSG00000036912.13 | 0.0   | 1.8   | 4.4 | 0.5 |
| <i>Mael</i>         | ENSMUSG00000040629.4  | 600.4 | 340.9 | 0.6 | 0.2 |
| <i>Rnf17</i>        | ENSMUSG00000000365.8  | 85.1  | 99.4  | 1.2 | 0.8 |
| <i>Henmt1</i>       | ENSMUSG00000045662.12 | 37.1  | 30.7  | 0.8 | 0.8 |
| <i>PNLDC1</i>       | ENSMUSG00000073460.4  | 8.0   | 11.3  | 1.4 | 0.6 |

### Diplotene Spermatocyte

|                     |                       |       |       |     |     |
|---------------------|-----------------------|-------|-------|-----|-----|
| <i>Piwi1</i>        | ENSMUSG00000029423.6  | 270.5 | 344.8 | 1.3 | 1.0 |
| <i>Piwi2</i>        | ENSMUSG00000033644.4  | 54.6  | 75.7  | 1.4 | 1.0 |
| <i>Mov10l1</i>      | ENSMUSG00000015365.11 | 33.9  | 43.2  | 1.3 | 1.0 |
| <i>A-Myb</i>        | ENSMUSG00000025912.12 | 43.2  | 47.4  | 1.1 | 1.0 |
| <i>Tdrd1</i>        | ENSMUSG00000025081.9  | 79.7  | 109.9 | 1.4 | 1.0 |
| <i>Tdrd6</i>        | ENSMUSG00000040140.10 | 473.1 | 473.7 | 1.0 | 1.0 |
| <i>UAP56/Ddx39b</i> | ENSMUSG00000019432.11 | 42.4  | 54.3  | 1.3 | 1.0 |
| <i>PLD6</i>         | ENSMUSG00000043648.7  | 90.7  | 110.3 | 1.2 | 1.0 |
| <i>Papi/Tdrkh</i>   | ENSMUSG00000041912.8  | 14.8  | 17.6  | 1.2 | 1.0 |
| <i>Tdrd12</i>       | ENSMUSG00000030491.12 | 62.5  | 78.4  | 1.3 | 1.0 |
| <i>Ddx4</i>         | ENSMUSG00000021758.9  | 216.5 | 190.6 | 0.9 | 1.0 |
| <i>Piwi4</i>        | ENSMUSG00000036912.13 | 0.0   | 0.0   | 1.0 | 1.0 |
| <i>Mael</i>         | ENSMUSG00000040629.4  | 673.1 | 637.9 | 0.9 | 1.0 |
| <i>Rnf17</i>        | ENSMUSG00000000365.8  | 36.4  | 48.7  | 1.3 | 1.0 |
| <i>Henmt1</i>       | ENSMUSG00000045662.12 | 40.7  | 45.4  | 1.1 | 1.0 |
| <i>PNLDC1</i>       | ENSMUSG00000073460.4  | 4.6   | 4.7   | 1.0 | 1.0 |

## Secondary Spermatocyte

|                     |                       |       |       |     |     |
|---------------------|-----------------------|-------|-------|-----|-----|
| <i>Piwil1</i>       | ENSMUSG00000029423.6  | 33.3  | 40.7  | 1.2 | 1.0 |
| <i>Piwil2</i>       | ENSMUSG00000033644.4  | 12.7  | 21.6  | 1.7 | 0.6 |
| <i>Mov10l1</i>      | ENSMUSG00000015365.11 | 10.2  | 15.0  | 1.5 | 1.0 |
| <i>A-Myb</i>        | ENSMUSG00000025912.12 | 30.6  | 34.5  | 1.1 | 1.0 |
| <i>Tdrd1</i>        | ENSMUSG00000025081.9  | 9.7   | 13.8  | 1.4 | 1.0 |
| <i>Tdrd6</i>        | ENSMUSG00000040140.10 | 444.0 | 489.6 | 1.1 | 1.0 |
| <i>UAP56/Ddx39b</i> | ENSMUSG00000019432.11 | 14.3  | 17.0  | 1.2 | 1.0 |
| <i>PLD6</i>         | ENSMUSG00000043648.7  | 20.5  | 32.0  | 1.5 | 1.0 |
| <i>Papi/Tdrkh</i>   | ENSMUSG00000041912.8  | 5.5   | 5.1   | 0.9 | 1.0 |
| <i>Tdrd12</i>       | ENSMUSG00000030491.12 | 20.7  | 22.9  | 1.1 | 1.0 |
| <i>Ddx4</i>         | ENSMUSG00000021758.9  | 294.1 | 223.8 | 0.8 | 1.0 |
| <i>Piwil4</i>       | ENSMUSG00000036912.13 | 0.0   | 0.0   | 0.9 | 1.0 |
| <i>Mael</i>         | ENSMUSG00000040629.4  | 797.2 | 797.4 | 1.0 | 1.0 |
| <i>Rnf17</i>        | ENSMUSG00000000365.8  | 38.0  | 30.3  | 0.8 | 1.0 |
| <i>Henmt1</i>       | ENSMUSG00000045662.12 | 22.7  | 28.5  | 1.3 | 1.0 |
| <i>PNLDC1</i>       | ENSMUSG00000073460.4  | 1.9   | 1.6   | 0.9 | 1.0 |

## Spermatid

|                     |                       |       |       |     |     |
|---------------------|-----------------------|-------|-------|-----|-----|
| <i>Piwil1</i>       | ENSMUSG00000029423.6  | 14.2  | 21.0  | 1.5 | 0.7 |
| <i>Piwil2</i>       | ENSMUSG00000033644.4  | 7.8   | 12.2  | 1.5 | 0.7 |
| <i>Mov10l1</i>      | ENSMUSG00000015365.11 | 8.0   | 6.6   | 0.8 | 0.9 |
| <i>A-Myb</i>        | ENSMUSG00000025912.12 | 12.9  | 18.3  | 1.4 | 0.8 |
| <i>Tdrd1</i>        | ENSMUSG00000025081.9  | 14.8  | 16.7  | 1.1 | 1.0 |
| <i>Tdrd6</i>        | ENSMUSG00000040140.10 | 283.6 | 389.5 | 1.4 | 0.9 |
| <i>UAP56/Ddx39b</i> | ENSMUSG00000019432.11 | 21.1  | 15.2  | 0.7 | 0.8 |
| <i>PLD6</i>         | ENSMUSG00000043648.7  | 24.0  | 15.8  | 0.7 | 0.7 |
| <i>Papi/Tdrkh</i>   | ENSMUSG00000041912.8  | 4.5   | 5.6   | 1.2 | 0.9 |
| <i>Tdrd12</i>       | ENSMUSG00000030491.12 | 14.8  | 16.7  | 1.1 | 1.0 |
| <i>Ddx4</i>         | ENSMUSG00000021758.9  | 34.1  | 60.6  | 1.8 | 0.6 |
| <i>Piwil4</i>       | ENSMUSG00000036912.13 | 0.0   | 0.0   | 1.0 | 1.0 |
| <i>Mael</i>         | ENSMUSG00000040629.4  | 997.0 | 728.6 | 0.7 | 0.8 |
| <i>Rnf17</i>        | ENSMUSG00000000365.8  | 35.1  | 26.7  | 0.8 | 0.8 |
| <i>Henmt1</i>       | ENSMUSG00000045662.12 | 28.1  | 17.9  | 0.6 | 0.7 |
| <i>PNLDC1</i>       | ENSMUSG00000073460.4  | 2.2   | 1.1   | 0.6 | 0.6 |

**Table S4. Transcription factors with altered mRNA abundance in *pi6<sup>em1/em1</sup>* pachytene spermatocytes.**

| Genes         | Ensembl ID             | C57BL/6 (fpkm) | <i>pi6<sup>em1/em1</sup></i> (fpkm) | $\frac{pi6^{em1/em1}}{C57BL/6}$ | FDR                  |
|---------------|------------------------|----------------|-------------------------------------|---------------------------------|----------------------|
| <i>Sohlh1</i> | ENSMUSG000000059625.6  | 0.6            | 10.4                                | 9.9                             | $2.2 \times 10^{-2}$ |
| <i>Sall4</i>  | ENSMUSG000000027547.13 | 0.6            | 9.3                                 | 8.7                             | $4.3 \times 10^{-3}$ |
| <i>Etv6</i>   | ENSMUSG000000030199.12 | 1.4            | 14.2                                | 7.7                             | $3.8 \times 10^{-2}$ |
| <i>Elf4</i>   | ENSMUSG000000031103.8  | 0.3            | 5.3                                 | 7.0                             | $1.6 \times 10^{-2}$ |
| <i>Dmrt1</i>  | ENSMUSG000000024837.11 | 3.8            | 29.4                                | 7.0                             | $4.3 \times 10^{-3}$ |
| <i>Pbx2</i>   | ENSMUSG000000034673.10 | 2.1            | 16.8                                | 6.7                             | $1.8 \times 10^{-2}$ |
| <i>Lin28a</i> | ENSMUSG000000050966.5  | 0.9            | 7.6                                 | 5.6                             | $1.6 \times 10^{-2}$ |
| <i>Erg</i>    | ENSMUSG000000040732.14 | 0.2            | 3.1                                 | 4.9                             | $1.5 \times 10^{-2}$ |
| <i>Ubtf</i>   | ENSMUSG000000020923.13 | 2.7            | 15.0                                | 4.9                             | $1.3 \times 10^{-2}$ |
| <i>Gli3</i>   | ENSMUSG000000021318.11 | 1.1            | 7.2                                 | 4.8                             | $3.9 \times 10^{-2}$ |
| <i>Hif1a</i>  | ENSMUSG000000021109.9  | 2.3            | 11.9                                | 4.4                             | $4.3 \times 10^{-2}$ |
| <i>Usf1</i>   | ENSMUSG000000026641.9  | 1.8            | 9.1                                 | 4.3                             | $4.9 \times 10^{-2}$ |
| <i>Tcf3</i>   | ENSMUSG000000020167.10 | 4.5            | 20.3                                | 4.2                             | $1.1 \times 10^{-2}$ |
| <i>Tcf12</i>  | ENSMUSG000000032228.12 | 9.5            | 36.8                                | 3.8                             | $1.8 \times 10^{-2}$ |
| <i>Sohlh2</i> | ENSMUSG000000027794.4  | 4.1            | 16.6                                | 3.7                             | $4.8 \times 10^{-2}$ |
| <i>Zfp292</i> | ENSMUSG000000039967.10 | 2.2            | 8.9                                 | 3.5                             | $7.0 \times 10^{-3}$ |
| <i>Foxo1</i>  | ENSMUSG000000044167.6  | 1.5            | 6.3                                 | 3.4                             | $4.3 \times 10^{-3}$ |
| <i>Mlxipl</i> | ENSMUSG000000005373.9  | 0.3            | 2.1                                 | 3.2                             | $3.3 \times 10^{-2}$ |
| <i>Jund</i>   | ENSMUSG000000071076.5  | 4.3            | 14.4                                | 3.1                             | $2.6 \times 10^{-2}$ |
| <i>Notch2</i> | ENSMUSG000000027878.10 | 3.4            | 8.3                                 | 2.2                             | $3.6 \times 10^{-2}$ |
| <i>Rfx2</i>   | ENSMUSG000000024206.10 | 182.8          | 77.6                                | 0.4                             | $3.8 \times 10^{-2}$ |
| <i>Hoxa4</i>  | ENSMUSG000000000942.10 | 30.8           | 9.4                                 | 0.3                             | $2.3 \times 10^{-2}$ |
| <i>Foxj1</i>  | ENSMUSG000000034227.7  | 15.4           | 4.9                                 | 0.3                             | $1.6 \times 10^{-2}$ |

## References

Goertz et al., 2011; Howard et al., 2014; Hough et al., 2014; Kistler et al., 2015; Lacorazza et al., 2006; McIntyre et al., 2013; Saleh et al., 2000; Sakashita et al., 2018; Selleri et al., 2004; Stauber et al., 2017; Suzuki et al., 2012; Thépot et al., 2000; Wang et al., 2011; Yamaguchi et al., 2015; Yu et al., 2008; Zhang et al., 2016; Zheng et al., 2009; Zhou et al., 2017

**Table S5. Gene Ontology of genes with decreased expression in *pi6<sup>em1/em1</sup>* pachytene spermatocytes.**

| GO Biological process                                         | Mus musculus reference list (22,262 genes) | Number of genes | Expected enrichment | Observed enrichment | p-value                | FDR                    |
|---------------------------------------------------------------|--------------------------------------------|-----------------|---------------------|---------------------|------------------------|------------------------|
| Cilium organization (GO:0044782)                              | 292                                        | 27              | 4.54                | 5.95                | $7.46 \times 10^{-13}$ | $1.44 \times 10^{-9}$  |
| Cilium assembly (GO:0060271)                                  | 261                                        | 25              | 4.06                | 6.16                | $2.66 \times 10^{-12}$ | $4.13 \times 10^{-9}$  |
| Cell projection assembly (GO:0030031)                         | 363                                        | 27              | 5.64                | 4.79                | $7.85 \times 10^{-11}$ | $8.68 \times 10^{-8}$  |
| Plasma membrane bounded cell projection assembly (GO:0120031) | 350                                        | 26              | 5.44                | 4.78                | $1.83 \times 10^{-10}$ | $1.89 \times 10^{-7}$  |
| Axonemal dynein complex assembly (GO:0070286)                 | 33                                         | 9               | 0.51                | 17.55               | $1.19 \times 10^{-8}$  | $1.08 \times 10^{-5}$  |
| Axoneme assembly (GO:0035082)                                 | 65                                         | 11              | 1.01                | 10.89               | $2.17 \times 10^{-8}$  | $1.68 \times 10^{-5}$  |
| Microtubule bundle formation (GO:0001578)                     | 95                                         | 11              | 1.48                | 7.45                | $7.01 \times 10^{-7}$  | $4.17 \times 10^{-4}$  |
| Cell projection organization (GO:0030030)                     | 1059                                       | 36              | 16.46               | 2.19                | $1.97 \times 10^{-5}$  | $7.45 \times 10^{-3}$  |
| Sperm motility (GO:0097722)                                   | 84                                         | 17              | 1.31                | 13.02               | $2.34 \times 10^{-13}$ | $6.03 \times 10^{-10}$ |
| Flagellated sperm motility (GO:0030317)                       | 80                                         | 15              | 1.24                | 12.06               | $1.60 \times 10^{-11}$ | $1.90 \times 10^{-8}$  |
| Cilium movement (GO:0003341)                                  | 55                                         | 11              | 0.85                | 12.87               | $4.67 \times 10^{-9}$  | $4.52 \times 10^{-6}$  |
| Cilium or flagellum-dependent cell motility (GO:0001539)      | 24                                         | 8               | 0.37                | 21.45               | $2.12 \times 10^{-8}$  | $1.73 \times 10^{-5}$  |
| Cilium-dependent cell motility (GO:0060285)                   | 24                                         | 8               | 0.37                | 21.45               | $2.12 \times 10^{-8}$  | $1.82 \times 10^{-5}$  |
| Cilium movement involved in cell motility (GO:0060294)        | 12                                         | 5               | 0.19                | 26.81               | $4.34 \times 10^{-6}$  | $2.04 \times 10^{-3}$  |
| Microtubule-based movement (GO:0007018)                       | 240                                        | 15              | 3.73                | 4.02                | $1.00 \times 10^{-5}$  | $4.45 \times 10^{-3}$  |
| Regulation of cilium movement (GO:0003352)                    | 15                                         | 5               | 0.23                | 21.45               | $1.05 \times 10^{-5}$  | $4.50 \times 10^{-3}$  |
| Regulation of microtubule-based movement (GO:0060632)         | 29                                         | 6               | 0.45                | 13.31               | $1.37 \times 10^{-5}$  | $5.60 \times 10^{-3}$  |
| Fertilization (GO:0009566)                                    | 166                                        | 16              | 2.58                | 6.2                 | $2.26 \times 10^{-8}$  | $1.67 \times 10^{-5}$  |
| Single fertilization (GO:0007338)                             | 123                                        | 12              | 1.91                | 6.28                | $1.17 \times 10^{-6}$  | $6.48 \times 10^{-4}$  |
| Binding of sperm to zona pellucida (GO:0007339)               | 38                                         | 7               | 0.59                | 11.85               | $5.09 \times 10^{-6}$  | $2.32 \times 10^{-3}$  |
| Sperm-egg recognition (GO:0035036)                            | 43                                         | 7               | 0.67                | 10.47               | $1.05 \times 10^{-5}$  | $4.40 \times 10^{-3}$  |
| Sperm capacitation (GO:0048240)                               | 31                                         | 6               | 0.48                | 12.45               | $1.92 \times 10^{-5}$  | $7.42 \times 10^{-3}$  |
| Sexual reproduction (GO:0019953)                              | 806                                        | 49              | 12.53               | 3.91                | $1.53 \times 10^{-15}$ | $2.38 \times 10^{-11}$ |
| Spermatogenesis (GO:0007283)                                  | 529                                        | 39              | 8.22                | 4.74                | $4.90 \times 10^{-15}$ | $2.53 \times 10^{-11}$ |

|                                                            |      |    |       |      |                        |                        |
|------------------------------------------------------------|------|----|-------|------|------------------------|------------------------|
| Multi-organism reproductive process (GO:0044703)           | 929  | 52 | 14.44 | 3.6  | $4.55 \times 10^{-15}$ | $3.52 \times 10^{-11}$ |
| Male gamete generation (GO:0048232)                        | 549  | 39 | 8.53  | 4.57 | $1.51 \times 10^{-14}$ | $5.84 \times 10^{-11}$ |
| Multicellular organismal reproductive process (GO:0048609) | 786  | 45 | 12.22 | 3.68 | $1.84 \times 10^{-13}$ | $5.70 \times 10^{-10}$ |
| Multicellular organism reproduction (GO:0032504)           | 798  | 45 | 12.4  | 3.63 | $3.03 \times 10^{-13}$ | $6.71 \times 10^{-10}$ |
| Gamete generation (GO:0007276)                             | 664  | 40 | 10.32 | 3.88 | $1.01 \times 10^{-12}$ | $1.74 \times 10^{-9}$  |
| Reproduction (GO:0000003)                                  | 1334 | 57 | 20.73 | 2.75 | $9.11 \times 10^{-12}$ | $1.18 \times 10^{-8}$  |
| Reproductive process (GO:0022414)                          | 1333 | 57 | 20.72 | 2.75 | $8.86 \times 10^{-12}$ | $1.25 \times 10^{-8}$  |
| Spermatid differentiation (GO:0048515)                     | 217  | 18 | 3.37  | 5.34 | $2.58 \times 10^{-8}$  | $1.82 \times 10^{-5}$  |
| Spermatid development (GO:0007286)                         | 209  | 17 | 3.25  | 5.23 | $8.23 \times 10^{-8}$  | $5.31 \times 10^{-5}$  |
| Germ cell development (GO:0007281)                         | 313  | 17 | 4.86  | 3.49 | $1.49 \times 10^{-5}$  | $5.91 \times 10^{-3}$  |
| Organelle assembly (GO:0070925)                            | 620  | 28 | 9.64  | 2.91 | $9.23 \times 10^{-7}$  | $5.30 \times 10^{-4}$  |
| Microtubule-based process (GO:0007017)                     | 628  | 27 | 9.76  | 2.77 | $3.51 \times 10^{-6}$  | $1.70 \times 10^{-3}$  |

**Table S6. Genes with reduced expression in *pi6<sup>em1/em1</sup>* pachytene spermatocytes that are mapped to major Gene Ontology categories.**

| Gene            | Cilium assembly | Sperm motility | Fertilization |
|-----------------|-----------------|----------------|---------------|
| <i>Acr</i>      |                 |                | +             |
| <i>Adam3</i>    |                 | +              | +             |
| <i>Arl3</i>     | +               | +              |               |
| <i>Arsa</i>     |                 |                | +             |
| <i>Cabyr</i>    |                 |                | +             |
| <i>Cast</i>     |                 |                | +             |
| <i>Catsper1</i> |                 | +              | +             |
| <i>Catsper3</i> |                 | +              | +             |
| <i>Ccdc40</i>   | +               | +              |               |
| <i>Ccdc63</i>   | +               | +              |               |
| <i>Ccdc65</i>   | +               | +              |               |
| <i>Ccdc113</i>  | +               |                |               |
| <i>Cdh13</i>    | +               |                |               |
| <i>Dkk1</i>     |                 |                | +             |
| <i>Dnaaf1</i>   | +               | +              |               |
| <i>Dnah3</i>    |                 | +              |               |
| <i>Dnaic2</i>   | +               | +              |               |
| <i>Drc1</i>     | +               | +              |               |
| <i>Dzip1</i>    | +               |                |               |
| <i>Efh1</i>     | +               |                |               |
| <i>Fbp1</i>     | +               |                |               |
| <i>Foxj1</i>    | +               |                |               |
| <i>Gdpd5</i>    | +               |                |               |
| <i>Hap1</i>     | +               | +              |               |
| <i>Hist1h1t</i> |                 | +              | +             |
| <i>Ift74</i>    | +               | +              |               |
| <i>Insl6</i>    |                 | +              | +             |
| <i>Kif2b</i>    |                 | +              |               |
| <i>Lrrc6</i>    | +               | +              |               |
| <i>Lrrc46</i>   | +               |                |               |

|                 |   |   |   |
|-----------------|---|---|---|
| <i>Lrrcc1</i>   | + |   |   |
| <i>Nphp1</i>    | + |   |   |
| <i>Nubp2</i>    | + |   |   |
| <i>Odf2</i>     | + |   |   |
| <i>Parvg</i>    | + |   |   |
| <i>Pbp2</i>     |   |   | + |
| <i>Prkaca</i>   |   |   | + |
| <i>Rfx2</i>     | + |   |   |
| <i>Rimbp3</i>   |   |   | + |
| <i>Rsph1</i>    | + |   |   |
| <i>Slc9c1</i>   |   | + |   |
| <i>Slc22a16</i> |   | + | + |
| <i>Slc26a8</i>  |   | + | + |
| <i>Spa17</i>    |   |   | + |
| <i>Spata4</i>   |   | + |   |
| <i>Spag1</i>    |   |   | + |
| <i>Spink2</i>   |   |   | + |
| <i>Tcp10a</i>   | + |   |   |
| <i>Tcp10b</i>   | + |   |   |
| <i>Tcp10c</i>   | + |   |   |
| <i>Tcte1</i>    |   | + |   |
| <i>Tekt1</i>    | + | + |   |
| <i>Tekt2</i>    | + | + |   |
| <i>Tekt3</i>    | + | + |   |
| <i>Tekt4</i>    | + | + |   |
| <i>Tex40</i>    |   | + | + |
| <i>Tprn</i>     | + |   |   |
| <i>Tsga10ip</i> | + |   |   |
| <i>Ttll1</i>    | + | + |   |
| <i>Ubxn10</i>   | + |   |   |
| <i>Vdac2</i>    |   |   | + |
| <i>Ybx3</i>     |   |   | + |
| <i>Zpbp2</i>    |   |   | + |

**Table S8. Published male fertility genes with altered expression in *pi6<sup>em1/em1</sup>* cells.**

| Gene            | ENSEMBL ID            | Reference                                                 | C57BL/6 (fpkm) | <i>pi6<sup>em1/em1</sup></i> (fpkm) | <i>pi6<sup>em1/em1</sup></i> C57BL/6 | FDR                |
|-----------------|-----------------------|-----------------------------------------------------------|----------------|-------------------------------------|--------------------------------------|--------------------|
| <i>Adam3</i>    | ENSMUSG00000031553.11 | Yamaguchi et al., 2009                                    | 182.1          | 72.4                                | 0.4                                  | $3 \times 10^{-2}$ |
| <i>Catsper1</i> | ENSMUSG00000038498.3  | Ren et al., 2009; Avenarius et al., 2009; Qi et al., 2007 | 15.1           | 3.0                                 | 0.2                                  | $9 \times 10^{-3}$ |
| <i>Catsper3</i> | ENSMUSG00000021499.8  | Qi et al., 2007                                           | 12.6           | 3.1                                 | 0.3                                  | $5 \times 10^{-2}$ |
| <i>Ccdc40</i>   | ENSMUSG00000039963.14 | Antony et al., 2013; Becker-Heck et al., 2011             | 68.8           | 22.8                                | 0.3                                  | $3 \times 10^{-2}$ |
| <i>Ccdc42</i>   | ENSMUSG00000045915.11 | Pasek et al., 2016                                        | 58.3           | 18.0                                | 0.3                                  | $3 \times 10^{-2}$ |
| <i>Ccdc65</i>   | ENSMUSG00000003354.5  | Horani et al., 2013                                       | 121.7          | 39.0                                | 0.3                                  | $4 \times 10^{-3}$ |
| <i>Ccna1</i>    | ENSMUSG00000027793.2  | Liu et al., 1998                                          | 33.7           | 12.0                                | 0.4                                  | $3 \times 10^{-2}$ |
| <i>Dnaic2</i>   | ENSMUSG00000034706.12 | Guichard et al., 2001                                     | 18.4           | 4.2                                 | 0.2                                  | $7 \times 10^{-3}$ |
| <i>Drc1</i>     | ENSMUSG00000073102.3  | Wirschell et al., 2013                                    | 39.1           | 11.2                                | 0.3                                  | $1 \times 10^{-2}$ |
| <i>Gga1</i>     | ENSMUSG00000033128.8  | International Mouse Phenotyping Consortium                | 49.8           | 18.7                                | 0.4                                  | $2 \times 10^{-2}$ |
| <i>Hnf1b</i>    | ENSMUSG00000020679.7  | Mieusset et al., 2017                                     | 4.6            | 1.0                                 | 0.3                                  | $5 \times 10^{-2}$ |
| <i>Ift74</i>    | ENSMUSG00000028576.8  | San Agustin et al., 2015                                  | 68.2           | 24.0                                | 0.4                                  | $2 \times 10^{-2}$ |
| <i>Lrrcc1</i>   | ENSMUSG00000027550.10 | International Mouse Phenotyping Consortium                | 76.1           | 31.3                                | 0.4                                  | $2 \times 10^{-2}$ |
| <i>Meig1</i>    | ENSMUSG00000026650.11 | Zhang et al., 2009; Salzberg et al., 2010                 | 953.3          | 329.8                               | 0.3                                  | $9 \times 10^{-3}$ |
| <i>Ppp3cc</i>   | ENSMUSG00000022092.10 | Miyata et al., 2015                                       | 89.0           | 39.5                                | 0.4                                  | $3 \times 10^{-2}$ |
| <i>Ppp3r2</i>   | ENSMUSG00000028310.2  | International Mouse Phenotyping Consortium                | 132.7          | 35.9                                | 0.3                                  | $4 \times 10^{-3}$ |
| <i>Prm1</i>     | ENSMUSG00000022501.5  | Haueter et al., 2010                                      | 126.4          | 308.2                               | 2.4                                  | $5 \times 10^{-2}$ |
| <i>Rfx2</i>     | ENSMUSG00000024206.10 | Kistler et al., 2015; Shawlot et al., 2015                | 182.8          | 77.6                                | 0.4                                  | $4 \times 10^{-2}$ |
| <i>Spink2</i>   | ENSMUSG00000053030.7  | International Mouse Phenotyping Consortium                | 391.6          | 146.7                               | 0.4                                  | $7 \times 10^{-3}$ |
| <i>Stk33</i>    | ENSMUSG00000031027.11 | Martins et al., 2018                                      | 180.4          | 62.6                                | 0.3                                  | $2 \times 10^{-2}$ |
| <i>Syce1</i>    | ENSMUSG00000025480.4  | Bolcun-Filas et al., 2009; Maor-Sagie et al., 2015        | 215.2          | 71.6                                | 0.3                                  | $4 \times 10^{-3}$ |
| <i>Tekt2</i>    | ENSMUSG00000028845.11 | Iguchi et al., 1999; Tanaka et al., 2004                  | 85.5           | 23.3                                | 0.3                                  | $2 \times 10^{-2}$ |
| <i>Tekt3</i>    | ENSMUSG00000042189.5  | Roy et al., 2009                                          | 63.2           | 13.0                                | 0.2                                  | $4 \times 10^{-3}$ |
| <i>Tekt4</i>    | ENSMUSG00000024175.1  | Roy et al., 2007                                          | 51.7           | 15.7                                | 0.3                                  | $7 \times 10^{-3}$ |
| <i>Ttll1</i>    | ENSMUSG00000022442.11 | Vogel et al., 2010                                        | 22.0           | 7.3                                 | 0.3                                  | $3 \times 10^{-2}$ |

|             |                           |                  |       |      |     |                    |
|-------------|---------------------------|------------------|-------|------|-----|--------------------|
| <i>Zbp2</i> | ENSMUSG000<br>00017195.11 | Lin et al., 2007 | 133.8 | 43.2 | 0.3 | $1 \times 10^{-2}$ |
|-------------|---------------------------|------------------|-------|------|-----|--------------------|
